# Supplementary material for: Pinin Induces Epithelial-to-Mesenchymal Transition in Hepatocellular Carcinoma by Regulating m6A Modification
Source: Hindawi journal article supplement (doi:10.1155/2021/7529164), 2021-12-07
Supplement: f1 [file 7529164.f1.zip]

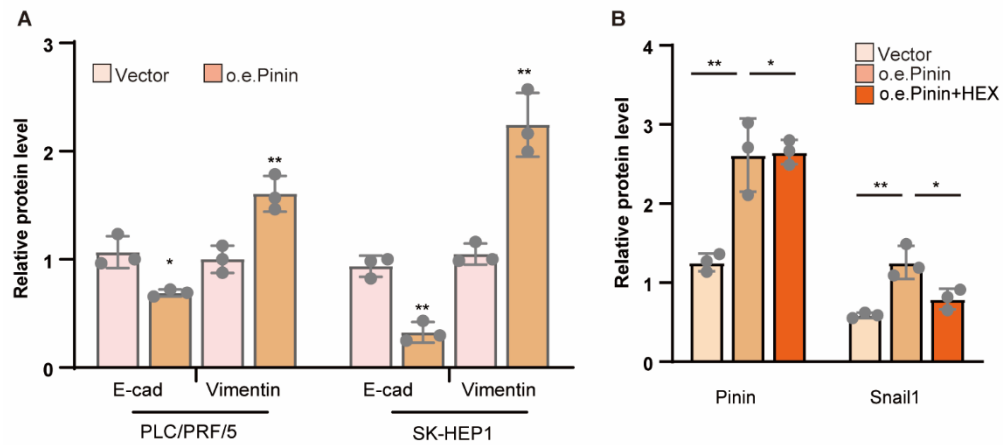

**Figure S1: Statistical data for the difference between lanes about western blot assay.**

(A) Statistical data for figure 2G. (B) Statistical data for figure 5B. All data were represented as mean  $\pm$  SEM \*  $p < 0.05$ , \*\*  $p < 0.01$ , \*\*\*  $p < 0.001$ .
