# Supplementary material for: Pinin Induces Epithelial-to-Mesenchymal Transition in Hepatocellular Carcinoma by Regulating m6A Modification
Source: J Oncol. 2021 Dec 7;2021:7529164. doi: 10.1155/2021/7529164 (PMC8670902; doi:10.1155/2021/7529164)
Supplement: Supplementary Materials — Figure S1: statistical data for the difference between lanes about western blot assay, related Figures 2 and 5. Table S1: the protein list interacting with Pinin predicted by fpclass, related Figure 3. Table S2: MS data of interaction proteomics of METTL3, related Figure 3. [file 7529164.f1.zip]

Archive with 3 entries (3 files):
- 7529164.f1/Supplementary File.pdf
- 7529164.f1/Table S1 interactions_data of pinin.txt
- 7529164.f1/Table S2 MS data of interaction proteomics of METTL3.txt
