# Supplementary material for: Pinin Induces Epithelial-to-Mesenchymal Transition in Hepatocellular Carcinoma by Regulating m6A Modification
Source: J Oncol. 2021 Dec 7;2021:7529164. doi: 10.1155/2021/7529164 (PMC8670902; doi:10.1155/2021/7529164)
Supplement: Supplementary Materials — Figure S1: statistical data for the difference between lanes about western blot assay, related Figures 2 and 5. Table S1: the protein list interacting with Pinin predicted by fpclass, related Figure 3. Table S2: MS data of interaction proteomics of METTL3, related Figure 3. [file 7529164.f1.zip › 7529164.f1/Table S1 interactions_data of pinin.txt]

Query ID	Predicted Partner Symbol	Predicted Partner UniProt	Total Score
PNN	BCLAF1	Q9NYF8	0.8826
PNN	YWHAG	P61981	0.8826
PNN	TRA2B	P62995	0.8826
PNN	SRSF11	Q05519	0.8826
PNN	PRPF4B	Q13523	0.8826
PNN	RBM39	Q14498	0.8826
PNN	SRRM1	Q8IYB3	0.8826
PNN	SREK1	Q8WXA9	0.8826
PNN	LUC7L3	O95232	0.8826
PNN	FUBP1	Q96AE4	0.8695
PNN	HDAC2 (HD2)	Q92769	0.8473
PNN	HNRNPA1	P09651	0.8473
PNN	SMC3	Q9UQE7	0.8354
PNN	SRSF3	P84103	0.8302
PNN	RSRC2	Q7L4I2	0.8302
PNN	DHX15	O43143	0.8302
PNN	PPIG (Peptidyl-prolyl isomerase G)	Q13427	0.8233
PNN	SRPK1	Q96SB4	0.8203
PNN	YWHAB	P31946	0.8117
PNN	HNRNPA2B1	P22626	0.811
PNN	KRT18	P05783	0.7857
PNN	NCL	P19338	0.781
PNN	SFPQ	P23246	0.781
PNN	PPWD1	Q96BP3	0.7788
PNN	YWHAQ	P27348	0.7788
PNN	XPO1	O14980	0.7763
PNN	DEK	P35659	0.7763
PNN	ARRB2	P32121	0.7659
PNN	RAF1	P04049	0.7648
PNN	HNRNPR	O43390	0.7634
PNN	SRRM2	Q9UQ35	0.7615
PNN	SRSF2	Q01130	0.7579
PNN	SART3	Q15020	0.7545
PNN	PRPF38B	Q5VTL8	0.7438
PNN	DDX5	P17844	0.7342
PNN	HNRNPC	P07910	0.7216
PNN	RBM25	P49756	0.7033
PNN	SRSF10	O75494	0.6987
PNN	SON	P18583	0.6987
PNN	ROCK1	Q13464	0.6907
PNN	NOLC1	Q14978	0.6907
PNN	SMARCA5	O60264	0.6824
PNN	SSB	P05455	0.6797
PNN	PSIP1	O75475	0.673
PNN	7-Mar	Q9H992	0.6705
PNN	PABPC1	P11940	0.6687
PNN	ZNF146	Q15072	0.6558
PNN	EIF3E	P60228	0.6505
PNN	POLR3F	Q9H1D9	0.6503
PNN	U2SURP	O15042	0.6445
PNN	CDC5L	Q99459	0.6432
PNN	NPM1	P06748	0.6428
PNN	SF3B1	O75533	0.6376
PNN	PPL	O60437	0.6374
PNN	YWHAE	P62258	0.6341
PNN	HNRNPH3	P31942	0.6319
PNN	KRT8	P05787	0.6277
PNN	SRSF1	Q07955	0.6199
PNN	PRKDC	P78527	0.6181
PNN	UBR5	O95071	0.6133
PNN	USP8 (Ubiquitin carboxyl-terminal hydrolase 8)	P40818	0.6102
PNN	CLK2	P49760	0.6039
PNN	DDX39B	Q13838	0.598
PNN	YWHAZ	P63104	0.5974
PNN	UPF2	Q9HAU5	0.5914
PNN	PRPF40A	O75400	0.5886
PNN	NRIP1	P48552	0.5868
PNN	GRB2	P62993	0.5855
PNN	SATB1	Q01826	0.5724
PNN	ARRB1	P49407	0.5684
PNN	CEBPZ	Q03701	0.5683
PNN	USP1	O94782	0.5626
PNN	TOPORS	Q9NS56	0.5578
PNN	ZNF217	O75362	0.5554
PNN	DMD	P11532	0.5512
PNN	MAPK14	Q16539	0.5511
PNN	RBMX	P38159	0.5458
PNN	LUC7L2	Q9Y383	0.5426
PNN	HNRNPA3	P51991	0.539
PNN	PRKAA1	Q13131	0.5356
PNN	LBR	Q14739	0.5356
PNN	RPS6KA3	P51812	0.5335
PNN	SRSF7	Q16629	0.5323
PNN	YWHAH	Q04917	0.53
PNN	MARK3	P27448	0.5298
PNN	CLK3	P49761	0.529
PNN	BCAS2	O75934	0.5235
PNN	BBS4	Q96RK4	0.5171
PNN	MYCBP2	O75592	0.5169
PNN	TCERG1	O14776	0.5166
PNN	SFN	P31947	0.5143
PNN	TLK1	Q9UKI8	0.5123
PNN	CASP3	P42574	0.5108
PNN	HSPD1	P10809	0.5094
PNN	MFAP1	P55081	0.5
PNN	TIA1	P31483	0.4972
PNN	MAPK8	P45983	0.4963
PNN	KLF13	Q9Y2Y9	0.4949
PNN	RNPS1	Q15287	0.4944
PNN	LSM14A	Q8ND56	0.4915
PNN	FRG1	Q14331	0.4913
PNN	STRAP	Q9Y3F4	0.4906
PNN	HNRNPH1	P31943	0.4844
PNN	TRA2A	Q13595	0.4836
PNN	DNAJB6	O75190	0.4836
PNN	MBD4	O95243	0.4826
PNN	MAPK3	P27361	0.482
PNN	EIF4E	P06730	0.4807
PNN	DENND4A	Q7Z401	0.4762
PNN	CTBP1	Q13363	0.4758
PNN	MPHOSPH10	O00566	0.4754
PNN	SRSF5	Q13243	0.4704
PNN	SF3B3	Q15393	0.4658
PNN	TJP2	Q9UDY2	0.4651
PNN	SMC5	Q8IY18	0.4649
PNN	ACIN1	Q9UKV3	0.4624
PNN	HDAC1 (HD1)	Q13547	0.4623
PNN	NAP1L1	P55209	0.4565
PNN	PUF60	Q9UHX1	0.455
PNN	ACTL6B	O94805	0.4496
PNN	TGIF1	Q15583	0.4461
PNN	RPL17	P18621	0.4427
PNN	CDK17	Q00537	0.4411
PNN	ZNF638	Q14966	0.4405
PNN	RAB11FIP2	Q7L804	0.438
PNN	TCF7L2	Q9NQB0	0.4374
PNN	SLC25A36	Q96CQ1	0.4359
PNN	NBN	O60934	0.4352
PNN	KIF5B	P33176	0.4335
PNN	SCAF8	Q9UPN6	0.4298
PNN	KLF4	O43474	0.4199
PNN	COL17A1	Q9UMD9	0.4193
PNN	KAT2B	Q92831	0.4174
PNN	CBX4	O00257	0.4168
PNN	WEE1	P30291	0.4114
PNN	MECOM (MDS1 and EVI1 complex locus protein EVI1)	Q03112	0.4111
PNN	NIPBL	Q6KC79	0.4093
PNN	ZC3H15	Q8WU90	0.4085
PNN	MAPK1	P28482	0.4079
PNN	CNBP	P62633	0.4068
PNN	PRPF3	O43395	0.4068
PNN	EPB41L2	O43491	0.4065
PNN	HIC1	Q14526	0.4064
PNN	SNRNP200	O75643	0.4063
PNN	BBS2	Q9BXC9	0.4058
PNN	EP300	Q09472	0.4043
PNN	BBS7	Q8IWZ6	0.4041
PNN	PIK3C3	Q8NEB9	0.4022
PNN	SUZ12	Q15022	0.402
PNN	YAP1	P46937	0.402
PNN	CRTC2	Q53ET0	0.4009
PNN	DYRK1A	Q13627	0.3996
PNN	IKZF4	Q9H2S9	0.3994
PNN	PSMC6	P62333	0.3971
PNN	APC	P25054	0.3965
PNN	CDK1	P06493	0.3949
PNN	DFFA	O00273	0.3928
PNN	CLASP1	Q7Z460	0.3915
PNN	AKAP17A	Q02040	0.3912
PNN	UBA2	Q9UBT2	0.3908
PNN	RPS7	P62081	0.3904
PNN	CAMK2A	Q9UQM7	0.3886
PNN	BBS1	Q8NFJ9	0.3879
PNN	CREBBP	Q92793	0.3868
PNN	CEP57	Q86XR8	0.3862
PNN	ARHGEF7	Q14155	0.3861
PNN	PDS5A	Q29RF7	0.3835
PNN	C16orf80	Q9Y6A4	0.3832
PNN	RABEP1	Q15276	0.383
PNN	MDM4	O15151	0.3798
PNN	PNISR	Q8TF01	0.3785
PNN	BTAF1	O14981	0.3785
PNN	EDC3	Q96F86	0.3768
PNN	TUBB	P07437	0.3768
PNN	PARD3	Q8TEW0	0.3763
PNN	TSC1	Q92574	0.3744
PNN	LSR	Q86X29	0.3732
PNN	ANKS1A	Q92625	0.3728
PNN	METTL3	Q86U44	0.3709
PNN	OSBPL3	Q9H4L5	0.3707
PNN	TRADD	Q15628	0.3696
PNN	PRPF19	Q9UMS4	0.3664
PNN	ING1	Q9UK53	0.3662
PNN	RAI14	Q9P0K7	0.3656
PNN	NCKAP1	Q9Y2A7	0.3648
PNN	TNFAIP3	P21580	0.3646
PNN	THUMPD1	Q9NXG2	0.3639
PNN	ERCC5	P28715	0.3632
PNN	HDAC7	Q8WUI4	0.3631
PNN	FRMD6	Q96NE9	0.3618
PNN	SRGAP2	O75044	0.3613
PNN	CTPS	P17812	0.3606
PNN	WNK1	Q9H4A3	0.3593
PNN	EPB41L3	Q9Y2J2	0.3571
PNN	CDK16	Q00536	0.3566
PNN	ERC1	Q8IUD2	0.3558
PNN	MED6	O75586	0.3541
PNN	FOXO3	O43524	0.3525
PNN	AKAP13	Q12802	0.3523
PNN	PLRG1	O43660	0.3523
PNN	KIF1B	O60333	0.3523
PNN	C19orf29	Q8WUQ7	0.352
PNN	WAPAL	Q7Z5K2	0.3515
PNN	IRS2	Q9Y4H2	0.3513
PNN	CHEK1	O14757	0.3502
PNN	PRKRIR	O43422	0.35
PNN	PRKCA (PKC-alpha)	P17252	0.3499
PNN	BRCA1	P38398	0.3491
PNN	RALGPS2	Q86X27	0.349
PNN	MLTK	Q9NYL2	0.3482
PNN	U2AF1	Q01081	0.3479
PNN	SHCBP1	Q8NEM2	0.3475
PNN	SET	Q01105	0.3472
PNN	HDAC4	P56524	0.3465
PNN	TIAM1	Q13009	0.3465
PNN	THRAP3	Q9Y2W1	0.3463
PNN	RACGAP1	Q9H0H5	0.3462
PNN	BRAF	P15056	0.346
PNN	KIF5C	O60282	0.3456
PNN	EML3	Q32P44	0.3451
PNN	SH3BP4	Q9P0V3	0.345
PNN	NCKIPSD	Q9NZQ3	0.3447
PNN	NCBP2	P52298	0.3444
PNN	PPFIBP1	Q86W92	0.3431
PNN	CCNY	Q8ND76	0.343
PNN	SAMD4A	Q9UPU9	0.3427
PNN	REV3L (DNA polymerase zeta catalytic subunit)	O60673	0.3426
PNN	LARP1	Q6PKG0	0.3425
PNN	IGF1R (Insulin-like growth factor 1 receptor)	P08069	0.3424
PNN	CENPJ	Q9HC77	0.3423
PNN	TARDBP	Q13148	0.3422
PNN	RASSF8	Q8NHQ8	0.3421
PNN	CRTC3	Q6UUV7	0.3415
PNN	PFKFB2	O60825	0.3411
PNN	ATP5B (ATP synthase subunit beta, mitochondrial)	P06576	0.3411
PNN	MICALL1	Q8N3F8	0.3409
PNN	RASAL2	Q9UJF2	0.3404
PNN	YTHDC1	Q96MU7	0.3403
PNN	CFL1	P23528	0.3402
PNN	FAM82A2	Q96TC7	0.3401
PNN	HSPB6	O14558	0.3396
PNN	KIAA0930	Q6ICG6	0.3389
PNN	ZNF273	Q14593	0.3385
PNN	SH3BP5L	Q7L8J4	0.3385
PNN	ARHGEF2	Q92974	0.3382
PNN	KIF1C	O43896	0.3368
PNN	PTPN3	P26045	0.3368
PNN	PI4KB	Q9UBF8	0.3366
PNN	SRP54	P61011	0.3354
PNN	MDM2	Q00987	0.3353
PNN	GBF1	Q92538	0.335
PNN	PAK4	O96013	0.3348
PNN	UFL1	O94874	0.3339
PNN	TSC2	P49815	0.3339
PNN	DDX18	Q9NVP1	0.333
PNN	KLC3	Q6P597	0.3329
PNN	SYF2	O95926	0.3325
PNN	RABGEF1	Q9UJ41	0.3324
PNN	CGN	Q9P2M7	0.3323
PNN	TMEM102	Q8N9M5	0.3323
PNN	PAPOLA	P51003	0.3312
PNN	SNRPB2	P08579	0.3312
PNN	BAIAP2	Q9UQB8	0.3311
PNN	SNW1	Q13573	0.331
PNN	SAMD4B	Q5PRF9	0.331
PNN	PHF3	Q92576	0.331
PNN	GSK3A	P49840	0.3307
PNN	MPRIP	Q6WCQ1	0.3305
PNN	KLC2	Q9H0B6	0.3303
PNN	PIBF1	Q8WXW3	0.33
PNN	BIRC2	Q13490	0.3294
PNN	PAK1	Q13153	0.3292
PNN	CENPC1	Q03188	0.3282
PNN	PPP2R5E	Q16537	0.3271
PNN	RNMT	O43148	0.3261
PNN	SCFD1	Q8WVM8	0.3248
PNN	RPS24	P62847	0.3245
PNN	NSA2	O95478	0.3245
PNN	RBM28	Q9NW13	0.3235
PNN	MATR3	P43243	0.3235
PNN	CLK1	P49759	0.3235
PNN	EFHA1	Q8IYU8	0.3222
PNN	SNRNP70	P08621	0.322
PNN	CBL	P22681	0.322
PNN	TAF7	Q15545	0.3217
PNN	MAGOH	P61326	0.3212
PNN	CDC40	O60508	0.3208
PNN	ARAF	P10398	0.3199
PNN	MLLT4	P55196	0.3191
PNN	ZC3H11A	O75152	0.3185
PNN	BAD	Q92934	0.318
PNN	RCOR1	Q9UKL0	0.3166
PNN	THOC1	Q96FV9	0.3165
PNN	CBX3	Q13185	0.3137
PNN	PARP2	Q9UGN5	0.3133
PNN	KTN1	Q86UP2	0.3122
PNN	NUP133	Q8WUM0	0.3121
PNN	SMCHD1	A6NHR9	0.3111
PNN	SUB1	P53999	0.3103
PNN	SMNDC1	O75940	0.3102
PNN	CBX3	A4D177	0.3101
PNN	TTF2	Q9UNY4	0.3098
PNN	EXOSC8	Q96B26	0.3098
PNN	C1orf63	Q9BUV0	0.3096
PNN	SKIV2L2	P42285	0.3096
PNN	DDX46	Q7L014	0.3085
PNN	XRCC5	P13010	0.307
PNN	GEMIN2	O14893	0.3067
PNN	RAD21	O60216	0.3067
PNN	HAT1	O14929	0.3054
PNN	KHDRBS1	Q07666	0.3049
PNN	MAPK1IP1L	Q8NDC0	0.3036
PNN	PPIE (PPIase E)	Q9UNP9	0.3031
PNN	WBP4	O75554	0.3031
PNN	AQR	O60306	0.3029
PNN	DDX50	Q9BQ39	0.3026
PNN	NAE1	Q13564	0.3023
PNN	RPL22	P35268	0.3022
PNN	U2AF2	P26368	0.3021
PNN	FNBP4	Q8N3X1	0.3003
PNN	BAZ1A	Q9NRL2	0.2998
PNN	NACA	Q13765	0.2987
PNN	NASP	P49321	0.2979
PNN	PPIL3 (PPIase)	Q9H2H8	0.2974
PNN	UTP3	Q9NQZ2	0.2971
PNN	UPF3A	Q9H1J1	0.296
PNN	BUB3	O43684	0.2945
PNN	SNRPE	P62304	0.2942
PNN	HNRNPD	Q14103	0.2942
PNN	TOP2B (DNA topoisomerase 2-beta)	Q02880	0.2927
PNN	SYNCRIP	O60506	0.2927
PNN	PPIL1	Q9Y3C6	0.2919
PNN	SNRPA	P09012	0.2917
PNN	PIKFYVE	Q9Y2I7	0.2916
PNN	RRP1B	Q14684	0.2911
PNN	HNRPDL	O14979	0.2908
PNN	PPP2CA (PP2A-alpha)	P67775	0.2893
PNN	PPP1CC (PP-1G)	P36873	0.2893
PNN	PSMA4 (Proteasome subunit alpha type-4)	P25789	0.2886
PNN	DNAJC2	Q99543	0.2883
PNN	SENP6	Q9GZR1	0.2879
PNN	ZNF292	O60281	0.2879
PNN	HNRNPK	P61978	0.2878
PNN	PRRC2C	Q9Y520	0.2876
PNN	CTCF	P49711	0.2859
PNN	FANCL	Q9NW38	0.2848
PNN	ACAP2	Q15057	0.2848
PNN	DMTF1	Q9Y222	0.2843
PNN	IPO7	O95373	0.2825
PNN	THOC2	Q8NI27	0.2816
PNN	PRPF38A	Q8NAV1	0.2795
PNN	UBE2N	P61088	0.2794
PNN	TCF12	Q99081	0.2793
PNN	EIF3A	Q14152	0.2791
PNN	ZFC3H1	O60293	0.2788
PNN	SUGP1	Q8IWZ8	0.2783
PNN	UBXN4	Q92575	0.2782
PNN	SNX2	O60749	0.2781
PNN	SRSF6	Q13247	0.2777
PNN	FXR1	P51114	0.2773
PNN	IFRD1	O00458	0.2758
PNN	RALGAPA1	Q6GYQ0	0.2757
PNN	TTC37	Q6PGP7	0.2752
PNN	PIK3R1	P27986	0.2748
PNN	SCAF11	Q99590	0.2747
PNN	CHD9	Q3L8U1	0.2746
PNN	DLD (Dihydrolipoyl dehydrogenase, mitochondrial)	P09622	0.2735
PNN	ATP11B	Q9Y2G3	0.2734
PNN	POLR2B (DNA-directed RNA polymerase II subunit RPB2)	P30876	0.2733
PNN	DUT	P33316	0.2732
PNN	LSM3	P62310	0.2725
PNN	TCEA1	P23193	0.2723
PNN	NUP153	P49790	0.2722
PNN	SP3	Q02447	0.2719
PNN	PNRC2	Q9NPJ4	0.2711
PNN	DGCR14	Q96DF8	0.2711
PNN	CWC15	Q9P013	0.2704
PNN	PMS1	P54277	0.2703
PNN	CDC16	Q13042	0.269
PNN	ADNP	Q9H2P0	0.269
PNN	PUM2	Q8TB72	0.2689
PNN	RBM8A	Q9Y5S9	0.2688
PNN	CAND1	Q86VP6	0.2688
PNN	LRPPRC	P42704	0.2685
PNN	DDX1	Q92499	0.2676
PNN	SMAP	O00193	0.2674
PNN	PPP1R8	Q12972	0.2673
PNN	RMP	O94763	0.2672
PNN	ATR	Q13535	0.2671
PNN	RNF6	Q9Y252	0.267
PNN	TP53	P04637	0.2657
PNN	WDR83	Q9BRX9	0.265
PNN	ISY1	Q9ULR0	0.2648
PNN	RPL6	Q02878	0.2647
PNN	NFYA	P23511	0.2628
PNN	TPP2	P29144	0.262
PNN	AIMP1	Q12904	0.2599
PNN	ARGLU1	Q9NWB6	0.2586
PNN	HNRNPM	P52272	0.2585
PNN	HSP90AA1	P07900	0.2576
PNN	MSH6	P52701	0.2568
PNN	PSMA3 (Proteasome subunit alpha type-3)	P25788	0.2564
PNN	STAG2	Q8N3U4	0.2554
PNN	ZZZ3	Q8IYH5	0.2552
PNN	SUPT16H	Q9Y5B9	0.2537
PNN	ANKRD17	O75179	0.2529
PNN	PPP1R12A	O14974	0.2526
PNN	ATAD2B	Q9ULI0	0.2519
PNN	OFD1	O75665	0.2505
