# Supplementary material for: Pinin Induces Epithelial-to-Mesenchymal Transition in Hepatocellular Carcinoma by Regulating m6A Modification
Source: J Oncol. 2021 Dec 7;2021:7529164. doi: 10.1155/2021/7529164 (PMC8670902; doi:10.1155/2021/7529164)
Supplement: Supplementary Materials — Figure S1: statistical data for the difference between lanes about western blot assay, related Figures 2 and 5. Table S1: the protein list interacting with Pinin predicted by fpclass, related Figure 3. Table S2: MS data of interaction proteomics of METTL3, related Figure 3. [file 7529164.f1.zip › 7529164.f1/Table S2 MS data of interaction proteomics of METTL3.txt]

Accession	Description	Score	Coverage	# Proteins	# Unique Peptides	# Peptides	# PSMs	# AAs	MW [kDa]	calc. pI
Q86U44	N6-adenosine-methyltransferase 70 kDa subunit OS=Homo sapiens GN=METTL3 PE=1 SV=2 - [MTA70_HUMAN]	2410.86	53.97	7	30	31	649	580	64.4	6.42
P08670	Vimentin OS=Homo sapiens GN=VIM PE=1 SV=4 - [VIME_HUMAN]	2291.16	69.96	21	34	42	695	466	53.6	5.12
B7ZAF0	Tubulin beta chain OS=Homo sapiens PE=2 SV=1 - [B7ZAF0_HUMAN]	814.82	48.92	19	3	20	232	415	46.5	4.93
B2RA03	cDNA, FLJ94640, highly similar to Homo sapiens keratin 18 (KRT18), mRNA OS=Homo sapiens PE=2 SV=1 - [B2RA03_HUMAN]	752.67	47.67	10	20	22	220	430	48.0	5.38
P68371	Tubulin beta-4B chain OS=Homo sapiens GN=TUBB4B PE=1 SV=1 - [TBB4B_HUMAN]	704.20	48.99	35	3	20	202	445	49.8	4.89
Q53GA7	Tubulin alpha chain (Fragment) OS=Homo sapiens PE=2 SV=1 - [Q53GA7_HUMAN]	678.51	39.42	26	2	14	194	449	49.8	5.14
B3KPS3	Tubulin alpha chain OS=Homo sapiens PE=2 SV=1 - [B3KPS3_HUMAN]	670.26	46.63	33	2	14	192	416	46.2	5.12
Q86U44	N6-adenosine-methyltransferase 70 kDa subunit OS=Homo sapiens GN=METTL3 PE=1 SV=2 - [MTA70_HUMAN]	554.69	55.17	7	25	26	162	580	64.4	6.42
B3KN06	Coronin OS=Homo sapiens PE=2 SV=1 - [B3KN06_HUMAN]	458.22	31.86	16	14	14	139	474	53.2	6.93
Q13509	Tubulin beta-3 chain OS=Homo sapiens GN=TUBB3 PE=1 SV=2 - [TBB3_HUMAN]	452.01	32.89	16	2	14	137	450	50.4	4.93
P04259	Keratin, type II cytoskeletal 6B OS=Homo sapiens GN=KRT6B PE=1 SV=5 - [K2C6B_HUMAN]	392.12	36.52	3	2	22	125	564	60.0	8.00
P11021	78 kDa glucose-regulated protein OS=Homo sapiens GN=HSPA5 PE=1 SV=2 - [GRP78_HUMAN]	376.54	42.20	2	22	24	113	654	72.3	5.16
O60568	Procollagen-lysine,2-oxoglutarate 5-dioxygenase 3 OS=Homo sapiens GN=PLOD3 PE=1 SV=1 - [PLOD3_HUMAN]	374.67	32.93	11	20	20	126	738	84.7	6.05
B4DP54	Tubulin beta chain OS=Homo sapiens PE=2 SV=1 - [B4DP54_HUMAN]	349.57	27.99	15	2	11	101	418	46.7	4.89
P35579	Myosin-9 OS=Homo sapiens GN=MYH9 PE=1 SV=4 - [MYH9_HUMAN]	341.28	26.33	17	40	41	107	1960	226.4	5.60
P02533	Keratin, type I cytoskeletal 14 OS=Homo sapiens GN=KRT14 PE=1 SV=4 - [K1C14_HUMAN]	320.58	45.97	16	5	22	97	472	51.5	5.16
P13647	Keratin, type II cytoskeletal 5 OS=Homo sapiens GN=KRT5 PE=1 SV=3 - [K2C5_HUMAN]	311.93	45.93	9	17	31	106	590	62.3	7.74
P68104	Elongation factor 1-alpha 1 OS=Homo sapiens GN=EEF1A1 PE=1 SV=1 - [EF1A1_HUMAN]	284.26	26.84	36	2	9	91	462	50.1	9.01
P08729	Keratin, type II cytoskeletal 7 OS=Homo sapiens GN=KRT7 PE=1 SV=5 - [K2C7_HUMAN]	283.91	40.94	9	11	22	88	469	51.4	5.48
B4DRR0	cDNA FLJ53910, highly similar to Keratin, type II cytoskeletal 6A OS=Homo sapiens PE=2 SV=1 - [B4DRR0_HUMAN]	282.21	41.12	8	2	24	95	535	57.8	8.00
P35579	Myosin-9 OS=Homo sapiens GN=MYH9 PE=1 SV=4 - [MYH9_HUMAN]	279.18	16.22	14	27	31	82	1960	226.4	5.60
Q04695	Keratin, type I cytoskeletal 17 OS=Homo sapiens GN=KRT17 PE=1 SV=2 - [K1C17_HUMAN]	245.94	41.67	17	7	21	72	432	48.1	5.02
P08779	Keratin, type I cytoskeletal 16 OS=Homo sapiens GN=KRT16 PE=1 SV=4 - [K1C16_HUMAN]	242.58	39.75	18	6	19	75	473	51.2	5.05
O43707	Alpha-actinin-4 OS=Homo sapiens GN=ACTN4 PE=1 SV=2 - [ACTN4_HUMAN]	240.47	30.08	16	16	22	71	911	104.8	5.44
P02533	Keratin, type I cytoskeletal 14 OS=Homo sapiens GN=KRT14 PE=1 SV=4 - [K1C14_HUMAN]	237.43	39.19	28	6	16	78	472	51.5	5.16
P80723	Brain acid soluble protein 1 OS=Homo sapiens GN=BASP1 PE=1 SV=2 - [BASP1_HUMAN]	235.67	69.60	2	12	12	69	227	22.7	4.63
P04259	Keratin, type II cytoskeletal 6B OS=Homo sapiens GN=KRT6B PE=1 SV=5 - [K2C6B_HUMAN]	232.54	21.28	4	1	13	77	564	60.0	8.00
P05186	Alkaline phosphatase, tissue-nonspecific isozyme OS=Homo sapiens GN=ALPL PE=1 SV=4 - [PPBT_HUMAN]	210.31	36.64	6	13	13	60	524	57.3	6.67
P12814	Alpha-actinin-1 OS=Homo sapiens GN=ACTN1 PE=1 SV=2 - [ACTN1_HUMAN]	208.19	31.73	32	15	21	60	892	103.0	5.41
Q0IIN1	Keratin 77 OS=Homo sapiens GN=KRT77 PE=1 SV=1 - [Q0IIN1_HUMAN]	198.67	11.59	4	2	7	47	578	61.8	5.85
P13647	Keratin, type II cytoskeletal 5 OS=Homo sapiens GN=KRT5 PE=1 SV=3 - [K2C5_HUMAN]	197.46	28.47	10	10	20	71	590	62.3	7.74
P11142	Heat shock cognate 71 kDa protein OS=Homo sapiens GN=HSPA8 PE=1 SV=1 - [HSP7C_HUMAN]	197.02	32.97	27	14	18	56	646	70.9	5.52
B4DMA2	cDNA FLJ54023, highly similar to Heat shock protein HSP 90-beta OS=Homo sapiens PE=2 SV=1 - [B4DMA2_HUMAN]	194.57	29.45	21	9	18	62	686	79.1	5.02
P08779	Keratin, type I cytoskeletal 16 OS=Homo sapiens GN=KRT16 PE=1 SV=4 - [K1C16_HUMAN]	192.98	30.23	29	5	13	63	473	51.2	5.05
B4DRR0	cDNA FLJ53910, highly similar to Keratin, type II cytoskeletal 6A OS=Homo sapiens PE=2 SV=1 - [B4DRR0_HUMAN]	161.60	28.41	13	3	17	56	535	57.8	8.00
P0DMV9	Heat shock 70 kDa protein 1B OS=Homo sapiens GN=HSPA1B PE=1 SV=1 - [HS71B_HUMAN]	150.15	26.83	23	13	15	44	641	70.0	5.66
B3KWQ6	cDNA FLJ43599 fis, clone SMINT2017781, highly similar to PERIPHERIN OS=Homo sapiens PE=2 SV=1 - [B3KWQ6_HUMAN]	148.16	8.94	4	1	6	44	470	53.6	5.47
A8K2H9	cDNA FLJ78503, highly similar to Homo sapiens keratin 13 (KRT13), transcript variant 1, mRNA OS=Homo sapiens PE=2 SV=1 - [A8K2H9_HUMAN]	147.26	14.85	5	2	7	46	458	49.5	4.92
Q5XKE5	Keratin, type II cytoskeletal 79 OS=Homo sapiens GN=KRT79 PE=1 SV=2 - [K2C79_HUMAN]	139.07	18.50	4	1	12	47	535	57.8	7.20
P07900	Heat shock protein HSP 90-alpha OS=Homo sapiens GN=HSP90AA1 PE=1 SV=5 - [HS90A_HUMAN]	137.44	20.90	20	6	14	46	732	84.6	5.02
Q9HB55	Cytochrome P450 3A43 OS=Homo sapiens GN=CYP3A43 PE=1 SV=1 - [CP343_HUMAN]	137.40	2.39	1	1	1	50	503	57.6	8.10
P11142	Heat shock cognate 71 kDa protein OS=Homo sapiens GN=HSPA8 PE=1 SV=1 - [HSP7C_HUMAN]	131.84	24.61	29	10	14	41	646	70.9	5.52
Q9Y608	Leucine-rich repeat flightless-interacting protein 2 OS=Homo sapiens GN=LRRFIP2 PE=1 SV=1 - [LRRF2_HUMAN]	129.50	20.25	7	15	15	36	721	82.1	6.95
O95678	Keratin, type II cytoskeletal 75 OS=Homo sapiens GN=KRT75 PE=1 SV=2 - [K2C75_HUMAN]	126.12	17.06	3	1	12	41	551	59.5	7.74
O43707	Alpha-actinin-4 OS=Homo sapiens GN=ACTN4 PE=1 SV=2 - [ACTN4_HUMAN]	125.98	27.77	18	4	18	39	911	104.8	5.44
A0A087X173	Adenosine receptor A1 OS=Homo sapiens GN=ADORA1 PE=1 SV=1 - [A0A087X173_HUMAN]	121.58	6.67	5	1	1	50	210	24.1	8.44
Q8NBJ5	Procollagen galactosyltransferase 1 OS=Homo sapiens GN=COLGALT1 PE=1 SV=1 - [GT251_HUMAN]	116.67	27.33	7	15	15	45	622	71.6	7.31
Q05639	Elongation factor 1-alpha 2 OS=Homo sapiens GN=EEF1A2 PE=1 SV=1 - [EF1A2_HUMAN]	115.78	21.60	6	1	8	39	463	50.4	9.03
P19012	Keratin, type I cytoskeletal 15 OS=Homo sapiens GN=KRT15 PE=1 SV=3 - [K1C15_HUMAN]	114.59	19.30	13	2	10	35	456	49.2	4.77
B3GQS7	Mitochondrial heat shock 60kD protein 1 variant 1 OS=Homo sapiens GN=HSPD1 PE=2 SV=1 - [B3GQS7_HUMAN]	112.20	27.42	16	7	10	30	569	60.6	6.04
P05187	Alkaline phosphatase, placental type OS=Homo sapiens GN=ALPP PE=1 SV=2 - [PPB1_HUMAN]	110.65	27.48	5	11	11	34	535	57.9	6.29
B3KNW9	cDNA FLJ30616 fis, clone CTONG2001320, highly similar to RNA methyltransferase NCOA6IP (EC 2.1.1.-) OS=Homo sapiens PE=2 SV=1 - [B3KNW9_HUMAN]	110.62	3.00	3	1	2	46	566	62.7	5.25
F8VQE1	LIM domain and actin-binding protein 1 OS=Homo sapiens GN=LIMA1 PE=1 SV=1 - [F8VQE1_HUMAN]	109.59	23.24	7	10	10	35	598	66.9	5.80
Q02809	Procollagen-lysine,2-oxoglutarate 5-dioxygenase 1 OS=Homo sapiens GN=PLOD1 PE=1 SV=2 - [PLOD1_HUMAN]	108.58	21.32	5	8	12	36	727	83.5	6.95
Q53G99	Beta actin variant (Fragment) OS=Homo sapiens PE=2 SV=1 - [Q53G99_HUMAN]	108.17	37.87	90	4	11	34	375	41.7	5.59
P08727	Keratin, type I cytoskeletal 19 OS=Homo sapiens GN=KRT19 PE=1 SV=4 - [K1C19_HUMAN]	106.91	16.75	10	1	10	38	400	44.1	5.14
Q16643	Drebrin OS=Homo sapiens GN=DBN1 PE=1 SV=4 - [DREB_HUMAN]	106.09	17.41	7	8	8	28	649	71.4	4.45
Q7Z3Y7	Keratin, type I cytoskeletal 28 OS=Homo sapiens GN=KRT28 PE=1 SV=2 - [K1C28_HUMAN]	105.68	8.19	11	1	5	36	464	50.5	5.47
Q5HY54	Filamin-A OS=Homo sapiens GN=FLNA PE=1 SV=1 - [Q5HY54_HUMAN]	104.94	14.00	17	21	23	37	2607	276.4	6.05
A8K2H9	cDNA FLJ78503, highly similar to Homo sapiens keratin 13 (KRT13), transcript variant 1, mRNA OS=Homo sapiens PE=2 SV=1 - [A8K2H9_HUMAN]	104.25	12.88	5	1	7	35	458	49.5	4.92
H3BTN5	Pyruvate kinase (Fragment) OS=Homo sapiens GN=PKM PE=1 SV=1 - [H3BTN5_HUMAN]	100.23	35.46	20	12	13	32	485	53.0	6.84
Q8WZ42	Titin OS=Homo sapiens GN=TTN PE=1 SV=4 - [TITIN_HUMAN]	99.47	1.67	9	35	38	42	34350	3813.7	6.35
A0A024R889	Spectrin, alpha, non-erythrocytic 1 (Alpha-fodrin), isoform CRA_g OS=Homo sapiens GN=SPTAN1 PE=4 SV=1 - [A0A024R889_HUMAN]	98.16	12.03	11	22	23	34	2452	282.1	5.34
O75955	Flotillin-1 OS=Homo sapiens GN=FLOT1 PE=1 SV=3 - [FLOT1_HUMAN]	97.25	39.81	23	15	15	29	427	47.3	7.49
B3KSG3	cDNA FLJ36152 fis, clone TESTI2025403, highly similar to Actin-binding LIM protein 1 OS=Homo sapiens PE=2 SV=1 - [B3KSG3_HUMAN]	94.98	29.19	9	11	11	31	531	60.2	8.38
D6W5C0	Spectrin beta chain OS=Homo sapiens GN=SPTBN1 PE=3 SV=1 - [D6W5C0_HUMAN]	89.47	11.81	11	20	21	34	2278	264.3	5.58
Q60FE6	Filamin A OS=Homo sapiens GN=FLNA PE=2 SV=1 - [Q60FE6_HUMAN]	88.56	11.06	13	1	21	30	2612	277.3	6.05
J3QKK1	Fructose-bisphosphate aldolase C (Fragment) OS=Homo sapiens GN=ALDOC PE=1 SV=1 - [J3QKK1_HUMAN]	87.31	10.66	12	1	1	37	122	13.3	7.34
Q5HY54	Filamin-A OS=Homo sapiens GN=FLNA PE=1 SV=1 - [Q5HY54_HUMAN]	87.11	11.12	11	1	21	29	2607	276.4	6.05
B3KTA3	Fascin OS=Homo sapiens PE=2 SV=1 - [B3KTA3_HUMAN]	86.35	23.31	6	8	8	28	472	52.2	7.65
F8J2B5	LIM domain only 7 protein OS=Homo sapiens GN=LMO7 PE=2 SV=1 - [F8J2B5_HUMAN]	83.53	16.06	16	17	17	30	1631	186.1	7.18
P25705	ATP synthase subunit alpha, mitochondrial OS=Homo sapiens GN=ATP5A1 PE=1 SV=1 - [ATPA_HUMAN]	82.17	21.88	8	9	9	24	553	59.7	9.13
Q15149	Plectin OS=Homo sapiens GN=PLEC PE=1 SV=3 - [PLEC_HUMAN]	81.58	6.00	4	17	22	31	4684	531.5	5.96
Q15149	Plectin OS=Homo sapiens GN=PLEC PE=1 SV=3 - [PLEC_HUMAN]	77.72	5.66	4	19	19	29	4684	531.5	5.96
B4E337	cDNA FLJ58087, highly similar to Alpha-actinin-4 OS=Homo sapiens PE=2 SV=1 - [B4E337_HUMAN]	76.75	33.27	13	1	14	25	562	64.1	6.30
Q9BRZ2	E3 ubiquitin-protein ligase TRIM56 OS=Homo sapiens GN=TRIM56 PE=1 SV=3 - [TRI56_HUMAN]	76.58	3.84	1	2	2	33	755	81.4	7.74
Q01546	Keratin, type II cytoskeletal 2 oral OS=Homo sapiens GN=KRT76 PE=1 SV=2 - [K22O_HUMAN]	75.68	10.19	2	1	7	26	638	65.8	8.12
B7Z4V2	cDNA FLJ51907, highly similar to Stress-70 protein, mitochondrial OS=Homo sapiens PE=2 SV=1 - [B7Z4V2_HUMAN]	74.04	19.10	12	10	10	24	665	72.4	5.94
B2RCQ9	cDNA, FLJ96225, highly similar to Homo sapiens heat shock 70kDa protein 1-like (HSPA1L), mRNA OS=Homo sapiens PE=2 SV=1 - [B2RCQ9_HUMAN]	73.86	10.14	13	1	5	21	641	70.3	5.81
B7Z565	cDNA FLJ54739, highly similar to Alpha-actinin-1 OS=Homo sapiens PE=2 SV=1 - [B7Z565_HUMAN]	73.61	18.86	23	5	11	23	822	94.7	5.69
Q8IVT2	Mitotic interactor and substrate of PLK1 OS=Homo sapiens GN=MISP PE=1 SV=1 - [MISP_HUMAN]	71.95	26.22	1	13	13	25	679	75.3	6.83
P12035	Keratin, type II cytoskeletal 3 OS=Homo sapiens GN=KRT3 PE=1 SV=3 - [K2C3_HUMAN]	69.94	11.31	4	1	9	25	628	64.4	6.48
B4DKR1	MICOS complex subunit MIC60 OS=Homo sapiens PE=2 SV=1 - [B4DKR1_HUMAN]	69.58	14.34	9	2	7	21	746	82.5	6.39
E9PGZ1	Caldesmon OS=Homo sapiens GN=CALD1 PE=1 SV=1 - [E9PGZ1_HUMAN]	69.53	21.83	15	7	8	21	536	61.7	6.11
Q01813	ATP-dependent 6-phosphofructokinase, platelet type OS=Homo sapiens GN=PFKP PE=1 SV=2 - [PFKAP_HUMAN]	67.85	16.84	10	10	11	21	784	85.5	7.55
P49411	Elongation factor Tu, mitochondrial OS=Homo sapiens GN=TUFM PE=1 SV=2 - [EFTU_HUMAN]	67.48	21.90	2	7	7	19	452	49.5	7.61
B7Z8W3	cDNA FLJ53272, highly similar to Homo sapiens LIM domain 7 (LMO7), mRNA OS=Homo sapiens PE=2 SV=1 - [B7Z8W3_HUMAN]	67.43	16.00	15	14	14	23	1275	145.4	7.46
C9JKR2	Albumin, isoform CRA_k OS=Homo sapiens GN=ALB PE=1 SV=1 - [C9JKR2_HUMAN]	67.04	6.47	13	3	3	21	417	47.3	6.35
H0Y7H7	Dedicator of cytokinesis protein 4 (Fragment) OS=Homo sapiens GN=DOCK4 PE=1 SV=1 - [H0Y7H7_HUMAN]	65.82	2.02	12	1	2	27	1389	158.9	7.33
B3KQQ3	cDNA PSEC0016 fis, clone NT2RM1001076, highly similar to Procollagen-lysine,2-oxoglutarate 5-dioxygenase 3 (EC 1.14.11.4) OS=Homo sapiens PE=2 SV=1 - [B3KQQ3_HUMAN]	65.10	15.85	10	11	11	22	738	84.6	6.20
D6W5C0	Spectrin beta chain OS=Homo sapiens GN=SPTBN1 PE=3 SV=1 - [D6W5C0_HUMAN]	64.47	8.87	6	14	16	24	2278	264.3	5.58
C9J406	MICOS complex subunit MIC60 OS=Homo sapiens GN=IMMT PE=1 SV=1 - [C9J406_HUMAN]	64.27	14.11	2	1	6	19	659	73.2	6.07
P11021	78 kDa glucose-regulated protein OS=Homo sapiens GN=HSPA5 PE=1 SV=2 - [GRP78_HUMAN]	63.64	16.82	2	8	10	18	654	72.3	5.16
A4QPB0	IQ motif containing GTPase activating protein 1 OS=Homo sapiens GN=IQGAP1 PE=1 SV=1 - [A4QPB0_HUMAN]	63.45	10.80	22	14	14	22	1657	189.2	6.48
B4DRW1	cDNA FLJ55805, highly similar to Keratin, type II cytoskeletal 4 OS=Homo sapiens PE=2 SV=1 - [B4DRW1_HUMAN]	62.63	15.19	10	1	7	22	474	51.7	6.81
Q04695	Keratin, type I cytoskeletal 17 OS=Homo sapiens GN=KRT17 PE=1 SV=2 - [K1C17_HUMAN]	61.73	21.53	24	3	10	22	432	48.1	5.02
Q14CN4	Keratin, type II cytoskeletal 72 OS=Homo sapiens GN=KRT72 PE=1 SV=2 - [K2C72_HUMAN]	61.65	9.20	5	1	7	25	511	55.8	6.89
B4DPT1	cDNA FLJ51524, highly similar to Set1/Ash2 histone methyltransferase complex subunit ASH2 OS=Homo sapiens PE=2 SV=1 - [B4DPT1_HUMAN]	61.22	5.32	4	1	2	24	489	55.2	8.19
Q16643	Drebrin OS=Homo sapiens GN=DBN1 PE=1 SV=4 - [DREB_HUMAN]	59.15	12.79	6	5	5	16	649	71.4	4.45
A0A024R1X8	Junction plakoglobin, isoform CRA_a OS=Homo sapiens GN=JUP PE=4 SV=1 - [A0A024R1X8_HUMAN]	58.94	9.66	7	5	5	20	745	81.7	6.14
B4DUN9	cDNA FLJ56909, highly similar to Rattus norvegicus nexilin (Nexn), transcript variant s, mRNA OS=Homo sapiens PE=2 SV=1 - [B4DUN9_HUMAN]	58.79	19.49	6	1	9	21	508	61.5	6.61
B7Z6P1	cDNA FLJ53662, highly similar to Actin, alpha skeletal muscle OS=Homo sapiens PE=2 SV=1 - [B7Z6P1_HUMAN]	57.84	20.99	52	1	6	19	343	38.6	5.38
D3DQ79	Nexilin (F actin binding protein), isoform CRA_b OS=Homo sapiens GN=NEXN PE=4 SV=1 - [D3DQ79_HUMAN]	57.70	15.03	8	1	9	21	612	72.9	5.02
B4DDF5	cDNA FLJ55929, highly similar to DNA replication licensing factor MCM7 OS=Homo sapiens PE=2 SV=1 - [B4DDF5_HUMAN]	57.64	18.63	8	9	9	19	655	73.7	7.83
O75083	WD repeat-containing protein 1 OS=Homo sapiens GN=WDR1 PE=1 SV=4 - [WDR1_HUMAN]	57.36	23.60	9	9	9	17	606	66.2	6.65
B7Z992	cDNA FLJ53698, highly similar to Gelsolin OS=Homo sapiens PE=2 SV=1 - [B7Z992_HUMAN]	57.01	13.71	13	6	6	17	715	78.8	6.11
A6PVK0	HCG2019817, isoform CRA_b OS=Homo sapiens GN=RBCK1 PE=1 SV=1 - [A6PVK0_HUMAN]	56.24	4.41	1	1	1	25	340	37.4	8.40
B4DRW1	cDNA FLJ55805, highly similar to Keratin, type II cytoskeletal 4 OS=Homo sapiens PE=2 SV=1 - [B4DRW1_HUMAN]	54.47	6.75	15	1	3	16	474	51.7	6.81
H0YCX0	Translationally-controlled tumor protein (Fragment) OS=Homo sapiens GN=TPT1 PE=1 SV=1 - [H0YCX0_HUMAN]	53.23	15.58	8	1	1	23	77	9.1	6.51
Q12965	Unconventional myosin-Ie OS=Homo sapiens GN=MYO1E PE=1 SV=2 - [MYO1E_HUMAN]	52.82	11.10	8	9	9	17	1108	127.0	8.92
P02545	Prelamin-A/C OS=Homo sapiens GN=LMNA PE=1 SV=1 - [LMNA_HUMAN]	51.66	23.19	10	11	11	18	664	74.1	7.02
Q09666	Neuroblast differentiation-associated protein AHNAK OS=Homo sapiens GN=AHNAK PE=1 SV=2 - [AHNK_HUMAN]	51.16	8.34	11	17	19	23	5890	628.7	6.15
Q9P1T0	AS12 protein (Fragment) OS=Homo sapiens PE=2 SV=1 - [Q9P1T0_HUMAN]	50.98	7.43	1	1	1	21	202	21.9	10.64
A8K7F6	cDNA FLJ78244, highly similar to Homo sapiens eukaryotic translation initiation factor 4A, isoform 1 (EIF4A1), mRNA OS=Homo sapiens PE=2 SV=1 - [A8K7F6_HUMAN]	50.58	22.91	35	7	8	15	406	46.1	5.48
B3KNL2	RuvB-like helicase OS=Homo sapiens GN=RUVBL2 PE=2 SV=1 - [B3KNL2_HUMAN]	50.56	17.95	3	5	6	15	429	47.4	5.52
P17858	ATP-dependent 6-phosphofructokinase, liver type OS=Homo sapiens GN=PFKL PE=1 SV=6 - [PFKAL_HUMAN]	50.26	13.46	7	5	7	17	780	85.0	7.50
Q7Z759	CCT8 protein OS=Homo sapiens GN=CCT8 PE=2 SV=1 - [Q7Z759_HUMAN]	48.05	20.72	5	8	8	16	497	54.1	5.31
P02545	Prelamin-A/C OS=Homo sapiens GN=LMNA PE=1 SV=1 - [LMNA_HUMAN]	47.59	25.60	10	14	14	16	664	74.1	7.02
Q9Y6U3	Adseverin OS=Homo sapiens GN=SCIN PE=1 SV=4 - [ADSV_HUMAN]	47.47	18.46	5	8	8	15	715	80.4	5.71
A0A024R889	Spectrin, alpha, non-erythrocytic 1 (Alpha-fodrin), isoform CRA_g OS=Homo sapiens GN=SPTAN1 PE=4 SV=1 - [A0A024R889_HUMAN]	47.46	7.01	12	12	13	17	2452	282.1	5.34
P13639	Elongation factor 2 OS=Homo sapiens GN=EEF2 PE=1 SV=4 - [EF2_HUMAN]	47.40	10.96	16	9	9	17	858	95.3	6.83
P15924	Desmoplakin OS=Homo sapiens GN=DSP PE=1 SV=3 - [DESP_HUMAN]	46.20	5.85	7	13	14	20	2871	331.6	6.81
B4DFN9	cDNA FLJ54303, highly similar to Heat shock 70 kDa protein 1 OS=Homo sapiens PE=2 SV=1 - [B4DFN9_HUMAN]	45.91	9.79	23	1	4	14	572	62.4	5.69
D6RGG3	Collagen alpha-1(XII) chain OS=Homo sapiens GN=COL12A1 PE=1 SV=1 - [D6RGG3_HUMAN]	45.86	1.37	5	3	3	20	3062	333.0	5.53
H3BQV1	Uncharacterized protein (Fragment) OS=Homo sapiens PE=4 SV=1 - [H3BQV1_HUMAN]	45.53	18.24	10	2	3	20	296	34.2	4.45
Q8N283	Ankyrin repeat domain-containing protein 35 OS=Homo sapiens GN=ANKRD35 PE=2 SV=2 - [ANR35_HUMAN]	45.41	4.90	3	2	3	19	1001	109.9	6.02
Q16352	Alpha-internexin OS=Homo sapiens GN=INA PE=1 SV=2 - [AINX_HUMAN]	44.60	9.82	9	2	5	17	499	55.4	5.40
B7Z4V2	cDNA FLJ51907, highly similar to Stress-70 protein, mitochondrial OS=Homo sapiens PE=2 SV=1 - [B7Z4V2_HUMAN]	44.51	18.50	9	8	9	15	665	72.4	5.94
P06576	ATP synthase subunit beta, mitochondrial OS=Homo sapiens GN=ATP5B PE=1 SV=3 - [ATPB_HUMAN]	43.95	27.41	6	8	9	14	529	56.5	5.40
B4DUR8	T-complex protein 1 subunit gamma OS=Homo sapiens GN=CCT3 PE=1 SV=1 - [B4DUR8_HUMAN]	43.81	15.60	6	6	7	14	500	55.6	5.64
A0A0G2JHC2	Phostensin OS=Homo sapiens GN=PPP1R18 PE=1 SV=1 - [A0A0G2JHC2_HUMAN]	43.79	14.19	2	6	6	14	613	68.0	5.45
Q9NSB2	Keratin, type II cuticular Hb4 OS=Homo sapiens GN=KRT84 PE=2 SV=2 - [KRT84_HUMAN]	43.21	9.83	3	3	10	18	600	64.8	7.56
B4DW52	cDNA FLJ55253, highly similar to Actin, cytoplasmic 1 OS=Homo sapiens PE=2 SV=1 - [B4DW52_HUMAN]	42.58	33.43	69	4	7	14	347	38.6	5.35
C9JL25	60 kDa heat shock protein, mitochondrial (Fragment) OS=Homo sapiens GN=HSPD1 PE=1 SV=1 - [C9JL25_HUMAN]	42.24	40.00	6	1	4	10	175	19.2	9.73
O15231	Zinc finger protein 185 OS=Homo sapiens GN=ZNF185 PE=1 SV=3 - [ZN185_HUMAN]	42.13	22.50	8	9	9	15	689	73.5	7.01
B4E327	cDNA FLJ58830, highly similar to Homo sapiens zinc finger protein 289, ID1 regulated (ZNF289), mRNA OS=Homo sapiens PE=2 SV=1 - [B4E327_HUMAN]	41.72	9.16	1	0	2	18	382	41.2	8.15
P12035	Keratin, type II cytoskeletal 3 OS=Homo sapiens GN=KRT3 PE=1 SV=3 - [K2C3_HUMAN]	41.32	8.44	2	1	5	14	628	64.4	6.48
A0A087X1N7	Nebulin OS=Homo sapiens GN=NEB PE=1 SV=1 - [A0A087X1N7_HUMAN]	40.48	3.06	14	10	17	18	8560	990.2	9.01
B4E192	cDNA FLJ54224, highly similar to Glial fibrillary acidic protein, astrocyte OS=Homo sapiens PE=2 SV=1 - [B4E192_HUMAN]	39.72	14.00	11	3	5	14	407	47.3	5.33
A0A0S2Z4A1	Phosphofructokinase muscle isoform 3 (Fragment) OS=Homo sapiens GN=PFKM PE=2 SV=1 - [A0A0S2Z4A1_HUMAN]	39.71	8.83	19	2	4	13	725	79.2	8.05
E9PN48	ADP-ribosylation factor GTPase-activating protein 2 (Fragment) OS=Homo sapiens GN=ARFGAP2 PE=1 SV=1 - [E9PN48_HUMAN]	39.41	12.30	12	1	2	17	252	27.1	9.19
Q6ICK5	Em:AC008101.5 protein OS=Homo sapiens GN=Em:AC008101.5 PE=2 SV=1 - [Q6ICK5_HUMAN]	39.24	8.49	1	2	2	15	212	22.7	10.99
B4DM03	cDNA FLJ50574, highly similar to ATP-dependent RNA helicase DDX24 (EC 3.6.1.-) OS=Homo sapiens PE=2 SV=1 - [B4DM03_HUMAN]	38.88	4.85	11	2	3	17	763	85.5	8.43
Q6KB66	Keratin, type II cytoskeletal 80 OS=Homo sapiens GN=KRT80 PE=1 SV=2 - [K2C80_HUMAN]	38.74	11.73	2	3	5	12	452	50.5	5.67
L8B4Z6	Ubiquitin C OS=Homo sapiens GN=UbC PE=4 SV=1 - [L8B4Z6_HUMAN]	38.74	51.68	38	4	4	13	685	77.0	7.66
P06733	Alpha-enolase OS=Homo sapiens GN=ENO1 PE=1 SV=2 - [ENOA_HUMAN]	38.70789552	28.11	13	6	8	13	434	47.13932161	7.386230469
F8VQ14	T-complex protein 1 subunit beta OS=Homo sapiens GN=CCT2 PE=1 SV=1 - [F8VQ14_HUMAN]	38.09	17.31	5	6	6	11	416	44.8	6.54
A0A0U1RRH1	Ryanodine receptor 3 OS=Homo sapiens GN=RYR3 PE=1 SV=1 - [A0A0U1RRH1_HUMAN]	37.99	2.02	10	2	8	16	4859	550.5	5.69
P38919	Eukaryotic initiation factor 4A-III OS=Homo sapiens GN=EIF4A3 PE=1 SV=4 - [IF4A3_HUMAN]	37.95	14.60	12	4	5	11	411	46.8	6.73
B4DUQ1	cDNA FLJ54552, highly similar to Heterogeneous nuclear ribonucleoprotein K OS=Homo sapiens PE=2 SV=1 - [B4DUQ1_HUMAN]	37.34	20.50	10	7	7	12	439	48.5	5.92
B3KVX6	cDNA FLJ41699 fis, clone HCHON2004776, highly similar to Homo sapiens cytoskeleton-associated protein 4 (CKAP4), mRNA OS=Homo sapiens PE=2 SV=1 - [B3KVX6_HUMAN]	37.24	17.08	4	7	7	11	521	58.1	5.25
D6RD46	LIM and calponin homology domains-containing protein 1 OS=Homo sapiens GN=LIMCH1 PE=1 SV=1 - [D6RD46_HUMAN]	36.38	12.35	12	1	9	13	980	109.9	6.47
Q8IVT2	Mitotic interactor and substrate of PLK1 OS=Homo sapiens GN=MISP PE=1 SV=1 - [MISP_HUMAN]	36.33	13.11	1	7	7	12	679	75.3	6.83
Q4VXL4	HCG41426, isoform CRA_c OS=Homo sapiens GN=TACC2 PE=1 SV=1 - [Q4VXL4_HUMAN]	35.79	13.57	23	6	6	13	575	64.6	5.34
F8WE98	Filamin-A (Fragment) OS=Homo sapiens GN=FLNA PE=1 SV=2 - [F8WE98_HUMAN]	35.50	16.89	1	1	8	11	604	66.6	8.95
A0A1B0GTN4	Disks large-associated protein 2 OS=Homo sapiens GN=DLGAP2 PE=1 SV=1 - [A0A1B0GTN4_HUMAN]	34.61	4.36	8	2	3	15	1055	117.7	6.98
P26641	Elongation factor 1-gamma OS=Homo sapiens GN=EEF1G PE=1 SV=3 - [EF1G_HUMAN]	34.46	8.47	5	4	4	10	437	50.1	6.67
A0A024QZJ6	Myosin, heavy polypeptide 11, smooth muscle, isoform CRA_b OS=Homo sapiens GN=MYH11 PE=3 SV=1 - [A0A024QZJ6_HUMAN]	34.42	3.15	10	1	5	13	1938	223.4	5.53
P17987	T-complex protein 1 subunit alpha OS=Homo sapiens GN=TCP1 PE=1 SV=1 - [TCPA_HUMAN]	34.24	8.99	9	5	5	10	556	60.3	6.11
Q9BXT4	Tudor domain-containing protein 1 OS=Homo sapiens GN=TDRD1 PE=1 SV=2 - [TDRD1_HUMAN]	34.24	3.22	4	2	3	15	1180	131.9	6.34
G5EA03	LIM and calponin homology domains-containing protein 1 OS=Homo sapiens GN=LIMCH1 PE=1 SV=1 - [G5EA03_HUMAN]	33.90	7.77	11	1	9	12	1467	164.3	6.35
Q8IWY7	Tau-tubulin kinase OS=Homo sapiens GN=TTBK2 PE=1 SV=1 - [Q8IWY7_HUMAN]	33.56	3.94	2	2	5	13	1649	182.4	7.02
Q8N1N4	Keratin, type II cytoskeletal 78 OS=Homo sapiens GN=KRT78 PE=2 SV=2 - [K2C78_HUMAN]	33.13	9.04	3	3	5	10	520	56.8	6.02
Q6ZW00	cDNA FLJ41858 fis, clone NT2RI3006796 OS=Homo sapiens PE=2 SV=1 - [Q6ZW00_HUMAN]	32.12	16.67	1	1	1	14	126	13.0	10.04
Q9BRJ0	HECTD1 protein (Fragment) OS=Homo sapiens GN=HECTD1 PE=2 SV=2 - [Q9BRJ0_HUMAN]	32.05	11.57	7	1	1	14	121	13.4	8.28
Q2M2I5	Keratin, type I cytoskeletal 24 OS=Homo sapiens GN=KRT24 PE=1 SV=1 - [K1C24_HUMAN]	31.77	5.52	7	2	3	13	525	55.1	4.96
Q8WXI7	Mucin-16 OS=Homo sapiens GN=MUC16 PE=1 SV=3 - [MUC16_HUMAN]	30.93	1.21	7	9	11	13	14507	1518.2	5.26
Q9NYQ8	Protocadherin Fat 2 OS=Homo sapiens GN=FAT2 PE=1 SV=2 - [FAT2_HUMAN]	30.32	0.37	1	1	1	13	4349	479.0	5.16
C9JVA8	Serpin B8 (Fragment) OS=Homo sapiens GN=SERPINB8 PE=1 SV=1 - [C9JVA8_HUMAN]	29.79	9.15	5	1	1	12	164	18.3	4.75
Q15323	Keratin, type I cuticular Ha1 OS=Homo sapiens GN=KRT31 PE=1 SV=3 - [K1H1_HUMAN]	29.77	4.33	10	1	2	12	416	47.2	4.88
C4AM86	Keratin, type I cuticular Ha5 OS=Homo sapiens GN=KRT35 PE=1 SV=1 - [C4AM86_HUMAN]	29.49	4.94	9	1	2	12	425	47.6	4.77
O00148	ATP-dependent RNA helicase DDX39A OS=Homo sapiens GN=DDX39A PE=1 SV=2 - [DX39A_HUMAN]	29.43	16.39	43	7	7	10	427	49.1	5.68
Q6KB66	Keratin, type II cytoskeletal 80 OS=Homo sapiens GN=KRT80 PE=1 SV=2 - [K2C80_HUMAN]	29.17	5.53	11	1	2	8	452	50.5	5.67
C9J674	Radical S-adenosyl methionine domain-containing protein 2 (Fragment) OS=Homo sapiens GN=RSAD2 PE=1 SV=1 - [C9J674_HUMAN]	28.93	9.93	1	1	1	13	141	15.9	9.91
H0Y2W2	ATPase family AAA domain-containing protein 3A (Fragment) OS=Homo sapiens GN=ATAD3A PE=1 SV=1 - [H0Y2W2_HUMAN]	28.92	10.14	7	4	4	9	572	64.3	9.44
Q96HI1	Similar to plastin 3 (T isoform) (Fragment) OS=Homo sapiens PE=2 SV=1 - [Q96HI1_HUMAN]	28.19	12.71	11	5	5	9	409	46.0	6.67
M0R1V7	Ubiquitin-60S ribosomal protein L40 (Fragment) OS=Homo sapiens GN=UBA52 PE=1 SV=1 - [M0R1V7_HUMAN]	28.18	39.68	38	2	2	9	63	7.1	5.36
A0A087WWT3	Serum albumin OS=Homo sapiens GN=ALB PE=1 SV=1 - [A0A087WWT3_HUMAN]	28.05	3.79	13	2	2	9	396	45.1	6.10
B4DPZ5	cDNA FLJ53495, highly similar to Polymerase I and transcript release factor OS=Homo sapiens PE=2 SV=1 - [B4DPZ5_HUMAN]	27.41	23.42	4	7	7	10	363	40.5	5.25
Q13707	ACTA2 protein (Fragment) OS=Homo sapiens GN=ACTA2 PE=3 SV=1 - [Q13707_HUMAN]	27.15	16.06	32	1	4	10	330	36.8	5.35
Q14254	Flotillin-2 OS=Homo sapiens GN=FLOT2 PE=1 SV=2 - [FLOT2_HUMAN]	27.09	18.93	5	1	8	9	428	47.0	5.25
Q15058	Kinesin-like protein KIF14 OS=Homo sapiens GN=KIF14 PE=1 SV=1 - [KIF14_HUMAN]	26.99	7.28	1	8	8	11	1648	186.4	7.91
B4DJU9	cDNA FLJ55278, highly similar to AF4/FMR2 family member 1 OS=Homo sapiens PE=2 SV=1 - [B4DJU9_HUMAN]	26.80	4.00	4	1	3	12	849	91.6	9.42
P31689	DnaJ homolog subfamily A member 1 OS=Homo sapiens GN=DNAJA1 PE=1 SV=2 - [DNJA1_HUMAN]	26.27	9.82	3	3	3	8	397	44.8	7.08
B4DXW1	Actin-related protein 3 OS=Homo sapiens GN=ACTR3 PE=1 SV=1 - [B4DXW1_HUMAN]	26.09	9.81	7	3	3	8	367	42.0	5.62
Q08211	ATP-dependent RNA helicase A OS=Homo sapiens GN=DHX9 PE=1 SV=4 - [DHX9_HUMAN]	25.70	2.20	1	1	2	11	1270	140.9	6.84
A7MD96	SYNPO protein (Fragment) OS=Homo sapiens GN=SYNPO PE=2 SV=1 - [A7MD96_HUMAN]	25.63	7.78	3	5	5	9	887	94.7	9.74
Q9BTI6	FLOT2 protein OS=Homo sapiens GN=FLOT2 PE=2 SV=1 - [Q9BTI6_HUMAN]	25.58	21.56	2	1	8	9	385	42.5	5.27
Q9NU22	Midasin OS=Homo sapiens GN=MDN1 PE=1 SV=2 - [MDN1_HUMAN]	25.42	1.29	3	2	6	11	5596	632.4	5.68
S4R3E6	Izumo sperm-egg fusion protein 3 OS=Homo sapiens GN=IZUMO3 PE=4 SV=1 - [S4R3E6_HUMAN]	25.41	6.01	2	1	1	11	233	27.1	8.69
E9PEM5	Lipopolysaccharide-responsive and beige-like anchor protein OS=Homo sapiens GN=LRBA PE=1 SV=1 - [E9PEM5_HUMAN]	25.16	2.10	7	3	4	11	2575	286.8	5.52
Q02413	Desmoglein-1 OS=Homo sapiens GN=DSG1 PE=1 SV=2 - [DSG1_HUMAN]	25.11	8.96	1	6	6	9	1049	113.7	5.03
Q96M86	Dynein heavy chain domain-containing protein 1 OS=Homo sapiens GN=DNHD1 PE=2 SV=2 - [DNHD1_HUMAN]	24.97	0.80	4	3	3	10	4753	533.3	6.71
A0A024R914	Centrosomal protein 350kDa, isoform CRA_a OS=Homo sapiens GN=CEP350 PE=4 SV=1 - [A0A024R914_HUMAN]	24.97	4.46	7	9	9	11	3117	350.7	6.34
A0A075B730	Epiplakin OS=Homo sapiens GN=EPPK1 PE=1 SV=2 - [A0A075B730_HUMAN]	24.95	4.07	3	5	7	10	5063	552.8	5.60
A0A087WVM4	Monofunctional C1-tetrahydrofolate synthase, mitochondrial OS=Homo sapiens GN=MTHFD1L PE=1 SV=1 - [A0A087WVM4_HUMAN]	24.91	6.13	5	4	5	11	913	99.2	7.27
O60673	DNA polymerase zeta catalytic subunit OS=Homo sapiens GN=REV3L PE=1 SV=2 - [REV3L_HUMAN]	24.86	3.07	4	3	6	11	3130	352.6	8.47
Q20BG7	CTTNBP2 (Fragment) OS=Homo sapiens GN=CTTNBP2 PE=4 SV=1 - [Q20BG7_HUMAN]	24.77	5.40	8	5	7	11	1482	160.8	7.71
O95456	Proteasome assembly chaperone 1 OS=Homo sapiens GN=PSMG1 PE=1 SV=1 - [PSMG1_HUMAN]	24.67	11.46	3	2	2	11	288	32.8	7.17
P35247	Pulmonary surfactant-associated protein D OS=Homo sapiens GN=SFTPD PE=1 SV=3 - [SFTPD_HUMAN]	24.62	17.60	3	3	3	10	375	37.7	6.60
Q5UIP0	Telomere-associated protein RIF1 OS=Homo sapiens GN=RIF1 PE=1 SV=2 - [RIF1_HUMAN]	24.13	5.22	5	7	9	10	2472	274.3	5.52
B7Z3E5	cDNA FLJ53573, highly similar to Myosin Ic OS=Homo sapiens PE=2 SV=1 - [B7Z3E5_HUMAN]	23.60	6.74	11	6	6	8	1039	119.0	9.41
H7BY35	Ryanodine receptor 2 OS=Homo sapiens GN=RYR2 PE=1 SV=2 - [H7BY35_HUMAN]	23.60	1.78	8	3	7	11	4950	562.2	6.19
P49454	Centromere protein F OS=Homo sapiens GN=CENPF PE=1 SV=2 - [CENPF_HUMAN]	23.29	3.96	1	8	10	10	3210	367.5	5.07
A0A024R1X8	Junction plakoglobin, isoform CRA_a OS=Homo sapiens GN=JUP PE=4 SV=1 - [A0A024R1X8_HUMAN]	23.25	10.47	10	6	6	8	745	81.7	6.14
Q9ULG1	DNA helicase INO80 OS=Homo sapiens GN=INO80 PE=1 SV=2 - [INO80_HUMAN]	22.99	3.66	6	3	4	10	1556	176.6	9.50
Q02388	Collagen alpha-1(VII) chain OS=Homo sapiens GN=COL7A1 PE=1 SV=2 - [CO7A1_HUMAN]	22.89	4.28	2	7	8	10	2944	295.0	6.27
B2R6Q2	Alkaline phosphatase OS=Homo sapiens PE=2 SV=1 - [B2R6Q2_HUMAN]	22.85	14.89	5	6	6	7	524	57.2	6.57
B3KUK6	cDNA FLJ40103 fis, clone TESTI2006040, highly similar to Cytosolic 5'-nucleotidase 1B (EC 3.1.3.5) OS=Homo sapiens PE=2 SV=1 - [B3KUK6_HUMAN]	22.82	4.91	7	1	2	9	550	61.9	8.79
B4DQY2	MICOS complex subunit MIC60 OS=Homo sapiens PE=2 SV=1 - [B4DQY2_HUMAN]	22.72	11.95	13	4	6	9	711	78.9	7.06
J3KTA4	Probable ATP-dependent RNA helicase DDX5 OS=Homo sapiens GN=DDX5 PE=1 SV=1 - [J3KTA4_HUMAN]	22.71	11.07	13	4	5	8	614	69.0	8.85
Q9NSB2	Keratin, type II cuticular Hb4 OS=Homo sapiens GN=KRT84 PE=2 SV=2 - [KRT84_HUMAN]	22.71	5.33	1	1	3	9	600	64.8	7.56
A0A0A0MS79	Nck-associated protein 5 OS=Homo sapiens GN=NCKAP5 PE=1 SV=1 - [A0A0A0MS79_HUMAN]	22.65	1.31	3	2	2	9	1909	208.3	8.06
A9UF07	BCR/ABL fusion protein isoform Y5 OS=Homo sapiens GN=BCR/ABL fusion PE=2 SV=1 - [A9UF07_HUMAN]	22.58	4.36	31	6	6	10	1790	196.5	8.40
Q86YZ3	Hornerin OS=Homo sapiens GN=HRNR PE=1 SV=2 - [HORN_HUMAN]	22.57	10.42	1	6	6	8	2850	282.2	10.04
B7Z2Z8	T-complex protein 1 subunit delta OS=Homo sapiens PE=2 SV=1 - [B7Z2Z8_HUMAN]	22.51	13.04	5	4	4	7	483	52.3	6.57
B5BUB1	RuvB-like helicase (Fragment) OS=Homo sapiens GN=RUVBL1 PE=2 SV=1 - [B5BUB1_HUMAN]	22.49	12.72	6	5	5	8	456	50.2	6.42
A5A3E0	POTE ankyrin domain family member F OS=Homo sapiens GN=POTEF PE=1 SV=2 - [POTEF_HUMAN]	22.24	6.98	40	1	6	8	1075	121.4	6.20
H3BPE1	Microtubule-actin cross-linking factor 1, isoforms 1/2/3/5 OS=Homo sapiens GN=MACF1 PE=1 SV=1 - [H3BPE1_HUMAN]	22.10	1.06	9	5	6	9	7555	856.3	5.39
Q00610	Clathrin heavy chain 1 OS=Homo sapiens GN=CLTC PE=1 SV=5 - [CLH1_HUMAN]	22.04	7.22	7	8	8	9	1675	191.5	5.69
B4DHT1	cDNA FLJ52901, highly similar to Procollagen-lysine,2-oxoglutarate5-dioxygenase 1 (EC 1.14.11.4) OS=Homo sapiens PE=2 SV=1 - [B4DHT1_HUMAN]	21.85	14.07	1	1	5	9	391	45.3	7.40
A0A024R0N6	Spectrin beta chain OS=Homo sapiens GN=SPTBN4 PE=3 SV=1 - [A0A024R0N6_HUMAN]	21.73	5.93	7	8	9	10	2564	288.8	6.01
O95996	Adenomatous polyposis coli protein 2 OS=Homo sapiens GN=APC2 PE=1 SV=1 - [APCL_HUMAN]	21.65	6.51	6	9	10	10	2303	243.8	8.82
Q6WRI0	Immunoglobulin superfamily member 10 OS=Homo sapiens GN=IGSF10 PE=2 SV=1 - [IGS10_HUMAN]	21.54	2.52	1	2	4	9	2623	290.7	9.13
Q03164	Histone-lysine N-methyltransferase 2A OS=Homo sapiens GN=KMT2A PE=1 SV=5 - [KMT2A_HUMAN]	21.41	2.44	5	6	6	9	3969	431.5	9.09
B7Z3G0	cDNA FLJ58367, weakly similar to LIM domain only protein 7 OS=Homo sapiens PE=2 SV=1 - [B7Z3G0_HUMAN]	21.39	12.61	3	1	8	9	833	94.1	6.87
A5YM63	NEFM protein OS=Homo sapiens GN=NEFM PE=2 SV=1 - [A5YM63_HUMAN]	21.35	6.04	13	2	5	8	877	98.3	4.86
D3DTH7	Myosin IC, isoform CRA_a OS=Homo sapiens GN=MYO1C PE=3 SV=1 - [D3DTH7_HUMAN]	21.21	10.21	7	6	6	8	862	98.9	9.42
Q68CX7	Putative uncharacterized protein DKFZp686N09117 (Fragment) OS=Homo sapiens GN=DKFZp686N09117 PE=2 SV=1 - [Q68CX7_HUMAN]	21.18	17.33	2	1	1	10	75	8.5	7.33
Q9UBJ2	ATP-binding cassette sub-family D member 2 OS=Homo sapiens GN=ABCD2 PE=1 SV=1 - [ABCD2_HUMAN]	20.95	2.43	1	1	1	8	740	83.2	8.92
O15078	Centrosomal protein of 290 kDa OS=Homo sapiens GN=CEP290 PE=1 SV=2 - [CE290_HUMAN]	20.91	4.36	7	5	8	9	2479	290.2	5.95
O00365	p40 OS=Homo sapiens PE=4 SV=1 - [O00365_HUMAN]	20.78	7.40	1	1	2	9	338	39.9	9.38
A0A024R8E9	KIAA0649, isoform CRA_a OS=Homo sapiens GN=KIAA0649 PE=4 SV=1 - [A0A024R8E9_HUMAN]	20.74	6.95	2	5	5	9	1209	127.2	8.59
H7BZ55	Putative ciliary rootlet coiled-coil protein 2 OS=Homo sapiens GN=CROCC2 PE=5 SV=3 - [CRCC2_HUMAN]	20.71	3.99	1	3	5	9	1655	185.8	5.50
C9JVY5	A-kinase anchor protein 2 (Fragment) OS=Homo sapiens GN=AKAP2 PE=1 SV=1 - [C9JVY5_HUMAN]	20.70	6.43	5	3	3	8	778	85.2	4.96
A0A087X0V8	RUN domain-containing protein 3A OS=Homo sapiens GN=RUNDC3A PE=1 SV=1 - [A0A087X0V8_HUMAN]	20.69	5.69	2	1	2	7	404	45.5	5.31
Q6MZF6	Putative uncharacterized protein DKFZp686E13109 (Fragment) OS=Homo sapiens GN=DKFZp686E13109 PE=2 SV=1 - [Q6MZF6_HUMAN]	20.61	4.14	9	5	6	9	1956	219.8	7.80
E9PCY7	Heterogeneous nuclear ribonucleoprotein H OS=Homo sapiens GN=HNRNPH1 PE=1 SV=1 - [E9PCY7_HUMAN]	20.45	20.75	24	3	6	7	429	47.1	6.34
Q9UQ35	Serine/arginine repetitive matrix protein 2 OS=Homo sapiens GN=SRRM2 PE=1 SV=2 - [SRRM2_HUMAN]	20.40	4.72	9	5	8	10	2752	299.4	12.06
Q86SW4	Dihydrolipoamide acetyltransferase component of pyruvate dehydrogenase complex (Fragment) OS=Homo sapiens GN=DLST PE=1 SV=1 - [Q86SW4_HUMAN]	20.34	16.85	10	1	4	6	279	29.6	8.32
A0A087X0B9	Phosphatidylinositol phosphatase PTPRQ OS=Homo sapiens GN=PTPRQ PE=4 SV=1 - [A0A087X0B9_HUMAN]	20.27	5.53	7	8	8	8	2332	260.7	5.78
P78386	Keratin, type II cuticular Hb5 OS=Homo sapiens GN=KRT85 PE=1 SV=1 - [KRT85_HUMAN]	20.15	13.61	11	2	5	8	507	55.8	6.55
J3KSW8	Myosin phosphatase Rho-interacting protein (Fragment) OS=Homo sapiens GN=MPRIP PE=1 SV=1 - [J3KSW8_HUMAN]	20.12	9.36	15	6	6	9	844	95.9	6.04
Q17RW2	Collagen alpha-1(XXIV) chain OS=Homo sapiens GN=COL24A1 PE=1 SV=2 - [COOA1_HUMAN]	20.01	4.55	2	4	5	9	1714	175.4	8.27
A8K5J7	cDNA FLJ77290, highly similar to Homo sapiens BCL2-associated athanogene 5 (BAG5), mRNA OS=Homo sapiens PE=2 SV=1 - [A8K5J7_HUMAN]	19.84	24.38	3	7	7	7	447	51.2	5.99
F8VS07	LIM domain and actin-binding protein 1 OS=Homo sapiens GN=LIMA1 PE=1 SV=1 - [F8VS07_HUMAN]	19.59	14.91	7	5	5	7	456	51.1	5.49
A0A0C4DGG1	Protein kinase C and casein kinase substrate in neurons protein 3 (Fragment) OS=Homo sapiens GN=PACSIN3 PE=1 SV=1 - [A0A0C4DGG1_HUMAN]	19.54	13.83	10	4	4	6	405	46.5	6.18
Q5VY60	HAUS augmin-like complex subunit 6 OS=Homo sapiens GN=HAUS6 PE=1 SV=1 - [Q5VY60_HUMAN]	19.39	2.99	3	1	2	9	802	91.1	6.43
H3BPF8	Golgin A8 family member S OS=Homo sapiens GN=GOLGA8S PE=4 SV=1 - [H3BPF8_HUMAN]	19.39	7.36	10	3	4	9	625	70.4	7.78
B4DYC8	cDNA FLJ52361, highly similar to T-complex protein 1 subunit epsilon OS=Homo sapiens PE=2 SV=1 - [B4DYC8_HUMAN]	19.38	9.67	14	3	4	7	486	53.9	6.55
P11388	DNA topoisomerase 2-alpha OS=Homo sapiens GN=TOP2A PE=1 SV=3 - [TOP2A_HUMAN]	19.31	3.59	1	4	4	8	1531	174.3	8.72
O15231	Zinc finger protein 185 OS=Homo sapiens GN=ZNF185 PE=1 SV=3 - [ZN185_HUMAN]	19.29	16.11	7	6	6	7	689	73.5	7.01
B4DKS8	cDNA FLJ57121, highly similar to Heterogeneous nuclear ribonucleoprotein F OS=Homo sapiens PE=2 SV=1 - [B4DKS8_HUMAN]	19.25	23.37	4	3	5	7	338	37.2	6.05
O95831	Apoptosis-inducing factor 1, mitochondrial OS=Homo sapiens GN=AIFM1 PE=1 SV=1 - [AIFM1_HUMAN]	19.10	10.93	5	4	4	6	613	66.9	8.95
D3DPF9	Titin, isoform CRA_b OS=Homo sapiens GN=TTN PE=4 SV=1 - [D3DPF9_HUMAN]	19.04	0.43	6	5	8	8	26926	2991.2	6.74
B9EG70	Nuclear protein, ataxia-telangiectasia locus OS=Homo sapiens GN=NPAT PE=2 SV=1 - [B9EG70_HUMAN]	18.98	1.61	3	1	2	8	1427	154.2	5.94
A0A087WTT1	Polyadenylate-binding protein OS=Homo sapiens GN=PABPC1 PE=1 SV=1 - [A0A087WTT1_HUMAN]	18.93	11.88	26	4	4	6	522	58.5	9.26
Q5CZC0	Fibrous sheath-interacting protein 2 OS=Homo sapiens GN=FSIP2 PE=2 SV=4 - [FSIP2_HUMAN]	18.85	1.97	5	7	8	8	6907	780.1	6.71
O60701	UDP-glucose 6-dehydrogenase OS=Homo sapiens GN=UGDH PE=1 SV=1 - [UGDH_HUMAN]	18.83	12.75	6	6	6	7	494	55.0	7.12
Q8N1N4	Keratin, type II cytoskeletal 78 OS=Homo sapiens GN=KRT78 PE=2 SV=2 - [K2C78_HUMAN]	18.72	7.31	2	2	3	6	520	56.8	6.02
P02461	Collagen alpha-1(III) chain OS=Homo sapiens GN=COL3A1 PE=1 SV=4 - [CO3A1_HUMAN]	18.69	8.32	1	7	8	8	1466	138.5	6.61
M0R0M7	Syntaxin-binding protein 2 OS=Homo sapiens GN=STXBP2 PE=1 SV=1 - [M0R0M7_HUMAN]	18.66	10.29	1	1	3	8	408	45.8	6.04
D6REC4	Cilia- and flagella-associated protein 99 OS=Homo sapiens GN=CFAP99 PE=3 SV=1 - [CFA99_HUMAN]	18.60	6.32	3	1	2	8	459	52.3	10.55
B4E2R2	cDNA FLJ54241, highly similar to Cytochrome P450 4F12 (EC 1.14.14.1) OS=Homo sapiens PE=2 SV=1 - [B4E2R2_HUMAN]	18.50	6.98	1	1	1	8	172	19.5	9.73
Q9UPN3	Microtubule-actin cross-linking factor 1, isoforms 1/2/3/5 OS=Homo sapiens GN=MACF1 PE=1 SV=4 - [MACF1_HUMAN]	18.49	1.10	8	3	6	8	7388	837.8	5.39
B4DY27	cDNA FLJ57011, highly similar to Homo sapiens cancer susceptibility candidate 1 (CASC1), mRNA OS=Homo sapiens PE=2 SV=1 - [B4DY27_HUMAN]	18.45	6.37	7	1	2	8	455	53.0	4.89
A0A0J9YY01	Unconventional myosin-XVB OS=Homo sapiens GN=MYO15B PE=1 SV=1 - [A0A0J9YY01_HUMAN]	18.43	3.98	5	5	8	8	3064	333.5	7.72
P78527	DNA-dependent protein kinase catalytic subunit OS=Homo sapiens GN=PRKDC PE=1 SV=3 - [PRKDC_HUMAN]	18.42	2.79	3	6	8	8	4128	468.8	7.12
Q8NFW1	Collagen alpha-1(XXII) chain OS=Homo sapiens GN=COL22A1 PE=2 SV=2 - [COMA1_HUMAN]	18.41	8.86	1	7	8	8	1626	161.0	7.23
Q53HV2	Chaperonin containing TCP1, subunit 7 (Eta) variant (Fragment) OS=Homo sapiens PE=2 SV=1 - [Q53HV2_HUMAN]	18.39	17.86	6	7	7	7	543	59.3	7.65
O76024	Wolframin OS=Homo sapiens GN=WFS1 PE=1 SV=2 - [WFS1_HUMAN]	18.31	2.92	1	1	2	8	890	100.2	8.05
Q86Y22	Collagen alpha-1(XXIII) chain OS=Homo sapiens GN=COL23A1 PE=1 SV=1 - [CONA1_HUMAN]	18.28	13.15	1	2	4	8	540	51.9	7.25
Q59EE7	Pro-alpha-1 type V collagen variant (Fragment) OS=Homo sapiens PE=2 SV=1 - [Q59EE7_HUMAN]	18.20	7.87	5	8	8	8	1792	178.4	5.00
A4D2F6	Similar to Splicing factor, arginine/serine-rich, 46kD OS=Homo sapiens GN=LOC392896 PE=4 SV=1 - [A4D2F6_HUMAN]	18.20	8.56	1	2	3	8	549	60.6	11.17
Q96N05	HCG2018772 OS=Homo sapiens GN=hCG_2018772 PE=2 SV=1 - [Q96N05_HUMAN]	18.14	9.47	1	1	1	8	190	21.0	9.66
Q96MK2	Protein FAM65C OS=Homo sapiens GN=FAM65C PE=1 SV=4 - [FA65C_HUMAN]	18.13	5.92	4	3	4	8	946	105.2	7.43
M0QYG6	Uncharacterized protein (Fragment) OS=Homo sapiens PE=4 SV=1 - [M0QYG6_HUMAN]	18.11	28.47	1	2	3	8	137	14.6	11.55
D3DWL9	Cleavage and polyadenylation specific factor 1, 160kDa, isoform CRA_a OS=Homo sapiens GN=CPSF1 PE=4 SV=1 - [D3DWL9_HUMAN]	18.07	5.20	2	3	5	7	1365	151.9	6.33
B4DQ39	cDNA FLJ55743, highly similar to DNA replication licensing factor MCM5 OS=Homo sapiens PE=2 SV=1 - [B4DQ39_HUMAN]	17.88	8.55	10	4	4	6	643	71.5	9.31
Q96BY6	Dedicator of cytokinesis protein 10 OS=Homo sapiens GN=DOCK10 PE=1 SV=3 - [DOC10_HUMAN]	17.84	2.10	5	2	4	7	2186	249.4	7.14
O43896	Kinesin-like protein KIF1C OS=Homo sapiens GN=KIF1C PE=1 SV=3 - [KIF1C_HUMAN]	17.79	3.99	1	3	3	8	1103	122.9	6.90
O75339	Cartilage intermediate layer protein 1 OS=Homo sapiens GN=CILP PE=1 SV=4 - [CILP1_HUMAN]	17.79	4.56	1	2	3	8	1184	132.5	8.41
A0A0C4DG72	Collagen alpha-1(XXVIII) chain (Fragment) OS=Homo sapiens GN=COL28A1 PE=4 SV=1 - [A0A0C4DG72_HUMAN]	17.70	10.77	1	1	1	7	130	12.8	8.70
Q03001	Dystonin OS=Homo sapiens GN=DST PE=1 SV=4 - [DYST_HUMAN]	17.66	0.96	7	5	6	8	7570	860.1	5.25
Q8N3K9	Cardiomyopathy-associated protein 5 OS=Homo sapiens GN=CMYA5 PE=1 SV=3 - [CMYA5_HUMAN]	17.60	2.21	1	6	6	7	4069	448.9	4.78
Q5VT52	Regulation of nuclear pre-mRNA domain-containing protein 2 OS=Homo sapiens GN=RPRD2 PE=1 SV=1 - [RPRD2_HUMAN]	17.20	2.60	1	1	4	7	1461	155.9	7.42
Q9UDX5	Mitochondrial fission process protein 1 OS=Homo sapiens GN=MTFP1 PE=1 SV=1 - [MTFP1_HUMAN]	17.14	8.43	2	1	1	7	166	18.0	9.31
Q96GW1	Endoplasmin OS=Homo sapiens GN=HSP90B1 PE=1 SV=1 - [Q96GW1_HUMAN]	17.10	7.94	6	1	2	6	315	35.4	4.70
Q7RTP6	[F-actin]-methionine sulfoxide oxidase MICAL3 OS=Homo sapiens GN=MICAL3 PE=1 SV=2 - [MICA3_HUMAN]	17.09	3.35	5	4	5	7	2002	224.2	5.55
B4DK38	cDNA FLJ60613, highly similar to Mus musculus FCH and double SH3 domains 2 (Fchsd2), mRNA OS=Homo sapiens PE=2 SV=1 - [B4DK38_HUMAN]	17.08	3.81	6	1	2	6	604	67.8	5.17
B4DMJ6	cDNA FLJ50996, highly similar to 60S ribosomal protein L4 OS=Homo sapiens PE=2 SV=1 - [B4DMJ6_HUMAN]	17.07	8.21	10	3	3	6	414	46.0	11.36
Q5T1H1	Protein eyes shut homolog OS=Homo sapiens GN=EYS PE=1 SV=5 - [EYS_HUMAN]	17.02	0.76	2	2	2	8	3165	350.6	5.78
Q1MSJ5	Centrosome and spindle pole-associated protein 1 OS=Homo sapiens GN=CSPP1 PE=1 SV=4 - [CSPP1_HUMAN]	16.97	3.34	1	3	4	7	1256	145.4	6.80
H7BZQ4	Cytosolic 5'-nucleotidase 1B (Fragment) OS=Homo sapiens GN=NT5C1B PE=4 SV=1 - [H7BZQ4_HUMAN]	16.97	4.15	6	1	1	6	265	29.7	7.15
A0A1B0GVY7	Golgin subfamily A member 8J OS=Homo sapiens GN=GOLGA8J PE=4 SV=1 - [A0A1B0GVY7_HUMAN]	16.94	6.37	5	1	3	8	597	67.4	7.96
A0JP02	PLEKHA5 protein OS=Homo sapiens GN=PLEKHA5 PE=1 SV=1 - [A0JP02_HUMAN]	16.81	5.15	7	2	3	7	874	99.6	6.73
D3DSZ2	Zinc finger protein 608, isoform CRA_b OS=Homo sapiens GN=ZNF608 PE=4 SV=1 - [D3DSZ2_HUMAN]	16.81	2.10	4	1	2	8	1381	147.5	8.75
P63151	Serine/threonine-protein phosphatase 2A 55 kDa regulatory subunit B alpha isoform OS=Homo sapiens GN=PPP2R2A PE=1 SV=1 - [2ABA_HUMAN]	16.71	15.66	4	5	5	6	447	51.7	6.20
A0A0A0MRF6	A-kinase anchor protein 9 OS=Homo sapiens GN=AKAP9 PE=1 SV=1 - [A0A0A0MRF6_HUMAN]	16.65	2.15	9	2	6	7	3910	453.2	4.98
Q96DP6	cDNA FLJ31052 fis, clone HSYRA2000629, weakly similar to SKIN SECRETORY PROTEIN XP2 OS=Homo sapiens PE=2 SV=1 - [Q96DP6_HUMAN]	16.62	11.22	1	3	3	7	312	32.5	11.68
B2RAH5	Protein phosphatase 1 regulatory subunit OS=Homo sapiens PE=2 SV=1 - [B2RAH5_HUMAN]	16.58	6.21	12	6	6	7	1030	115.3	5.43
B0BCZ6	Glutamyl aminopeptidase (Aminopeptidase A) OS=Homo sapiens GN=ENPEP PE=2 SV=1 - [B0BCZ6_HUMAN]	16.48	3.55	13	3	3	7	957	109.2	5.43
I3L1Y9	FLYWCH family member 2 OS=Homo sapiens GN=FLYWCH2 PE=1 SV=1 - [I3L1Y9_HUMAN]	16.48	20.83	3	2	2	8	144	15.6	10.21
E1A689	Mutant Apo B 100 OS=Homo sapiens PE=2 SV=1 - [E1A689_HUMAN]	16.45	2.26	7	6	7	7	4344	489.5	7.15
Q8WXH0	Nesprin-2 OS=Homo sapiens GN=SYNE2 PE=1 SV=3 - [SYNE2_HUMAN]	16.44	1.26	8	5	7	7	6885	795.9	5.36
Q7Z7G8	Vacuolar protein sorting-associated protein 13B OS=Homo sapiens GN=VPS13B PE=1 SV=2 - [VP13B_HUMAN]	16.42	2.09	2	6	6	7	4022	448.4	6.46
Q13733	Sodium/potassium-transporting ATPase subunit alpha-4 OS=Homo sapiens GN=ATP1A4 PE=1 SV=3 - [AT1A4_HUMAN]	16.41	8.84	7	1	5	7	1029	114.1	6.64
O95977	Sphingosine 1-phosphate receptor 4 OS=Homo sapiens GN=S1PR4 PE=1 SV=1 - [S1PR4_HUMAN]	16.38	7.29	2	3	3	7	384	41.6	9.96
O60884	DnaJ homolog subfamily A member 2 OS=Homo sapiens GN=DNAJA2 PE=1 SV=1 - [DNJA2_HUMAN]	16.36	9.22	5	3	3	5	412	45.7	6.48
A0A0D9SFB3	ATP-dependent RNA helicase DDX3X OS=Homo sapiens GN=DDX3X PE=1 SV=1 - [A0A0D9SFB3_HUMAN]	16.35	11.09	16	6	6	6	640	70.8	7.36
O75683	Surfeit locus protein 6 OS=Homo sapiens GN=SURF6 PE=1 SV=3 - [SURF6_HUMAN]	16.33	4.16	1	1	1	6	361	41.4	10.64
B4DZ22	cDNA FLJ54042, highly similar to ATP-binding cassette sub-family D member 3 OS=Homo sapiens PE=2 SV=1 - [B4DZ22_HUMAN]	16.33	11.77	3	5	5	6	586	67.3	8.95
A0A024RDF7	Uncharacterized protein OS=Homo sapiens GN=FLJ20032 PE=4 SV=1 - [A0A024RDF7_HUMAN]	16.33	4.64	4	4	5	7	1165	130.2	7.80
Q86YZ3	Hornerin OS=Homo sapiens GN=HRNR PE=1 SV=2 - [HORN_HUMAN]	16.33	8.49	1	6	6	6	2850	282.2	10.04
B4DFW2	Metalloproteinase inhibitor 2 OS=Homo sapiens GN=TIMP2 PE=1 SV=1 - [B4DFW2_HUMAN]	16.29	11.19	3	2	2	7	143	16.1	6.30
Q9P1Y5	Calmodulin-regulated spectrin-associated protein 3 OS=Homo sapiens GN=CAMSAP3 PE=1 SV=2 - [CAMP3_HUMAN]	16.27	2.16	2	2	2	6	1249	134.7	8.35
Q6MZL5	Putative uncharacterized protein DKFZp686C06243 (Fragment) OS=Homo sapiens GN=DKFZp686C06243 PE=2 SV=1 - [Q6MZL5_HUMAN]	16.26	2.72	4	4	4	7	1694	195.5	5.22
Q59G85	ZFYVE19 protein variant (Fragment) OS=Homo sapiens PE=2 SV=1 - [Q59G85_HUMAN]	16.26	14.46	1	1	1	6	166	17.9	4.60
B3KWT2	cDNA FLJ43774 fis, clone TESTI2050137, highly similar to Homo sapiens rai-like protein (RaLP), mRNA OS=Homo sapiens PE=2 SV=1 - [B3KWT2_HUMAN]	16.26	3.29	2	1	2	7	425	46.8	7.50
B4DET7	cDNA FLJ51803, highly similar to Ryanodine receptor 1 OS=Homo sapiens PE=2 SV=1 - [B4DET7_HUMAN]	16.25	3.41	6	1	2	6	675	76.6	5.68
A0A024R5M3	Cortactin, isoform CRA_c OS=Homo sapiens GN=CTTN PE=4 SV=1 - [A0A024R5M3_HUMAN]	16.20	14.42	9	5	5	6	513	57.4	5.33
H0YCW2	Zinc finger SWIM domain-containing protein 8 (Fragment) OS=Homo sapiens GN=ZSWIM8 PE=1 SV=1 - [H0YCW2_HUMAN]	16.13	4.09	6	1	2	7	904	96.0	7.08
Q14517	Protocadherin Fat 1 OS=Homo sapiens GN=FAT1 PE=1 SV=2 - [FAT1_HUMAN]	16.10	1.90	3	5	6	7	4588	506.0	5.00
Q3MI84	RAD52 protein (Fragment) OS=Homo sapiens GN=RAD52 PE=2 SV=1 - [Q3MI84_HUMAN]	16.08	12.78	10	1	3	7	399	43.7	7.71
A6NML8	Diaphanous homolog 2 (Drosophila), isoform CRA_c OS=Homo sapiens GN=DIAPH2 PE=1 SV=3 - [A6NML8_HUMAN]	16.08	2.37	7	1	2	6	1096	124.8	6.43
Q6UB99	Ankyrin repeat domain-containing protein 11 OS=Homo sapiens GN=ANKRD11 PE=1 SV=3 - [ANR11_HUMAN]	16.07	3.00	9	4	6	7	2663	297.7	7.11
B4E2Z3	cDNA FLJ54090, highly similar to 4F2 cell-surface antigen heavy chain OS=Homo sapiens PE=2 SV=1 - [B4E2Z3_HUMAN]	16.05	10.76	8	4	4	6	511	55.9	5.17
Q96JG9	Zinc finger protein 469 OS=Homo sapiens GN=ZNF469 PE=2 SV=3 - [ZN469_HUMAN]	16.03	2.62	2	5	6	7	3925	409.9	7.72
Q5JPF3	Ankyrin repeat domain-containing protein 36C OS=Homo sapiens GN=ANKRD36C PE=1 SV=3 - [AN36C_HUMAN]	16.01	6.52	5	3	6	7	1778	199.6	7.83
O00443	Phosphatidylinositol 4-phosphate 3-kinase C2 domain-containing subunit alpha OS=Homo sapiens GN=PIK3C2A PE=1 SV=2 - [P3C2A_HUMAN]	15.99	5.69	5	5	7	7	1686	190.6	8.02
B7Z6J1	cDNA FLJ55035, highly similar to Dihydrolipoyllysine-residue succinyltransferase component of 2- oxoglutarate dehydrogenase complex, mitochondrial (EC 2.3.1.61) OS=Homo sapiens PE=2 SV=1 - [B7Z6J1_HUMAN]	15.99	21.69	4	1	3	5	166	17.9	8.06
B2RAH5	Protein phosphatase 1 regulatory subunit OS=Homo sapiens PE=2 SV=1 - [B2RAH5_HUMAN]	15.98	5.24	9	4	4	6	1030	115.3	5.43
A7E2D8	Calcium-transporting ATPase OS=Homo sapiens GN=ATP2B4 PE=2 SV=1 - [A7E2D8_HUMAN]	15.92	6.19	12	4	5	7	1164	128.7	7.39
Q2M329	Coiled-coil domain-containing protein 96 OS=Homo sapiens GN=CCDC96 PE=2 SV=2 - [CCD96_HUMAN]	15.88	5.95	1	1	3	7	555	62.7	4.94
Q9BV73	Centrosome-associated protein CEP250 OS=Homo sapiens GN=CEP250 PE=1 SV=2 - [CP250_HUMAN]	15.86	2.46	2	3	5	7	2442	281.0	5.02
Q5VST9	Obscurin OS=Homo sapiens GN=OBSCN PE=1 SV=3 - [OBSCN_HUMAN]	15.83	1.10	3	4	6	7	7968	867.9	5.99
Q14789	Golgin subfamily B member 1 OS=Homo sapiens GN=GOLGB1 PE=1 SV=2 - [GOGB1_HUMAN]	15.82	2.18	7	4	6	7	3259	375.8	5.00
G3V2Z2	Ankyrin repeat and SOCS box protein 2 (Fragment) OS=Homo sapiens GN=ASB2 PE=4 SV=1 - [G3V2Z2_HUMAN]	15.81	9.15	5	1	2	5	481	53.1	6.28
Q8IZC6	Collagen alpha-1(XXVII) chain OS=Homo sapiens GN=COL27A1 PE=1 SV=1 - [CORA1_HUMAN]	15.71	5.97	3	7	7	8	1860	186.8	9.82
Q8IVF4	Dynein heavy chain 10, axonemal OS=Homo sapiens GN=DNAH10 PE=1 SV=4 - [DYH10_HUMAN]	15.64	2.19	4	5	6	7	4471	514.5	5.88
G5EA03	LIM and calponin homology domains-containing protein 1 OS=Homo sapiens GN=LIMCH1 PE=1 SV=1 - [G5EA03_HUMAN]	15.60	4.77	16	5	5	6	1467	164.3	6.35
B4DFX6	cDNA FLJ58791, highly similar to Ankyrin repeat domain-containing protein 35 OS=Homo sapiens PE=2 SV=1 - [B4DFX6_HUMAN]	15.60	5.93	3	3	4	7	910	100.2	5.77
Q6P4R2	Protocadherin alpha subfamily C, 2 OS=Homo sapiens GN=PCDHAC2 PE=2 SV=1 - [Q6P4R2_HUMAN]	15.59	3.08	2	2	2	7	1007	109.4	5.41
Q9P2K8	eIF-2-alpha kinase GCN2 OS=Homo sapiens GN=EIF2AK4 PE=1 SV=3 - [E2AK4_HUMAN]	15.53	1.64	3	1	2	6	1649	186.8	6.28
O95714	E3 ubiquitin-protein ligase HERC2 OS=Homo sapiens GN=HERC2 PE=1 SV=2 - [HERC2_HUMAN]	15.51	1.72	4	4	5	7	4834	526.9	6.28
O95425	Supervillin OS=Homo sapiens GN=SVIL PE=1 SV=2 - [SVIL_HUMAN]	15.44	2.76	6	5	5	6	2214	247.6	6.98
Q53G87	ENG protein (Endoglin) (Osler-Rendu-Weber syndrome 1) variant (Fragment) OS=Homo sapiens PE=2 SV=1 - [Q53G87_HUMAN]	15.43	13.84	9	1	3	6	318	34.1	7.62
F8VWK9	2'-5'-oligoadenylate synthase 3 OS=Homo sapiens GN=OAS3 PE=1 SV=1 - [F8VWK9_HUMAN]	15.42	12.99	5	1	3	6	177	19.5	9.70
A8K525	cDNA FLJ76817, highly similar to Homo sapiens non-POU domain containing, octamer-binding (NONO), mRNA OS=Homo sapiens PE=2 SV=1 - [A8K525_HUMAN]	15.38	8.07	5	3	3	5	471	54.3	9.20
H0YMN5	DNA helicase INO80 OS=Homo sapiens GN=INO80 PE=1 SV=1 - [H0YMN5_HUMAN]	15.33	4.08	3	2	3	7	1104	127.9	9.42
H9KVB4	Trinucleotide repeat-containing gene 18 protein OS=Homo sapiens GN=TNRC18 PE=1 SV=1 - [H9KVB4_HUMAN]	15.24	2.36	5	1	4	7	2968	314.3	8.73
P35247	Pulmonary surfactant-associated protein D OS=Homo sapiens GN=SFTPD PE=1 SV=3 - [SFTPD_HUMAN]	15.18	6.40	1	1	2	7	375	37.7	6.60
A0A0A0MTR7	E3 ubiquitin-protein ligase RNF213 OS=Homo sapiens GN=RNF213 PE=1 SV=1 - [A0A0A0MTR7_HUMAN]	15.14	1.40	5	3	6	7	5207	591.0	6.48
B2RAQ8	cDNA, FLJ95058, highly similar to Homo sapiens carnitine palmitoyltransferase 1A (liver) (CPT1A),nuclear gene encoding mitochondrial protein, mRNA OS=Homo sapiens PE=2 SV=1 - [B2RAQ8_HUMAN]	15.04	6.99	2	5	5	6	773	88.3	8.59
Q96Q27	Ankyrin repeat and SOCS box protein 2 OS=Homo sapiens GN=ASB2 PE=1 SV=1 - [ASB2_HUMAN]	14.96	4.60	3	1	2	5	587	65.0	7.62
Q53F65	Ets transcription factor TEL-2b variant (Fragment) OS=Homo sapiens PE=2 SV=1 - [Q53F65_HUMAN]	14.82	17.01	2	2	4	6	341	39.0	8.18
H0Y4R1	Inosine-5'-monophosphate dehydrogenase 2 (Fragment) OS=Homo sapiens GN=IMPDH2 PE=1 SV=1 - [H0Y4R1_HUMAN]	14.81	12.77	6	3	4	5	470	51.0	8.18
Q8TDM6	Disks large homolog 5 OS=Homo sapiens GN=DLG5 PE=1 SV=4 - [DLG5_HUMAN]	14.80	3.96	4	2	4	6	1919	213.7	7.42
Q5SZL2	Centrosomal protein of 85 kDa-like OS=Homo sapiens GN=CEP85L PE=1 SV=1 - [CE85L_HUMAN]	14.77	3.35	1	1	2	6	805	91.8	6.33
Q96HX3	Dolichyl-diphosphooligosaccharide--protein glycosyltransferase subunit 1 (Fragment) OS=Homo sapiens PE=2 SV=1 - [Q96HX3_HUMAN]	14.71	9.68	8	4	4	5	568	64.5	6.55
X6R3R3	Protein SOGA1 OS=Homo sapiens GN=SOGA1 PE=1 SV=1 - [X6R3R3_HUMAN]	14.71	3.15	5	2	3	6	1016	115.7	5.47
A0A087X173	Adenosine receptor A1 OS=Homo sapiens GN=ADORA1 PE=1 SV=1 - [A0A087X173_HUMAN]	14.66	6.67	5	1	1	6	210	24.1	8.44
O14795	Protein unc-13 homolog B OS=Homo sapiens GN=UNC13B PE=1 SV=2 - [UN13B_HUMAN]	14.63	3.46	11	1	4	6	1591	180.6	5.99
Q8N309	Leucine-rich repeat-containing protein 43 OS=Homo sapiens GN=LRRC43 PE=2 SV=2 - [LRC43_HUMAN]	14.60	3.05	1	1	2	5	656	73.0	5.24
V9H0H7	HSPC022 OS=Homo sapiens PE=2 SV=1 - [V9H0H7_HUMAN]	14.56	8.96	1	2	2	6	201	22.3	9.33
Q9H4B0	Probable tRNA N6-adenosine threonylcarbamoyltransferase, mitochondrial OS=Homo sapiens GN=OSGEPL1 PE=2 SV=2 - [OSGP2_HUMAN]	14.52	3.14	1	1	1	6	414	45.1	8.56
Q6NSH7	EEF1A1 protein OS=Homo sapiens GN=EEF1A1 PE=2 SV=1 - [Q6NSH7_HUMAN]	14.46	34.23	2	1	3	5	111	12.9	9.80
Q9BYX7	Putative beta-actin-like protein 3 OS=Homo sapiens GN=POTEKP PE=5 SV=1 - [ACTBM_HUMAN]	14.43	13.87	29	1	4	5	375	42.0	6.33
E9PRF4	Histone-lysine N-methyltransferase (Fragment) OS=Homo sapiens GN=SETDB1 PE=1 SV=1 - [E9PRF4_HUMAN]	14.41	5.64	4	2	4	6	1259	139.3	6.21
Q12882	Dihydropyrimidine dehydrogenase [NADP(+)] OS=Homo sapiens GN=DPYD PE=1 SV=2 - [DPYD_HUMAN]	14.38	3.80	1	2	3	6	1025	111.3	7.05
Q9P0K0	Putative zinc finger protein OS=Homo sapiens PE=2 SV=1 - [Q9P0K0_HUMAN]	14.34	3.88	1	1	2	5	1212	135.0	8.00
F5GXF5	Nucleosome-remodeling factor subunit BPTF (Fragment) OS=Homo sapiens GN=BPTF PE=1 SV=2 - [F5GXF5_HUMAN]	14.22	3.70	6	5	6	6	2457	271.4	6.13
Q59H95	Flightless I homolog variant (Fragment) OS=Homo sapiens PE=2 SV=1 - [Q59H95_HUMAN]	14.22	6.09	8	4	5	5	1101	125.2	5.26
A1L3B5	Calcium-transporting ATPase OS=Homo sapiens GN=ATP2B3 PE=2 SV=1 - [A1L3B5_HUMAN]	14.19	5.26	6	2	4	6	874	95.4	5.73
A0A087WVH3	Patched domain-containing protein 3 OS=Homo sapiens GN=PTCHD3 PE=4 SV=1 - [A0A087WVH3_HUMAN]	14.17	1.88	2	1	1	6	533	59.6	6.60
Q8NG31	Kinetochore scaffold 1 OS=Homo sapiens GN=KNL1 PE=1 SV=3 - [KNL1_HUMAN]	14.16	4.27	4	2	6	6	2342	265.2	5.47
Q58A70	Polypeptide N-acetylgalactosaminyltransferase OS=Homo sapiens GN=GalNAc-T10 PE=2 SV=1 - [Q58A70_HUMAN]	14.14	4.65	4	1	2	6	581	67.0	6.71
Q8TD57	Dynein heavy chain 3, axonemal OS=Homo sapiens GN=DNAH3 PE=2 SV=1 - [DYH3_HUMAN]	14.12	1.75	2	5	5	6	4116	470.5	6.43
A8MSP2	RAB37, member RAS oncogene family, isoform CRA_e OS=Homo sapiens GN=RAB37 PE=1 SV=1 - [A8MSP2_HUMAN]	14.11	9.34	7	1	2	6	182	20.1	5.87
Q9UEH6	A6(IV) collagen (Fragment) OS=Homo sapiens GN=COL4A6 PE=3 SV=1 - [Q9UEH6_HUMAN]	14.11	5.06	8	2	4	6	1600	153.7	9.32
A0A096LNH2	EF-hand calcium-binding domain-containing protein 8 OS=Homo sapiens GN=EFCAB8 PE=4 SV=1 - [A0A096LNH2_HUMAN]	14.11	6.75	2	3	5	6	1288	145.8	8.90
D3DR32	M-phase phosphoprotein 1, isoform CRA_a OS=Homo sapiens GN=MPHOSPH1 PE=3 SV=1 - [D3DR32_HUMAN]	14.08	4.38	4	3	5	6	1780	206.0	5.80
I6L894	Ankyrin-2 OS=Homo sapiens GN=ANK2 PE=1 SV=1 - [I6L894_HUMAN]	14.04	2.34	10	4	6	6	3924	430.0	5.12
A0A087X0X3	Heterogeneous nuclear ribonucleoprotein M OS=Homo sapiens GN=HNRNPM PE=1 SV=1 - [A0A087X0X3_HUMAN]	14.04	7.81	15	3	3	5	730	77.5	8.78
B0I1S0	DYNC2H1 variant protein OS=Homo sapiens PE=2 SV=1 - [B0I1S0_HUMAN]	14.02	2.02	3	5	6	6	4307	492.3	6.52
Q8TDI7	Transmembrane channel-like protein 2 OS=Homo sapiens GN=TMC2 PE=2 SV=3 - [TMC2_HUMAN]	14.01	7.17	1	3	5	6	906	102.5	9.47
A0A0C4DG40	Nesprin-1 OS=Homo sapiens GN=SYNE1 PE=1 SV=1 - [A0A0C4DG40_HUMAN]	14.01	0.67	8	4	5	6	8749	1004.6	5.52
E7EPN9	Protein PRRC2C OS=Homo sapiens GN=PRRC2C PE=1 SV=1 - [E7EPN9_HUMAN]	13.94	2.59	6	5	5	6	2819	308.6	9.07
Q8IXS2	Coiled-coil domain-containing protein 65 OS=Homo sapiens GN=CCDC65 PE=1 SV=2 - [CCD65_HUMAN]	13.93	8.88	3	3	4	6	484	57.3	7.43
P25054	Adenomatous polyposis coli protein OS=Homo sapiens GN=APC PE=1 SV=2 - [APC_HUMAN]	13.92	3.38	8	5	6	6	2843	311.5	7.80
A0A024RBC7	Calcium-transporting ATPase OS=Homo sapiens GN=ATP2B1 PE=3 SV=1 - [A0A024RBC7_HUMAN]	13.90	5.08	10	3	4	6	1220	134.6	5.91
D3DTX7	Collagen, type I, alpha 1, isoform CRA_a OS=Homo sapiens GN=COL1A1 PE=4 SV=1 - [D3DTX7_HUMAN]	13.88	8.93	4	3	5	6	885	84.7	6.24
Q9UPY3	Endoribonuclease Dicer OS=Homo sapiens GN=DICER1 PE=1 SV=3 - [DICER_HUMAN]	13.87	4.89	5	5	6	6	1922	218.5	5.68
Q59H95	Flightless I homolog variant (Fragment) OS=Homo sapiens PE=2 SV=1 - [Q59H95_HUMAN]	13.87	2.54	6	2	2	5	1101	125.2	5.26
Q3V6T2	Girdin OS=Homo sapiens GN=CCDC88A PE=1 SV=2 - [GRDN_HUMAN]	13.81	3.05	9	3	4	6	1871	215.9	6.21
Q9Y4C8	Probable RNA-binding protein 19 OS=Homo sapiens GN=RBM19 PE=1 SV=3 - [RBM19_HUMAN]	13.79	4.38	2	4	4	6	960	107.3	6.54
Q8IZT6	Abnormal spindle-like microcephaly-associated protein OS=Homo sapiens GN=ASPM PE=1 SV=2 - [ASPM_HUMAN]	13.76	1.90	7	3	5	6	3477	409.5	10.45
P56182	Ribosomal RNA processing protein 1 homolog A OS=Homo sapiens GN=RRP1 PE=1 SV=1 - [RRP1_HUMAN]	13.76	13.02	5	1	4	6	461	52.8	9.33
P81605	Dermcidin OS=Homo sapiens GN=DCD PE=1 SV=2 - [DCD_HUMAN]	13.73	22.73	1	2	2	4	110	11.3	6.54
B4DTY7	cDNA FLJ57813, weakly similar to p130Cas-associated protein OS=Homo sapiens PE=2 SV=1 - [B4DTY7_HUMAN]	13.73	3.66	7	1	5	6	1532	167.9	6.86
Q8N1A0	Keratin-like protein KRT222 OS=Homo sapiens GN=KRT222 PE=2 SV=1 - [KT222_HUMAN]	13.73	8.47	1	1	2	4	295	34.1	5.87
Q96BY7	Autophagy-related protein 2 homolog B OS=Homo sapiens GN=ATG2B PE=1 SV=5 - [ATG2B_HUMAN]	13.72	2.94	2	4	5	6	2078	232.6	5.76
P62191	26S protease regulatory subunit 4 OS=Homo sapiens GN=PSMC1 PE=1 SV=1 - [PRS4_HUMAN]	13.71	8.64	12	2	3	5	440	49.2	6.21
P35580	Myosin-10 OS=Homo sapiens GN=MYH10 PE=1 SV=3 - [MYH10_HUMAN]	13.66	2.78	6	1	5	5	1976	228.9	5.54
A8K2G7	cDNA FLJ76071, highly similar to Homo sapiens filamin A interacting protein 1 (FILIP1), mRNA OS=Homo sapiens PE=2 SV=1 - [A8K2G7_HUMAN]	13.64	5.44	3	3	6	6	1213	138.0	8.32
A0A024RCZ7	Chromosome 6 open reading frame 49, isoform CRA_c OS=Homo sapiens GN=C6orf49 PE=4 SV=1 - [A0A024RCZ7_HUMAN]	13.59	3.85	1	1	1	6	312	33.3	7.99
Q9H5S1	cDNA: FLJ23121 fis, clone LNG07996 OS=Homo sapiens PE=2 SV=1 - [Q9H5S1_HUMAN]	13.56	13.40	4	1	5	6	612	70.0	8.92
Q92576	PHD finger protein 3 OS=Homo sapiens GN=PHF3 PE=1 SV=3 - [PHF3_HUMAN]	13.50	4.22	9	6	6	6	2039	229.3	6.96
Q6S8J3	POTE ankyrin domain family member E OS=Homo sapiens GN=POTEE PE=2 SV=3 - [POTEE_HUMAN]	13.48	3.63	18	1	3	5	1075	121.3	6.20
L8EAQ1	Alternative protein WDR65 OS=Homo sapiens GN=WDR65 PE=4 SV=1 - [L8EAQ1_HUMAN]	13.46	12.87	1	1	1	6	101	11.6	11.52
Q8TE73	Dynein heavy chain 5, axonemal OS=Homo sapiens GN=DNAH5 PE=1 SV=3 - [DYH5_HUMAN]	13.41	1.34	2	4	5	6	4624	528.7	6.10
Q9Y2H9	Microtubule-associated serine/threonine-protein kinase 1 OS=Homo sapiens GN=MAST1 PE=1 SV=2 - [MAST1_HUMAN]	13.39	1.91	1	2	2	5	1570	170.6	8.44
Q9BRH9	Zinc finger protein 251 OS=Homo sapiens GN=ZNF251 PE=2 SV=4 - [ZN251_HUMAN]	13.39	5.96	1	2	3	6	671	75.7	9.17
Q12965	Unconventional myosin-Ie OS=Homo sapiens GN=MYO1E PE=1 SV=2 - [MYO1E_HUMAN]	13.37	3.88	6	3	3	4	1108	127.0	8.92
A0A140T9I7	Collagen alpha-2(XI) chain (Fragment) OS=Homo sapiens GN=COL11A2 PE=1 SV=1 - [A0A140T9I7_HUMAN]	13.37	6.22	16	6	6	6	1623	159.2	7.52
B7ZM24	SLC12A2 protein OS=Homo sapiens GN=SLC12A2 PE=2 SV=1 - [B7ZM24_HUMAN]	13.37	4.10	2	1	3	6	1196	129.6	6.46
Q9Y6M1	Insulin-like growth factor 2 mRNA-binding protein 2 OS=Homo sapiens GN=IGF2BP2 PE=1 SV=2 - [IF2B2_HUMAN]	13.36	3.67	3	1	2	6	599	66.1	8.46
E1NZA1	Peroxisome proliferator activated receptor interacting complex protein OS=Homo sapiens GN=PRIC295 PE=2 SV=1 - [E1NZA1_HUMAN]	13.35	2.13	3	3	4	7	2671	292.6	7.43
Q4VXL4	HCG41426, isoform CRA_c OS=Homo sapiens GN=TACC2 PE=1 SV=1 - [Q4VXL4_HUMAN]	13.35	7.30	11	1	3	5	575	64.6	5.34
Q2NNQ8	FER-1-like protein 4 OS=Homo sapiens GN=FER1L4 PE=2 SV=1 - [Q2NNQ8_HUMAN]	13.31	1.46	2	2	2	5	2055	230.0	5.97
Q6ZVP4	cDNA FLJ42258 fis, clone TKIDN2010934 OS=Homo sapiens PE=2 SV=1 - [Q6ZVP4_HUMAN]	13.30	17.95	1	2	2	6	234	24.9	10.23
Q02413	Desmoglein-1 OS=Homo sapiens GN=DSG1 PE=1 SV=2 - [DSG1_HUMAN]	13.30	4.67	1	3	3	5	1049	113.7	5.03
C9J7T7	Nuclear receptor corepressor 2 OS=Homo sapiens GN=NCOR2 PE=1 SV=3 - [C9J7T7_HUMAN]	13.30	4.27	10	6	6	6	2062	220.9	7.34
Q96JB3	Hypermethylated in cancer 2 protein OS=Homo sapiens GN=HIC2 PE=1 SV=2 - [HIC2_HUMAN]	13.29	1.63	1	1	1	5	615	66.1	6.38
O60284	Suppression of tumorigenicity 18 protein OS=Homo sapiens GN=ST18 PE=1 SV=1 - [ST18_HUMAN]	13.28	3.82	6	1	3	6	1047	115.1	6.06
Q9BXM0	Periaxin OS=Homo sapiens GN=PRX PE=1 SV=2 - [PRAX_HUMAN]	13.27	4.72	1	2	5	6	1461	154.8	7.50
E9PJZ4	Mediator of RNA polymerase II transcription subunit 17 (Fragment) OS=Homo sapiens GN=MED17 PE=1 SV=1 - [E9PJZ4_HUMAN]	13.27	30.07	5	1	3	5	143	16.3	8.73
C4B7M4	Spatacsin OS=Homo sapiens GN=SPG11 PE=2 SV=1 - [C4B7M4_HUMAN]	13.26	3.40	5	4	5	6	2443	278.7	5.97
Q5JTC6	APC membrane recruitment protein 1 OS=Homo sapiens GN=AMER1 PE=1 SV=2 - [AMER1_HUMAN]	13.25	2.29	1	2	2	5	1135	124.0	4.84
B4DE69	cDNA FLJ56053, highly similar to Serine/threonine-protein phosphatase 2A 65 kDa regulatory subunit A alpha isoform OS=Homo sapiens PE=2 SV=1 - [B4DE69_HUMAN]	13.24	10.67	10	4	4	5	534	59.1	5.68
B9EG70	Nuclear protein, ataxia-telangiectasia locus OS=Homo sapiens GN=NPAT PE=2 SV=1 - [B9EG70_HUMAN]	13.23	1.96	2	1	2	6	1427	154.2	5.94
A0A1B0GVZ5	EF-hand domain-containing protein 1 (Fragment) OS=Homo sapiens GN=EFHC1 PE=1 SV=1 - [A0A1B0GVZ5_HUMAN]	13.23	91.67	16	1	1	5	12	1.5	6.37
B0QYQ6	Kazrin (Fragment) OS=Homo sapiens GN=KAZN PE=1 SV=1 - [B0QYQ6_HUMAN]	13.22	6.02	4	1	1	6	166	19.2	8.27
Q8WXX0	Dynein heavy chain 7, axonemal OS=Homo sapiens GN=DNAH7 PE=1 SV=2 - [DYH7_HUMAN]	13.22	1.14	1	3	3	6	4024	460.9	6.00
A0A087WY00	Unconventional myosin-Va OS=Homo sapiens GN=MYO5A PE=1 SV=1 - [A0A087WY00_HUMAN]	13.11	4.54	8	6	6	6	1828	212.1	8.63
Q59ET3	Chaperonin containing TCP1, subunit 6A isoform a variant (Fragment) OS=Homo sapiens PE=2 SV=1 - [Q59ET3_HUMAN]	13.10	9.64	8	2	4	5	529	57.7	6.67
L8EC72	Alternative protein MIER1 OS=Homo sapiens GN=MIER1 PE=4 SV=1 - [L8EC72_HUMAN]	13.08	25.49	1	1	1	9	51	6.2	11.88
B7ZLW1	CAMSAP1 protein OS=Homo sapiens GN=CAMSAP1 PE=2 SV=1 - [B7ZLW1_HUMAN]	13.07	2.32	2	2	3	5	1467	163.2	6.95
Q6ZU80	Centrosomal protein of 128 kDa OS=Homo sapiens GN=CEP128 PE=1 SV=2 - [CE128_HUMAN]	13.07	2.38	5	2	2	6	1094	127.9	6.52
Q7KZ24	Nuclease sensitive element binding protein-1 OS=Homo sapiens PE=2 SV=1 - [Q7KZ24_HUMAN]	13.06	17.08	11	3	3	4	322	34.7	7.53
Q5SR47	Complement receptor type 2 OS=Homo sapiens GN=CR2 PE=1 SV=1 - [Q5SR47_HUMAN]	13.05	2.16	1	1	2	6	971	106.3	7.53
Q5JY90	Tyrosine-protein kinase OS=Homo sapiens GN=BTK PE=1 SV=1 - [Q5JY90_HUMAN]	13.04	9.94	4	3	3	6	483	55.8	8.03
Q6ZR44	cDNA FLJ46672 fis, clone TRACH3009008, highly similar to Thioredoxin reductase (EC 1.6.4.5) OS=Homo sapiens PE=2 SV=1 - [Q6ZR44_HUMAN]	13.00	9.81	18	4	4	5	581	63.9	7.99
B7Z297	cDNA FLJ50488, highly similar to Homo sapiens angel homolog 2 (Drosophila) (ANGEL2), mRNA OS=Homo sapiens PE=2 SV=1 - [B7Z297_HUMAN]	12.90	9.33	4	1	3	5	418	47.2	6.43
Q0VDD8	Dynein heavy chain 14, axonemal OS=Homo sapiens GN=DNAH14 PE=2 SV=3 - [DYH14_HUMAN]	12.87	1.28	1	1	3	5	3507	399.6	6.93
P02458	Collagen alpha-1(II) chain OS=Homo sapiens GN=COL2A1 PE=1 SV=3 - [CO2A1_HUMAN]	12.86	6.32	1	4	5	6	1487	141.7	6.92
Q2VPJ6	HSP90AA1 protein (Fragment) OS=Homo sapiens GN=HSP90AA1 PE=2 SV=1 - [Q2VPJ6_HUMAN]	12.81	10.09	10	2	5	5	585	68.3	5.19
E7EVA0	Microtubule-associated protein OS=Homo sapiens GN=MAP4 PE=1 SV=1 - [E7EVA0_HUMAN]	12.79	4.09	10	4	5	5	2297	245.3	6.23
K7EL76	Kinesin light chain 3 (Fragment) OS=Homo sapiens GN=KLC3 PE=1 SV=8 - [K7EL76_HUMAN]	12.78	7.83	4	1	2	5	396	43.8	5.80
Q53HT3	Heat shock transcription factor 1 variant (Fragment) OS=Homo sapiens PE=2 SV=1 - [Q53HT3_HUMAN]	12.76	8.70	5	3	3	5	529	57.2	5.19
Q59FD9	Actinin, alpha 2 variant (Fragment) OS=Homo sapiens PE=2 SV=1 - [Q59FD9_HUMAN]	12.76	4.67	4	1	2	4	664	76.9	5.39
Q6UXI9	Nephronectin OS=Homo sapiens GN=NPNT PE=2 SV=3 - [NPNT_HUMAN]	12.74	6.02	2	2	2	5	565	61.9	8.34
Q659E8	Putative uncharacterized protein DKFZp564H1664 OS=Homo sapiens GN=DKFZp564H1664 PE=2 SV=1 - [Q659E8_HUMAN]	12.73	5.87	2	1	2	6	375	42.4	8.88
Q53F19	Nuclear cap-binding protein subunit 3 OS=Homo sapiens GN=NCBP3 PE=1 SV=2 - [NCBP3_HUMAN]	12.69	1.94	1	1	1	5	620	70.5	5.73
A0A024R4A1	HCG32657, isoform CRA_a OS=Homo sapiens GN=hCG_32657 PE=3 SV=1 - [A0A024R4A1_HUMAN]	12.68	8.33	5	2	3	5	444	50.0	7.06
E7EN95	Filamin-B OS=Homo sapiens GN=FLNB PE=1 SV=1 - [E7EN95_HUMAN]	12.65	2.57	4	4	4	5	2409	256.1	5.73
Q59GF8	Heat shock 70kDa protein 4 isoform a variant (Fragment) OS=Homo sapiens PE=2 SV=1 - [Q59GF8_HUMAN]	12.63	8.18	7	1	3	5	782	87.9	5.55
D3YTK1	B-cell lymphoma/leukemia 11B OS=Homo sapiens GN=BCL11B PE=1 SV=1 - [D3YTK1_HUMAN]	12.56	4.86	5	1	2	5	700	75.3	7.58
Q709C8	Vacuolar protein sorting-associated protein 13C OS=Homo sapiens GN=VPS13C PE=1 SV=1 - [VP13C_HUMAN]	12.56	2.26	4	4	4	5	3753	422.1	6.83
K7EPP7	DnaJ homolog subfamily C member 7 OS=Homo sapiens GN=DNAJC7 PE=1 SV=1 - [K7EPP7_HUMAN]	12.49	24.51	15	5	5	5	253	28.7	8.48
B4DDH9	cDNA FLJ53820, highly similar to U4/U6.U5 tri-snRNP-associated protein 1 OS=Homo sapiens PE=2 SV=1 - [B4DDH9_HUMAN]	12.39	1.71	2	1	1	5	642	73.4	5.21
Q8NCN4	E3 ubiquitin-protein ligase RNF169 OS=Homo sapiens GN=RNF169 PE=1 SV=2 - [RN169_HUMAN]	12.35	3.25	1	2	2	5	708	77.1	9.10
Q03989	AT-rich interactive domain-containing protein 5A OS=Homo sapiens GN=ARID5A PE=1 SV=2 - [ARI5A_HUMAN]	12.34	7.74	5	1	3	5	594	64.0	9.25
A8K690	cDNA FLJ76863, highly similar to Homo sapiens stress-induced-phosphoprotein 1 (Hsp70/Hsp90-organizing protein) (STIP1), mRNA OS=Homo sapiens PE=2 SV=1 - [A8K690_HUMAN]	12.31	9.39	5	4	4	5	543	62.6	6.80
Q0QF12	Succinate dehydrogenase (quinone) (Fragment) OS=Homo sapiens GN=SDHA PE=2 SV=1 - [Q0QF12_HUMAN]	12.28	8.55	7	2	3	5	550	60.0	6.87
O14660	GARS-AIRS-GART (Fragment) OS=Homo sapiens PE=2 SV=1 - [O14660_HUMAN]	12.27	13.86	4	1	1	5	101	10.7	9.94
Q5C9Z4	Nucleolar MIF4G domain-containing protein 1 OS=Homo sapiens GN=NOM1 PE=1 SV=1 - [NOM1_HUMAN]	12.25	7.67	1	3	4	6	860	96.2	8.10
Q03252	Lamin-B2 OS=Homo sapiens GN=LMNB2 PE=1 SV=4 - [LMNB2_HUMAN]	12.24	5.81	1	2	3	5	620	69.9	5.59
Q9HB00	Desmocollin 1, isoform CRA_b OS=Homo sapiens GN=DSC1 PE=4 SV=1 - [Q9HB00_HUMAN]	12.24	4.40	2	3	3	4	840	93.8	5.53
F5GWG3	Retinoic acid-induced protein 3 (Fragment) OS=Homo sapiens GN=GPRC5A PE=1 SV=8 - [F5GWG3_HUMAN]	12.11	4.76	3	1	1	3	273	30.5	9.03
Q5T0Z8	Uncharacterized protein C6orf132 OS=Homo sapiens GN=C6orf132 PE=1 SV=4 - [CF132_HUMAN]	12.06	6.14	1	4	4	5	1188	124.0	9.45
Q9NY74	Ewing's tumor-associated antigen 1 OS=Homo sapiens GN=ETAA1 PE=1 SV=2 - [ETAA1_HUMAN]	12.06	8.10	1	4	4	6	926	103.4	7.62
J3KNM7	Collagen, type IV, alpha 4, isoform CRA_a OS=Homo sapiens GN=COL4A4 PE=3 SV=1 - [J3KNM7_HUMAN]	12.06	4.98	2	4	5	5	1687	163.6	8.59
B7ZLG9	C1orf127 protein OS=Homo sapiens GN=C1orf127 PE=2 SV=1 - [B7ZLG9_HUMAN]	12.05	6.48	7	2	4	5	648	69.0	5.35
B3KX72	cDNA FLJ44920 fis, clone BRAMY3011501, highly similar to Heterogeneous nuclear ribonucleoprotein U OS=Homo sapiens PE=2 SV=1 - [B3KX72_HUMAN]	12.03	7.73	6	3	4	5	750	83.0	8.79
B3KY43	cDNA FLJ46798 fis, clone TRACH3031660, highly similar to cAMP-dependent protein kinase type II-beta regulatory subunit OS=Homo sapiens PE=2 SV=1 - [B3KY43_HUMAN]	11.98	12.84	10	3	3	4	405	44.8	5.16
A0A024R2Y4	Bassoon (Presynaptic cytomatrix protein), isoform CRA_a OS=Homo sapiens GN=BSN PE=4 SV=1 - [A0A024R2Y4_HUMAN]	11.96	1.73	2	3	5	5	3926	416.2	7.55
P21281	V-type proton ATPase subunit B, brain isoform OS=Homo sapiens GN=ATP6V1B2 PE=1 SV=3 - [VATB2_HUMAN]	11.95	11.35	11	3	5	5	511	56.5	5.81
Q71UH4	DNA topoisomerase 2 (Fragment) OS=Homo sapiens GN=TOP2B PE=3 SV=1 - [Q71UH4_HUMAN]	11.95	4.82	8	1	5	5	1598	180.5	7.94
A0A024QZ61	Myomesin (M-protein) 2, 165kDa, isoform CRA_c OS=Homo sapiens GN=MYOM2 PE=4 SV=1 - [A0A024QZ61_HUMAN]	11.92	4.71	5	4	5	5	1465	164.8	6.19
Q70EK8	Inactive ubiquitin carboxyl-terminal hydrolase 53 OS=Homo sapiens GN=USP53 PE=1 SV=2 - [UBP53_HUMAN]	11.88	4.57	1	2	3	5	1073	120.7	7.59
F8VR31	DNA replication ATP-dependent helicase/nuclease DNA2 OS=Homo sapiens GN=DNA2 PE=1 SV=3 - [F8VR31_HUMAN]	11.87	6.00	2	2	3	5	867	98.6	7.97
B3KX30	cDNA FLJ44557 fis, clone UTERU3007913, highly similar to FERM domain-containing protein 6 OS=Homo sapiens PE=2 SV=1 - [B3KX30_HUMAN]	11.86	7.16	5	3	3	5	545	62.9	7.31
B3KSD3	cDNA FLJ36024 fis, clone TESTI2016667, highly similar to Homo sapiens zinc finger CCCH-type containing 12A (ZC3H12A), mRNA OS=Homo sapiens PE=2 SV=1 - [B3KSD3_HUMAN]	11.86	2.79	2	1	1	5	394	41.7	8.15
Q701L7	Type II hair keratin 2 OS=Homo sapiens GN=KRTHB2 PE=2 SV=1 - [Q701L7_HUMAN]	11.86	2.92	2	1	1	5	513	56.6	6.74
Q9BTC0	Death-inducer obliterator 1 OS=Homo sapiens GN=DIDO1 PE=1 SV=5 - [DIDO1_HUMAN]	11.85	1.88	1	2	3	5	2240	243.7	7.88
Q9UIF8	Bromodomain adjacent to zinc finger domain protein 2B OS=Homo sapiens GN=BAZ2B PE=1 SV=3 - [BAZ2B_HUMAN]	11.85	3.09	5	5	5	5	2168	240.3	6.54
Q59HC4	Phosphoinositide-3-kinase, catalytic, delta polypeptide variant (Fragment) OS=Homo sapiens PE=2 SV=1 - [Q59HC4_HUMAN]	11.83	2.49	10	2	2	5	845	96.6	7.58
Q9Y446	Plakophilin-3 OS=Homo sapiens GN=PKP3 PE=1 SV=1 - [PKP3_HUMAN]	11.82	9.16	6	5	5	5	797	87.0	9.32
D3DS15	Uncharacterized protein OS=Homo sapiens GN=FLJ10357 PE=4 SV=1 - [D3DS15_HUMAN]	11.81	3.27	4	2	4	5	1498	162.7	6.47
C9JB63	Enoyl-CoA delta isomerase 2, mitochondrial (Fragment) OS=Homo sapiens GN=ECI2 PE=1 SV=1 - [C9JB63_HUMAN]	11.80	27.73	12	1	3	4	220	24.0	9.64
Q96DT5	Dynein heavy chain 11, axonemal OS=Homo sapiens GN=DNAH11 PE=1 SV=4 - [DYH11_HUMAN]	11.78	1.06	8	2	5	5	4516	520.0	6.44
Q8N2W3	FAM78A protein (Fragment) OS=Homo sapiens GN=FAM78A PE=2 SV=2 - [Q8N2W3_HUMAN]	11.78	18.41	4	1	2	5	201	22.9	9.23
P12111	Collagen alpha-3(VI) chain OS=Homo sapiens GN=COL6A3 PE=1 SV=5 - [CO6A3_HUMAN]	11.78	2.36	6	5	5	5	3177	343.5	6.68
F8W8Y7	Armadillo repeat-containing X-linked protein 4 OS=Homo sapiens GN=ARMCX4 PE=1 SV=3 - [F8W8Y7_HUMAN]	11.77	3.93	1	5	5	5	2290	235.8	5.83
Q9NUC0	SERTA domain-containing protein 4 OS=Homo sapiens GN=SERTAD4 PE=2 SV=1 - [SRTD4_HUMAN]	11.72	6.74	1	2	2	5	356	39.3	6.71
Q92608	Dedicator of cytokinesis protein 2 OS=Homo sapiens GN=DOCK2 PE=1 SV=2 - [DOCK2_HUMAN]	11.72	3.93	7	4	5	5	1830	211.8	6.87
Q9UHJ3	Scm-like with four MBT domains protein 1 OS=Homo sapiens GN=SFMBT1 PE=1 SV=2 - [SMBT1_HUMAN]	11.70	1.39	1	1	1	5	866	98.1	6.21
H0Y9Q7	Calnexin (Fragment) OS=Homo sapiens GN=CANX PE=1 SV=1 - [H0Y9Q7_HUMAN]	11.68	16.47	13	2	2	4	170	18.8	6.92
Q8WZ64	Arf-GAP with Rho-GAP domain, ANK repeat and PH domain-containing protein 2 OS=Homo sapiens GN=ARAP2 PE=1 SV=3 - [ARAP2_HUMAN]	11.68	4.05	4	2	5	5	1704	193.3	7.39
Q86Y46	Keratin, type II cytoskeletal 73 OS=Homo sapiens GN=KRT73 PE=1 SV=1 - [K2C73_HUMAN]	11.67	4.44	3	1	3	5	540	58.9	7.23
A0A088AWL3	Nuclear receptor corepressor 1 OS=Homo sapiens GN=NCOR1 PE=1 SV=1 - [A0A088AWL3_HUMAN]	11.66	1.88	17	3	3	5	2343	258.8	6.95
B4DYS9	cDNA FLJ52175, highly similar to Nuclear receptor coactivator 3 (EC 2.3.1.48) OS=Homo sapiens PE=2 SV=1 - [B4DYS9_HUMAN]	11.64	5.45	7	1	1	5	257	28.1	9.22
B7Z3E3	Reticulon OS=Homo sapiens PE=2 SV=1 - [B7Z3E3_HUMAN]	11.56	4.24	3	2	3	5	920	100.8	4.93
Q13332	Receptor-type tyrosine-protein phosphatase S OS=Homo sapiens GN=PTPRS PE=1 SV=3 - [PTPRS_HUMAN]	11.55	1.80	6	2	3	5	1948	216.9	6.46
A0AVG3	t-SNARE domain containing 1 OS=Homo sapiens GN=TSNARE1 PE=1 SV=1 - [A0AVG3_HUMAN]	11.55	12.26	5	1	4	5	514	56.0	9.01
A0A1B0GTU3	Kinesin-like protein KIF16B OS=Homo sapiens GN=KIF16B PE=1 SV=1 - [A0A1B0GTU3_HUMAN]	11.54	3.87	3	1	3	5	1266	146.2	6.15
F5GWJ5	Roundabout homolog 3 OS=Homo sapiens GN=ROBO3 PE=1 SV=1 - [F5GWJ5_HUMAN]	11.53	4.18	9	3	4	5	1364	146.0	7.23
Q12955	Ankyrin-3 OS=Homo sapiens GN=ANK3 PE=1 SV=3 - [ANK3_HUMAN]	11.51	1.35	2	1	4	5	4377	480.1	6.49
A6NJ38	Rho GTPase-activating protein 22 OS=Homo sapiens GN=ARHGAP22 PE=1 SV=1 - [A6NJ38_HUMAN]	11.49	10.76	5	4	4	5	539	58.6	7.23
Q9NR48	Histone-lysine N-methyltransferase ASH1L OS=Homo sapiens GN=ASH1L PE=1 SV=2 - [ASH1L_HUMAN]	11.49	2.22	2	5	5	5	2969	332.6	9.39
E5RI94	TBC1 domain family member 31 OS=Homo sapiens GN=TBC1D31 PE=1 SV=1 - [E5RI94_HUMAN]	11.47	5.81	6	1	4	5	620	73.4	8.70
P35913	Rod cGMP-specific 3',5'-cyclic phosphodiesterase subunit beta OS=Homo sapiens GN=PDE6B PE=1 SV=2 - [PDE6B_HUMAN]	11.46	4.10	3	2	3	5	854	98.3	5.24
Q9Y5I2	Protocadherin alpha-10 OS=Homo sapiens GN=PCDHA10 PE=2 SV=1 - [PCDAA_HUMAN]	11.46	3.27	1	1	3	5	948	102.8	5.17
B3KUK3	cDNA FLJ40080 fis, clone TESTI2001795, highly similar to Homo sapiens regulator of G-protein signalling 22 (RGS22), mRNA OS=Homo sapiens PE=2 SV=1 - [B3KUK3_HUMAN]	11.45	3.98	6	2	2	4	653	76.3	8.76
Q9NZJ4	Sacsin OS=Homo sapiens GN=SACS PE=1 SV=2 - [SACS_HUMAN]	11.44	0.96	1	3	4	5	4579	520.8	7.05
Q96N23	Cilia- and flagella-associated protein 54 OS=Homo sapiens GN=CFAP54 PE=2 SV=3 - [CFA54_HUMAN]	11.43	1.81	2	4	5	5	3096	351.7	8.10
Q9Y6V0	Protein piccolo OS=Homo sapiens GN=PCLO PE=1 SV=4 - [PCLO_HUMAN]	11.42	1.48	3	5	5	5	5065	552.9	6.51
G3V419	DNA mismatch repair protein Mlh3 OS=Homo sapiens GN=MLH3 PE=1 SV=1 - [G3V419_HUMAN]	11.41	2.82	9	3	3	5	1275	143.4	6.89
Q8IYW2	Cilia- and flagella-associated protein 46 OS=Homo sapiens GN=CFAP46 PE=2 SV=3 - [CFA46_HUMAN]	11.41	2.73	1	4	5	5	2715	303.3	7.36
Q14966	Zinc finger protein 638 OS=Homo sapiens GN=ZNF638 PE=1 SV=2 - [ZN638_HUMAN]	11.39	3.49	4	1	5	5	1978	220.5	6.38
Q2WGJ9	Fer-1-like protein 6 OS=Homo sapiens GN=FER1L6 PE=2 SV=2 - [FR1L6_HUMAN]	11.39	3.07	1	3	3	4	1857	209.2	6.38
B0AZM4	cDNA, FLJ79464, highly similar to Homo sapiens aquarius (Fragment) OS=Homo sapiens PE=2 SV=1 - [B0AZM4_HUMAN]	11.37	4.66	3	3	3	5	1353	156.7	7.09
B4E3S8	cDNA FLJ61581, highly similar to Inversin OS=Homo sapiens PE=2 SV=1 - [B4E3S8_HUMAN]	11.35	5.36	3	2	4	5	988	109.8	9.35
A0A140T997	HLA class I histocompatibility antigen, B-46 alpha chain (Fragment) OS=Homo sapiens GN=HLA-B PE=1 SV=1 - [A0A140T997_HUMAN]	11.34	14.63	204	1	3	5	246	27.8	6.32
Q8IY18	Structural maintenance of chromosomes protein 5 OS=Homo sapiens GN=SMC5 PE=1 SV=2 - [SMC5_HUMAN]	11.32	4.63	2	3	4	5	1101	128.7	8.38
Q15645	Pachytene checkpoint protein 2 homolog OS=Homo sapiens GN=TRIP13 PE=1 SV=2 - [PCH2_HUMAN]	11.31	6.25	2	2	2	4	432	48.5	6.09
B2RE40	cDNA, FLJ96911, highly similar to Homo sapiens nucleosomal binding protein 1 (NSBP1), mRNA OS=Homo sapiens PE=2 SV=1 - [B2RE40_HUMAN]	11.25	20.21	7	5	5	5	282	31.5	4.59
Q4G0P3	Hydrocephalus-inducing protein homolog OS=Homo sapiens GN=HYDIN PE=1 SV=3 - [HYDIN_HUMAN]	11.25	1.35	4	5	5	5	5121	575.5	6.06
H0YCG0	Protein scribble homolog (Fragment) OS=Homo sapiens GN=SCRIB PE=1 SV=1 - [H0YCG0_HUMAN]	11.24	6.31	6	2	3	5	650	68.3	6.44
Q14669	E3 ubiquitin-protein ligase TRIP12 OS=Homo sapiens GN=TRIP12 PE=1 SV=1 - [TRIPC_HUMAN]	11.24	2.86	7	2	4	5	1992	220.3	8.48
B4DYY8	cDNA FLJ60374 OS=Homo sapiens PE=2 SV=1 - [B4DYY8_HUMAN]	11.24	8.78	1	2	2	5	148	15.6	10.93
Q8IVF2	Protein AHNAK2 OS=Homo sapiens GN=AHNAK2 PE=1 SV=2 - [AHNK2_HUMAN]	11.21	1.83	1	2	5	5	5795	616.2	5.36
P25940	Collagen alpha-3(V) chain OS=Homo sapiens GN=COL5A3 PE=1 SV=3 - [CO5A3_HUMAN]	11.19	2.92	2	3	3	4	1745	172.0	6.87
A0A0A0MRV0	Ribosome-binding protein 1 OS=Homo sapiens GN=RRBP1 PE=1 SV=1 - [A0A0A0MRV0_HUMAN]	11.19	4.75	11	5	5	5	1410	152.4	8.60
P15924	Desmoplakin OS=Homo sapiens GN=DSP PE=1 SV=3 - [DESP_HUMAN]	11.19	1.36	5	3	4	5	2871	331.6	6.81
Q99590	Protein SCAF11 OS=Homo sapiens GN=SCAF11 PE=1 SV=2 - [SCAFB_HUMAN]	11.17	3.21	9	4	4	5	1463	164.6	8.41
E7ERH2	S-phase kinase-associated protein 1 (Fragment) OS=Homo sapiens GN=SKP1 PE=1 SV=1 - [E7ERH2_HUMAN]	11.16	10.56	4	1	1	4	142	16.0	4.64
E9PL24	Myomegalin OS=Homo sapiens GN=PDE4DIP PE=1 SV=2 - [E9PL24_HUMAN]	11.16	4.39	3	2	3	5	1116	126.9	5.27
H3BLS7	Vacuolar protein sorting-associated protein 13D (Fragment) OS=Homo sapiens GN=VPS13D PE=1 SV=1 - [H3BLS7_HUMAN]	11.16	2.12	4	3	5	5	3210	356.8	6.80
B3KU98	cDNA FLJ39448 fis, clone PROST2007950, weakly similar to Myosin-10 OS=Homo sapiens PE=2 SV=1 - [B3KU98_HUMAN]	11.13	12.64	3	2	3	5	364	38.5	10.17
O00515	Ladinin-1 OS=Homo sapiens GN=LAD1 PE=1 SV=2 - [LAD1_HUMAN]	11.12	8.51	4	1	4	5	517	57.1	9.67
Q9NY15	Stabilin-1 OS=Homo sapiens GN=STAB1 PE=1 SV=3 - [STAB1_HUMAN]	11.12	3.00	2	5	5	5	2570	275.3	6.49
Q08AE8	Protein spire homolog 1 OS=Homo sapiens GN=SPIRE1 PE=1 SV=3 - [SPIR1_HUMAN]	11.12	4.89	6	3	3	5	756	85.5	8.62
Q14865	AT-rich interactive domain-containing protein 5B OS=Homo sapiens GN=ARID5B PE=1 SV=3 - [ARI5B_HUMAN]	11.11	1.09	1	1	1	5	1188	132.3	8.72
Q9ULB1	Neurexin-1 OS=Homo sapiens GN=NRXN1 PE=2 SV=1 - [NRX1A_HUMAN]	11.11	2.64	14	3	3	5	1477	161.8	5.90
B4E3Q9	cDNA FLJ59659, highly similar to Vinculin OS=Homo sapiens PE=2 SV=1 - [B4E3Q9_HUMAN]	11.11	6.36	5	2	4	5	927	100.9	5.48
B4DHC2	cDNA FLJ56434, highly similar to p130Cas-associated protein OS=Homo sapiens PE=2 SV=1 - [B4DHC2_HUMAN]	11.10	8.21	5	1	5	5	1035	111.0	9.41
Q3SXR8	VCX3A protein OS=Homo sapiens GN=VCX3A PE=2 SV=1 - [Q3SXR8_HUMAN]	11.09	21.60	18	2	3	5	125	13.0	9.82
Q5TAX3	Terminal uridylyltransferase 4 OS=Homo sapiens GN=ZCCHC11 PE=1 SV=3 - [TUT4_HUMAN]	11.08	3.47	8	4	4	5	1644	185.0	7.97
C9JW66	Synaptojanin-1 (Fragment) OS=Homo sapiens GN=SYNJ1 PE=1 SV=1 - [C9JW66_HUMAN]	11.08	4.89	8	2	2	5	695	77.5	8.87
P51589	Cytochrome P450 2J2 OS=Homo sapiens GN=CYP2J2 PE=1 SV=2 - [CP2J2_HUMAN]	11.04	7.97	2	2	3	5	502	57.6	8.60
A0A087X165	SRC kinase-signaling inhibitor 1 OS=Homo sapiens GN=SRCIN1 PE=1 SV=1 - [A0A087X165_HUMAN]	11.03	7.40	5	1	5	5	1217	130.4	9.26
Q8NEV4	Myosin-IIIa OS=Homo sapiens GN=MYO3A PE=2 SV=2 - [MYO3A_HUMAN]	11.01	1.42	1	1	2	5	1616	186.1	8.91
B4DG62	cDNA FLJ56506, highly similar to Hexokinase-1 (EC 2.7.1.1) OS=Homo sapiens PE=2 SV=1 - [B4DG62_HUMAN]	11.00	4.70	8	1	3	5	915	102.2	6.80
A0A0A0MTR7	E3 ubiquitin-protein ligase RNF213 OS=Homo sapiens GN=RNF213 PE=1 SV=1 - [A0A0A0MTR7_HUMAN]	10.98	0.54	3	1	2	5	5207	591.0	6.48
Q17RD7	Synaptotagmin-16 OS=Homo sapiens GN=SYT16 PE=1 SV=2 - [SYT16_HUMAN]	10.97	6.51	1	1	3	5	645	72.2	5.60
A5PKV2	COL4A1 protein OS=Homo sapiens GN=COL4A1 PE=2 SV=1 - [A5PKV2_HUMAN]	10.96	11.75	2	2	4	5	519	50.2	7.87
Q7Z333	Probable helicase senataxin OS=Homo sapiens GN=SETX PE=1 SV=4 - [SETX_HUMAN]	10.96	2.13	5	2	5	5	2677	302.7	7.17
G3XAL8	HCG21296, isoform CRA_a OS=Homo sapiens GN=ZGRF1 PE=1 SV=1 - [G3XAL8_HUMAN]	10.96	5.13	3	2	4	5	935	104.9	5.06
B4DLX6	cDNA FLJ54636, highly similar to Phosphatidylinositol-4,5-bisphosphate 3-kinase catalytic subunit alpha isoform (EC 2.7.1.153) OS=Homo sapiens PE=2 SV=1 - [B4DLX6_HUMAN]	10.94	1.19	5	1	1	4	837	97.3	7.53
C9J8U1	Cytospin-A (Fragment) OS=Homo sapiens GN=SPECC1L PE=4 SV=8 - [C9J8U1_HUMAN]	10.94	7.99	5	5	5	5	788	88.1	5.20
Q4ZHG4	Fibronectin type III domain-containing protein 1 OS=Homo sapiens GN=FNDC1 PE=2 SV=4 - [FNDC1_HUMAN]	10.94	3.59	2	3	5	5	1894	205.4	9.32
A0A0D9SFD0	MADS box transcription enhancer factor 2, polypeptide C (Myocyte enhancer factor 2C), isoform CRA_e OS=Homo sapiens GN=MEF2C PE=1 SV=1 - [A0A0D9SFD0_HUMAN]	10.93	8.58	13	1	2	5	431	46.9	8.98
A0A087WW06	Tetratricopeptide repeat protein 28 OS=Homo sapiens GN=TTC28 PE=1 SV=1 - [A0A087WW06_HUMAN]	10.91	3.44	2	3	5	5	2354	256.7	6.84
P27482	Calmodulin-like protein 3 OS=Homo sapiens GN=CALML3 PE=1 SV=2 - [CALL3_HUMAN]	10.91	10.07	1	1	1	5	149	16.9	4.42
B7ZKM7	UACA protein OS=Homo sapiens GN=UACA PE=2 SV=1 - [B7ZKM7_HUMAN]	10.90	4.74	9	1	5	5	1307	150.5	7.02
B3KVI8	cDNA FLJ16604 fis, clone TESTI4008097, highly similar to Polycomb group protein ASXL1 OS=Homo sapiens PE=2 SV=1 - [B3KVI8_HUMAN]	10.90	3.63	3	4	4	5	1462	157.9	5.96
O95613	Pericentrin OS=Homo sapiens GN=PCNT PE=1 SV=4 - [PCNT_HUMAN]	10.90	1.65	1	3	4	5	3336	377.8	5.55
B4DM73	cDNA FLJ60078, highly similar to CLIP-associating protein 2 (Fragment) OS=Homo sapiens PE=2 SV=1 - [B4DM73_HUMAN]	10.87	6.02	16	3	4	5	1063	115.6	9.06
Q8NET4	Retrotransposon gag domain-containing protein 1 OS=Homo sapiens GN=RGAG1 PE=1 SV=1 - [RGAG1_HUMAN]	10.87	2.95	2	3	3	4	1388	144.2	6.16
F2Z2A2	Major facilitator superfamily domain-containing protein 9 OS=Homo sapiens GN=MFSD9 PE=1 SV=1 - [F2Z2A2_HUMAN]	10.86	38.04	1	1	2	4	92	9.8	5.86
P46013	Proliferation marker protein Ki-67 OS=Homo sapiens GN=MKI67 PE=1 SV=2 - [KI67_HUMAN]	10.86	1.26	1	2	4	5	3256	358.5	9.45
F8WBW8	BAH and coiled-coil domain-containing protein 1 OS=Homo sapiens GN=BAHCC1 PE=1 SV=2 - [F8WBW8_HUMAN]	10.85	3.22	3	5	5	5	2608	276.7	8.81
Q8N7X0	Androglobin OS=Homo sapiens GN=ADGB PE=2 SV=3 - [ADGB_HUMAN]	10.85	4.50	6	1	5	5	1667	189.6	8.31
Q709C8	Vacuolar protein sorting-associated protein 13C OS=Homo sapiens GN=VPS13C PE=1 SV=1 - [VP13C_HUMAN]	10.85	0.56	2	1	2	5	3753	422.1	6.83
Q9NZR2	Low-density lipoprotein receptor-related protein 1B OS=Homo sapiens GN=LRP1B PE=1 SV=2 - [LRP1B_HUMAN]	10.84	1.20	9	3	5	5	4599	515.2	5.30
A0A172Q381	Endosialin (Fragment) OS=Homo sapiens GN=TEM1 PE=2 SV=1 - [A0A172Q381_HUMAN]	10.83	4.04	3	2	2	5	668	71.2	5.01
Q53HJ4	DNA helicase (Fragment) OS=Homo sapiens PE=2 SV=1 - [Q53HJ4_HUMAN]	10.82	7.92	9	4	5	5	808	90.9	5.71
P55072	Transitional endoplasmic reticulum ATPase OS=Homo sapiens GN=VCP PE=1 SV=4 - [TERA_HUMAN]	10.80	5.96	6	3	3	4	806	89.3	5.26
Q7Z2Y8	Interferon-induced very large GTPase 1 OS=Homo sapiens GN=GVINP1 PE=2 SV=2 - [GVIN1_HUMAN]	10.78	1.78	1	2	2	4	2422	278.9	6.55
Q8NB66	Protein unc-13 homolog C OS=Homo sapiens GN=UNC13C PE=2 SV=3 - [UN13C_HUMAN]	10.77	1.54	7	1	3	4	2214	250.8	5.92
P50570	Dynamin-2 OS=Homo sapiens GN=DNM2 PE=1 SV=2 - [DYN2_HUMAN]	10.75	5.29	14	2	4	5	870	98.0	7.44
P14384	Carboxypeptidase M OS=Homo sapiens GN=CPM PE=1 SV=2 - [CBPM_HUMAN]	10.75	12.87	3	3	3	4	443	50.5	7.36
A6PWC8	Sterile alpha motif domain-containing protein 11 (Fragment) OS=Homo sapiens GN=SAMD11 PE=4 SV=2 - [A6PWC8_HUMAN]	10.75	3.63	1	1	1	5	358	39.0	9.57
O14686	Histone-lysine N-methyltransferase 2D OS=Homo sapiens GN=KMT2D PE=1 SV=2 - [KMT2D_HUMAN]	10.72	1.41	3	4	5	5	5537	593.0	5.58
Q8NDH2	Coiled-coil domain-containing protein 168 OS=Homo sapiens GN=CCDC168 PE=2 SV=2 - [CC168_HUMAN]	10.70	2.28	1	2	4	5	2452	277.8	9.31
P49588	Alanine--tRNA ligase, cytoplasmic OS=Homo sapiens GN=AARS PE=1 SV=2 - [SYAC_HUMAN]	10.69	5.58	2	3	3	4	968	106.7	5.53
H7C2V7	Microtubule-associated serine/threonine-protein kinase 4 (Fragment) OS=Homo sapiens GN=MAST4 PE=1 SV=1 - [H7C2V7_HUMAN]	10.68	39.39	7	3	3	4	99	10.6	11.21
Q9ULV0	Unconventional myosin-Vb OS=Homo sapiens GN=MYO5B PE=1 SV=3 - [MYO5B_HUMAN]	10.64	4.82	6	4	5	5	1848	213.5	7.20
P38606	V-type proton ATPase catalytic subunit A OS=Homo sapiens GN=ATP6V1A PE=1 SV=2 - [VATA_HUMAN]	10.59	6.65	2	2	3	4	617	68.3	5.52
A0A1E1ERW3	Diaphanous homolog 1 OS=Homo sapiens GN=DIAPH1 PE=2 SV=1 - [A0A1E1ERW3_HUMAN]	10.57	5.07	13	4	4	5	1203	133.8	5.27
Q4F7X0	Brain adenylate cyclase 8 OS=Homo sapiens GN=ADCY8 PE=2 SV=1 - [Q4F7X0_HUMAN]	10.57	2.68	3	1	2	4	1120	124.8	6.79
E7EU04	Folate receptor beta (Fragment) OS=Homo sapiens GN=FOLR2 PE=1 SV=2 - [E7EU04_HUMAN]	10.55	5.71	1	1	1	4	210	24.3	7.52
B7Z5U4	Kinesin-like protein OS=Homo sapiens PE=2 SV=1 - [B7Z5U4_HUMAN]	10.54	4.95	8	2	4	4	768	86.4	6.33
A8K4A1	cDNA FLJ76790 OS=Homo sapiens PE=2 SV=1 - [A8K4A1_HUMAN]	10.49	1.25	2	1	1	4	963	108.1	6.44
P49750	YLP motif-containing protein 1 OS=Homo sapiens GN=YLPM1 PE=1 SV=3 - [YLPM1_HUMAN]	10.49	3.64	6	3	5	5	1951	219.8	6.57
B4DLP1	cDNA FLJ52560 OS=Homo sapiens PE=2 SV=1 - [B4DLP1_HUMAN]	10.48	12.39	8	2	2	3	355	38.8	5.34
J3KS77	Pyridoxine-5'-phosphate oxidase OS=Homo sapiens GN=PNPO PE=1 SV=1 - [J3KS77_HUMAN]	10.45	20.29	1	1	1	4	69	7.9	9.63
Q8WXS5	Voltage-dependent calcium channel gamma-8 subunit OS=Homo sapiens GN=CACNG8 PE=2 SV=3 - [CCG8_HUMAN]	10.45	8.47	1	2	3	4	425	43.3	9.22
A6QL64	Ankyrin repeat domain-containing protein 36A OS=Homo sapiens GN=ANKRD36 PE=2 SV=3 - [AN36A_HUMAN]	10.42	4.59	3	1	4	4	1941	217.3	8.66
Q05682	Caldesmon OS=Homo sapiens GN=CALD1 PE=1 SV=3 - [CALD1_HUMAN]	10.39	6.31	7	2	4	4	793	93.2	5.66
F6M2K3	Nuclear receptor coactivator-6 gamma OS=Homo sapiens GN=NCOA6 PE=2 SV=1 - [F6M2K3_HUMAN]	10.39	1.97	5	2	2	4	1975	209.8	9.19
V5YQU3	FGFR2-BICC1 fusion kinase protein OS=Homo sapiens GN=FGFR2-BICC1 PE=2 SV=1 - [V5YQU3_HUMAN]	10.39	3.88	31	4	4	4	1574	172.6	8.07
P13929	Beta-enolase OS=Homo sapiens GN=ENO3 PE=1 SV=5 - [ENOB_HUMAN]	10.31	10.60	12	2	3	4	434	47.0	7.71
B7ZA02	cDNA, FLJ79016, weakly similar to Mus musculus microtubule-associated protein 7 (Mtap7), mRNA OS=Homo sapiens PE=2 SV=1 - [B7ZA02_HUMAN]	10.29	8.44	9	4	4	5	687	77.0	8.73
O75037	Kinesin-like protein KIF21B OS=Homo sapiens GN=KIF21B PE=1 SV=2 - [KI21B_HUMAN]	10.28	5.07	4	3	4	4	1637	182.5	7.08
H0YA13	PR domain zinc finger protein 16 (Fragment) OS=Homo sapiens GN=PRDM16 PE=1 SV=1 - [H0YA13_HUMAN]	10.28	6.18	4	3	4	4	1084	119.4	6.64
A0A087X0X3	Heterogeneous nuclear ribonucleoprotein M OS=Homo sapiens GN=HNRNPM PE=1 SV=1 - [A0A087X0X3_HUMAN]	10.26	6.30	13	1	3	4	730	77.5	8.78
B4DWP6	cDNA FLJ56642 OS=Homo sapiens PE=2 SV=1 - [B4DWP6_HUMAN]	10.25	6.90	1	1	1	4	145	15.8	10.23
A8K5C5	cDNA FLJ77534, highly similar to Homo sapiens membrane protein, palmitoylated 5 (MAGUK p55 subfamily member 5) (MPP5), mRNA OS=Homo sapiens PE=2 SV=1 - [A8K5C5_HUMAN]	10.25	4.59	6	2	2	6	675	77.3	6.07
A0A0U1RR74	Aftiphilin (Fragment) OS=Homo sapiens GN=AFTPH PE=1 SV=1 - [A0A0U1RR74_HUMAN]	10.24	11.45	5	2	3	4	227	24.6	4.59
B4DH49	cDNA FLJ50512, highly similar to Transforming acidic coiled-coil-containing protein 1 OS=Homo sapiens PE=2 SV=1 - [B4DH49_HUMAN]	10.23	6.88	13	1	3	4	581	63.8	5.22
H0YLG5	Regulator of microtubule dynamics protein 3 (Fragment) OS=Homo sapiens GN=RMDN3 PE=1 SV=1 - [H0YLG5_HUMAN]	10.22	8.71	3	1	2	4	287	31.3	5.21
Q15652	Probable JmjC domain-containing histone demethylation protein 2C OS=Homo sapiens GN=JMJD1C PE=1 SV=2 - [JHD2C_HUMAN]	10.21	2.76	3	3	4	4	2540	284.3	7.87
Q9HBV8	Germ cell-less protein (Fragment) OS=Homo sapiens GN=GCL PE=2 SV=1 - [Q9HBV8_HUMAN]	10.20	24.29	4	4	4	4	387	44.6	5.86
A8K330	cDNA FLJ77055, highly similar to Homo sapiens WD repeat domain 75 (WDR75), mRNA (Fragment) OS=Homo sapiens PE=2 SV=1 - [A8K330_HUMAN]	10.18	1.48	2	1	1	4	812	92.2	5.82
B0I1T3	MYO7A variant protein (Fragment) OS=Homo sapiens PE=2 SV=1 - [B0I1T3_HUMAN]	10.16	1.77	6	1	2	4	1357	155.8	8.73
A0A1B0GVL4	Protein FAM193A OS=Homo sapiens GN=FAM193A PE=1 SV=1 - [A0A1B0GVL4_HUMAN]	10.14	2.51	1	1	2	4	1515	166.3	6.60
Q8IZQ1	WD repeat and FYVE domain-containing protein 3 OS=Homo sapiens GN=WDFY3 PE=1 SV=2 - [WDFY3_HUMAN]	10.12	1.11	1	3	4	4	3526	395.0	6.76
Q6AZY7	Scavenger receptor class A member 3 OS=Homo sapiens GN=SCARA3 PE=1 SV=1 - [SCAR3_HUMAN]	10.12	4.62	1	2	2	4	606	65.1	6.54
O75533	Splicing factor 3B subunit 1 OS=Homo sapiens GN=SF3B1 PE=1 SV=3 - [SF3B1_HUMAN]	10.10	4.29	5	3	3	4	1304	145.7	7.09
E9PGN7	Plasma protease C1 inhibitor OS=Homo sapiens GN=SERPING1 PE=1 SV=1 - [E9PGN7_HUMAN]	10.09	7.73	8	3	3	4	543	59.5	6.76
M0R019	Heterogeneous nuclear ribonucleoprotein M (Fragment) OS=Homo sapiens GN=HNRNPM PE=1 SV=8 - [M0R019_HUMAN]	10.05	13.92	6	1	3	4	352	37.6	9.03
P52735	Guanine nucleotide exchange factor VAV2 OS=Homo sapiens GN=VAV2 PE=1 SV=2 - [VAV2_HUMAN]	10.00	3.30	1	1	2	4	878	101.2	7.08
Q64FY1	AKNA transcript B1 (Fragment) OS=Homo sapiens GN=AKNA PE=2 SV=1 - [Q64FY1_HUMAN]	9.99	4.55	3	2	4	4	1364	146.2	6.60
Q53FL4	Adducin 3 isoform a variant (Fragment) OS=Homo sapiens PE=2 SV=1 - [Q53FL4_HUMAN]	9.99	9.00	3	4	4	4	667	74.4	6.51
F8VVB4	Uncharacterized protein OS=Homo sapiens PE=4 SV=1 - [F8VVB4_HUMAN]	9.99	15.95	2	2	4	4	439	46.5	10.46
Q4R9M8	Kinesin family member 1Bbeta isoform III OS=Homo sapiens GN=KIF1Bbeta PE=2 SV=1 - [Q4R9M8_HUMAN]	9.98	1.78	8	2	2	4	1797	201.8	5.45
Q9NVG1	cDNA FLJ10755 fis, clone NT2RP3004569, weakly similar to ANKYRIN, BRAIN VARIANT 1 OS=Homo sapiens PE=2 SV=1 - [Q9NVG1_HUMAN]	9.97	9.88	6	2	4	4	597	65.7	7.99
Q76N89	E3 ubiquitin-protein ligase HECW1 OS=Homo sapiens GN=HECW1 PE=1 SV=3 - [HECW1_HUMAN]	9.96	3.42	3	2	4	4	1606	179.4	5.50
P81605	Dermcidin OS=Homo sapiens GN=DCD PE=1 SV=2 - [DCD_HUMAN]	9.93	20.00	1	2	2	3	110	11.3	6.54
Q9NSK3	Putative uncharacterized protein DKFZp762I166 (Fragment) OS=Homo sapiens GN=DKFZp762I166 PE=2 SV=1 - [Q9NSK3_HUMAN]	9.93	18.37	2	2	2	3	283	31.4	5.15
Q6UWX4	HHIP-like protein 2 OS=Homo sapiens GN=HHIPL2 PE=1 SV=1 - [HIPL2_HUMAN]	9.92	5.25	1	1	3	4	724	80.7	9.01
Q08999	Retinoblastoma-like protein 2 OS=Homo sapiens GN=RBL2 PE=1 SV=3 - [RBL2_HUMAN]	9.91	6.15	4	1	4	4	1139	128.3	7.44
Q9P1Z9	Coiled-coil domain-containing protein 180 OS=Homo sapiens GN=CCDC180 PE=2 SV=2 - [CC180_HUMAN]	9.90	3.46	4	1	3	4	1646	191.0	6.04
B6SEH8	Endogenous retrovirus group V member 1 Env polyprotein OS=Homo sapiens GN=ERVV-1 PE=2 SV=1 - [ERVV1_HUMAN]	9.90	3.77	2	1	2	4	477	52.5	8.41
B3KUD4	cDNA FLJ39594 fis, clone SKNSH2001875, highly similar to Ribonuclease H1 (EC 3.1.26.4) OS=Homo sapiens PE=2 SV=1 - [B3KUD4_HUMAN]	9.88	14.79	1	1	2	4	169	18.8	8.60
Q8N7H6	cDNA FLJ25555 fis, clone JTH02535 OS=Homo sapiens PE=2 SV=1 - [Q8N7H6_HUMAN]	9.88	24.42	1	2	3	4	217	23.0	9.63
Q8IYA7	Homeobox protein Mohawk OS=Homo sapiens GN=MKX PE=2 SV=2 - [MKX_HUMAN]	9.87	11.65	3	2	3	4	352	39.3	9.64
Q8N4J0	Carnosine N-methyltransferase OS=Homo sapiens GN=CARNMT1 PE=1 SV=1 - [CARME_HUMAN]	9.85	11.98	4	3	3	4	409	47.2	6.32
B2RU26	Thyroglobulin OS=Homo sapiens GN=TG PE=2 SV=1 - [B2RU26_HUMAN]	9.81	2.75	5	2	4	4	2768	304.5	5.62
C9JG37	Zinc finger protein 195 (Fragment) OS=Homo sapiens GN=ZNF195 PE=4 SV=2 - [C9JG37_HUMAN]	9.80	15.97	1	1	1	4	119	13.8	5.95
A0A0U1RQC5	Neurexin-3-beta OS=Homo sapiens GN=NRXN3 PE=1 SV=1 - [A0A0U1RQC5_HUMAN]	9.78	4.15	8	3	4	4	1664	183.2	5.74
C9J167	Mismatch repair endonuclease PMS2 OS=Homo sapiens GN=PMS2 PE=1 SV=2 - [C9J167_HUMAN]	9.78	5.82	4	3	3	4	756	84.6	8.19
P78412	Iroquois-class homeodomain protein IRX-6 OS=Homo sapiens GN=IRX6 PE=2 SV=3 - [IRX6_HUMAN]	9.78	2.69	1	1	1	4	446	48.2	6.02
P01024	Complement C3 OS=Homo sapiens GN=C3 PE=1 SV=2 - [CO3_HUMAN]	9.76	1.74	2	2	2	4	1663	187.0	6.40
A0A0A0MQW8	G protein-coupled receptor 161, isoform CRA_b OS=Homo sapiens GN=GPR161 PE=1 SV=1 - [A0A0A0MQW8_HUMAN]	9.75	7.33	2	2	3	4	546	60.4	8.51
B4E2M0	cDNA FLJ55443, highly similar to Ras GTPase-activating-like protein IQGAP1 OS=Homo sapiens PE=2 SV=1 - [B4E2M0_HUMAN]	9.75	4.70	7	2	4	4	1085	124.5	8.47
Q8N8C5	cDNA FLJ39662 fis, clone SMINT2007140 OS=Homo sapiens PE=2 SV=1 - [Q8N8C5_HUMAN]	9.74	13.93	1	1	3	4	323	33.6	8.32
P27658	Collagen alpha-1(VIII) chain OS=Homo sapiens GN=COL8A1 PE=1 SV=2 - [CO8A1_HUMAN]	9.73	8.60	3	1	3	5	744	73.3	9.61
Q99456	Keratin, type I cytoskeletal 12 OS=Homo sapiens GN=KRT12 PE=1 SV=1 - [K1C12_HUMAN]	9.72	4.25	1	1	2	4	494	53.5	4.78
A0A0A0MTH9	TATA-binding protein-associated factor 172 OS=Homo sapiens GN=BTAF1 PE=1 SV=1 - [A0A0A0MTH9_HUMAN]	9.72	2.54	4	2	4	4	1849	206.8	6.52
O75402	Symplekin (Fragment) OS=Homo sapiens PE=2 SV=1 - [O75402_HUMAN]	9.71	17.56	2	2	2	4	131	14.3	4.86
A0A087WV29	RNA cytidine acetyltransferase OS=Homo sapiens GN=NAT10 PE=1 SV=1 - [A0A087WV29_HUMAN]	9.70	4.68	2	3	3	4	834	93.5	5.88
F5H724	V-set and immunoglobulin domain-containing protein 10 (Fragment) OS=Homo sapiens GN=VSIG10 PE=1 SV=8 - [F5H724_HUMAN]	9.70	7.94	3	1	1	4	189	20.4	4.84
Q15516	Tyrosine kinase OS=Homo sapiens PE=2 SV=1 - [Q15516_HUMAN]	9.70	8.67	2	1	4	4	600	67.8	9.11
B3KX43	cDNA FLJ44719 fis, clone BRACE3022303, highly similar to Homo sapiens PAX interacting (with transcription-activation domain) protein 1 (PAXIP1), mRNA OS=Homo sapiens PE=2 SV=1 - [B3KX43_HUMAN]	9.70	12.67	3	2	3	4	300	34.0	9.07
Q96JE9	Microtubule-associated protein 6 OS=Homo sapiens GN=MAP6 PE=1 SV=2 - [MAP6_HUMAN]	9.68	4.80	1	3	3	4	813	86.5	9.16
Q9H1R3	Myosin light chain kinase 2, skeletal/cardiac muscle OS=Homo sapiens GN=MYLK2 PE=1 SV=3 - [MYLK2_HUMAN]	9.67	4.53	1	1	2	4	596	64.6	7.02
B4E0W3	cDNA FLJ60386, moderately similar to Signal-induced proliferation-associated protein 1 OS=Homo sapiens PE=2 SV=1 - [B4E0W3_HUMAN]	9.67	4.36	5	3	4	4	940	101.7	6.48
Q9NSI6	Bromodomain and WD repeat-containing protein 1 OS=Homo sapiens GN=BRWD1 PE=1 SV=4 - [BRWD1_HUMAN]	9.66	2.97	8	4	4	4	2320	262.8	8.46
B4E177	cDNA FLJ56368, highly similar to Myosin-14 OS=Homo sapiens PE=2 SV=1 - [B4E177_HUMAN]	9.66	7.99	3	3	4	4	638	73.3	5.11
A0A087WX83	Myomegalin OS=Homo sapiens GN=PDE4DIP PE=1 SV=1 - [A0A087WX83_HUMAN]	9.65	1.93	5	1	3	4	2431	275.1	5.50
H0Y8X1	Succinate dehydrogenase [ubiquinone] flavoprotein subunit, mitochondrial (Fragment) OS=Homo sapiens GN=SDHA PE=1 SV=1 - [H0Y8X1_HUMAN]	9.64	24.60	5	1	2	4	126	13.6	9.99
B4DPV3	cDNA FLJ58109, highly similar to Protein diaphanous homolog 3 (Fragment) OS=Homo sapiens PE=2 SV=1 - [B4DPV3_HUMAN]	9.64	3.84	3	2	3	4	1016	116.5	6.25
A9X7H1	Eukaryotic translation elongation factor 1 alpha (Fragment) OS=Homo sapiens PE=2 SV=1 - [A9X7H1_HUMAN]	9.62	32.77	27	3	3	4	177	19.4	7.28
Q92794	Histone acetyltransferase KAT6A OS=Homo sapiens GN=KAT6A PE=1 SV=2 - [KAT6A_HUMAN]	9.61	3.19	3	3	4	4	2004	224.9	5.68
Q9UF83	Uncharacterized protein DKFZp434B061 OS=Homo sapiens PE=2 SV=2 - [YM012_HUMAN]	9.61	3.90	1	1	2	4	564	59.4	13.07
B4DEM4	cDNA FLJ56647 OS=Homo sapiens PE=2 SV=1 - [B4DEM4_HUMAN]	9.60	17.45	1	2	4	4	275	28.6	12.04
O95644	Nuclear factor of activated T-cells, cytoplasmic 1 OS=Homo sapiens GN=NFATC1 PE=1 SV=3 - [NFAC1_HUMAN]	9.59	3.71	3	1	3	4	943	101.2	6.99
Q2UY09	Collagen alpha-1(XXVIII) chain OS=Homo sapiens GN=COL28A1 PE=2 SV=2 - [COSA1_HUMAN]	9.59	4.36	1	2	3	4	1125	116.6	6.40
Q9P219	Protein Daple OS=Homo sapiens GN=CCDC88C PE=1 SV=3 - [DAPLE_HUMAN]	9.59	3.01	3	1	4	4	2028	228.1	6.23
P08572	Collagen alpha-2(IV) chain OS=Homo sapiens GN=COL4A2 PE=1 SV=4 - [CO4A2_HUMAN]	9.58	3.97	2	2	4	4	1712	167.4	8.66
I3L2J8	Centrosomal protein of 131 kDa OS=Homo sapiens GN=CEP131 PE=1 SV=1 - [I3L2J8_HUMAN]	9.58	3.92	4	1	3	4	1047	117.6	8.78
M0QXA7	Protein Wiz OS=Homo sapiens GN=WIZ PE=1 SV=1 - [M0QXA7_HUMAN]	9.57	2.58	4	2	2	4	968	103.2	9.52
A0A0U1RQV4	Rho-associated protein kinase 1 OS=Homo sapiens GN=ROCK1 PE=1 SV=1 - [A0A0U1RQV4_HUMAN]	9.57	5.19	3	2	4	4	1137	133.0	5.35
B7ZVX0	DOCK9 protein OS=Homo sapiens GN=DOCK9 PE=2 SV=1 - [B7ZVX0_HUMAN]	9.57	2.49	18	1	4	4	2046	233.7	7.40
Q86V15	Zinc finger protein castor homolog 1 OS=Homo sapiens GN=CASZ1 PE=1 SV=4 - [CASZ1_HUMAN]	9.56	2.67	3	3	3	4	1759	189.9	7.03
Q12789	General transcription factor 3C polypeptide 1 OS=Homo sapiens GN=GTF3C1 PE=1 SV=4 - [TF3C1_HUMAN]	9.56	1.80	3	2	3	4	2109	238.7	7.30
Q92667	A-kinase anchor protein 1, mitochondrial OS=Homo sapiens GN=AKAP1 PE=1 SV=1 - [AKAP1_HUMAN]	9.55	5.87	7	2	4	4	903	97.3	4.94
H0Y8J7	Eukaryotic translation initiation factor 4E (Fragment) OS=Homo sapiens GN=EIF4E PE=1 SV=1 - [H0Y8J7_HUMAN]	9.55	11.61	6	1	2	4	155	18.5	6.55
Q8N8L9	cDNA FLJ39238 fis, clone OCBBF2007946 OS=Homo sapiens PE=2 SV=1 - [Q8N8L9_HUMAN]	9.55	6.91	11	3	4	4	695	78.9	5.15
Q8TD26	Chromodomain-helicase-DNA-binding protein 6 OS=Homo sapiens GN=CHD6 PE=1 SV=4 - [CHD6_HUMAN]	9.55	2.43	3	3	4	4	2715	305.2	6.27
Q59GB4	Dihydropyrimidinase-like 2 variant (Fragment) OS=Homo sapiens PE=2 SV=1 - [Q59GB4_HUMAN]	9.54	6.53	22	1	3	4	628	68.1	6.24
P26038	Moesin OS=Homo sapiens GN=MSN PE=1 SV=3 - [MOES_HUMAN]	9.53	6.76	19	3	3	4	577	67.8	6.40
C9JW52	Insulin-like growth factor-binding protein 2 (Fragment) OS=Homo sapiens GN=IGFBP2 PE=1 SV=1 - [C9JW52_HUMAN]	9.53	20.51	1	1	1	4	78	8.7	10.20
A0A1B0GWD8	Sperm flagellar protein 2 OS=Homo sapiens GN=SPEF2 PE=1 SV=1 - [A0A1B0GWD8_HUMAN]	9.51	2.31	3	1	3	4	2169	248.9	7.15
A0A140VJI6	Testicular tissue protein Li 60 OS=Homo sapiens PE=2 SV=1 - [A0A140VJI6_HUMAN]	9.50	1.43	2	3	4	4	4265	487.2	5.83
M0QZD8	Uncharacterized protein OS=Homo sapiens GN=LOC400499 PE=1 SV=2 - [M0QZD8_HUMAN]	9.50	1.36	1	3	3	4	3231	354.0	7.88
Q86VM9	Zinc finger CCCH domain-containing protein 18 OS=Homo sapiens GN=ZC3H18 PE=1 SV=2 - [ZCH18_HUMAN]	9.50	4.41	7	3	3	4	953	106.3	8.32
Q9H4Q3	PR domain zinc finger protein 13 OS=Homo sapiens GN=PRDM13 PE=2 SV=2 - [PRD13_HUMAN]	9.49	8.49	2	3	4	4	707	73.9	8.73
O95616	PAX-9 protein (Fragment) OS=Homo sapiens GN=PAX-9 PE=2 SV=1 - [O95616_HUMAN]	9.48	13.06	1	2	2	4	268	29.0	10.55
B2R7V4	cDNA, FLJ93619, highly similar to Homo sapiens PRP4 pre-mRNA processing factor 4 homolog (yeast) (PRPF4), mRNA OS=Homo sapiens PE=2 SV=1 - [B2R7V4_HUMAN]	9.48	8.62	5	2	3	4	522	58.4	7.42
V9H0H3	Gag-Pro-Pol-Env protein OS=Homo sapiens PE=4 SV=1 - [V9H0H3_HUMAN]	9.47	2.79	58	2	4	4	2294	256.9	8.81
E7ER60	Synaptojanin-2 OS=Homo sapiens GN=SYNJ2 PE=1 SV=2 - [E7ER60_HUMAN]	9.46	1.67	1	1	1	4	839	92.2	6.79
A8K8W7	cDNA FLJ75224, highly similar to Homo sapiens lipase, hormone-sensitive (LIPE), mRNA OS=Homo sapiens PE=2 SV=1 - [A8K8W7_HUMAN]	9.46	7.16	4	3	4	4	1076	116.5	6.70
O94850	Dendrin OS=Homo sapiens GN=DDN PE=1 SV=3 - [DEND_HUMAN]	9.46	5.49	2	3	3	4	711	75.9	10.17
B4DSE0	cDNA FLJ60851, highly similar to Ephrin type-B receptor 2 (EC 2.7.10.1) OS=Homo sapiens PE=2 SV=1 - [B4DSE0_HUMAN]	9.43	6.03	6	2	4	4	928	103.4	5.58
E5RHT3	t-SNARE domain-containing protein 1 OS=Homo sapiens GN=TSNARE1 PE=1 SV=1 - [E5RHT3_HUMAN]	9.43	20.58	4	1	4	4	277	30.1	5.19
Q86YP4	Transcriptional repressor p66-alpha OS=Homo sapiens GN=GATAD2A PE=1 SV=1 - [P66A_HUMAN]	9.43	11.22	3	1	4	4	633	68.0	9.94
B2RUU3	Dedicator of cytokinesis 1 OS=Homo sapiens GN=DOCK1 PE=2 SV=1 - [B2RUU3_HUMAN]	9.42	1.23	3	2	2	4	1865	215.2	7.49
B3KX99	cDNA FLJ45019 fis, clone BRAWH3015825 OS=Homo sapiens PE=2 SV=1 - [B3KX99_HUMAN]	9.40	8.71	2	2	2	4	333	38.5	8.97
Q8IZQ8	Myocardin OS=Homo sapiens GN=MYOCD PE=1 SV=1 - [MYCD_HUMAN]	9.40	3.94	2	2	3	4	938	101.9	6.62
A0A087WWB9	Ras-related protein Rab-13 OS=Homo sapiens GN=RAB13 PE=1 SV=1 - [A0A087WWB9_HUMAN]	9.39	18.03	4	3	3	4	122	13.6	9.07
J3QKK1	Fructose-bisphosphate aldolase C (Fragment) OS=Homo sapiens GN=ALDOC PE=1 SV=1 - [J3QKK1_HUMAN]	9.38	22.13	12	2	2	4	122	13.3	7.34
Q9C0G6	Dynein heavy chain 6, axonemal OS=Homo sapiens GN=DNAH6 PE=2 SV=3 - [DYH6_HUMAN]	9.37	1.68	3	4	4	4	4158	475.7	6.00
O75648	Mitochondrial tRNA-specific 2-thiouridylase 1 OS=Homo sapiens GN=TRMU PE=1 SV=2 - [MTU1_HUMAN]	9.37	9.74	2	1	3	4	421	47.7	8.03
D3DU10	HCG1810810, isoform CRA_b OS=Homo sapiens GN=hCG_1810810 PE=4 SV=1 - [D3DU10_HUMAN]	9.36	4.20	3	1	2	4	881	98.3	7.85
O75691	Small subunit processome component 20 homolog OS=Homo sapiens GN=UTP20 PE=1 SV=3 - [UTP20_HUMAN]	9.35	1.26	2	1	3	4	2785	318.2	7.39
Q9NS42	Hypothetical zinc finger-like protein OS=Homo sapiens PE=4 SV=1 - [Q9NS42_HUMAN]	9.35	1.84	1	1	1	4	652	72.6	8.47
H0YDN9	ADP-ribosylation factor GTPase-activating protein 2 (Fragment) OS=Homo sapiens GN=ARFGAP2 PE=1 SV=1 - [H0YDN9_HUMAN]	9.35	16.03	1	2	3	4	237	25.8	5.29
Q9H6N6	Putative uncharacterized protein MYH16 OS=Homo sapiens GN=MYH16 PE=1 SV=2 - [MYH16_HUMAN]	9.35	5.10	1	1	4	5	1097	128.2	5.49
P49815	Tuberin OS=Homo sapiens GN=TSC2 PE=1 SV=2 - [TSC2_HUMAN]	9.35	3.04	16	2	4	4	1807	200.5	7.31
A0A024R3H2	Sortilin-related receptor, L(DLR class) A repeats-containing, isoform CRA_b OS=Homo sapiens GN=SORL1 PE=4 SV=1 - [A0A024R3H2_HUMAN]	9.34	2.66	10	2	4	4	2214	248.3	5.53
P41091	Eukaryotic translation initiation factor 2 subunit 3 OS=Homo sapiens GN=EIF2S3 PE=1 SV=3 - [IF2G_HUMAN]	9.34	5.30	4	2	2	3	472	51.1	8.40
L0R849	Alternative protein EDARADD OS=Homo sapiens GN=EDARADD PE=3 SV=1 - [L0R849_HUMAN]	9.34	8.51	1	1	2	3	388	42.3	5.92
P49736	DNA replication licensing factor MCM2 OS=Homo sapiens GN=MCM2 PE=1 SV=4 - [MCM2_HUMAN]	9.34	3.98	9	2	4	4	904	101.8	5.52
F8VNQ3	Teneurin-2 OS=Homo sapiens GN=TENM2 PE=1 SV=1 - [F8VNQ3_HUMAN]	9.33	2.37	5	1	4	4	2535	281.3	6.77
Q5T200	Zinc finger CCCH domain-containing protein 13 OS=Homo sapiens GN=ZC3H13 PE=1 SV=1 - [ZC3HD_HUMAN]	9.33	1.62	3	1	2	4	1668	196.5	9.42
Q7Z2D5	Phospholipid phosphatase-related protein type 4 OS=Homo sapiens GN=PLPPR4 PE=1 SV=1 - [PLPR4_HUMAN]	9.33	6.55	5	3	3	4	763	82.9	8.73
Q9BQI6	SMC5-SMC6 complex localization factor protein 1 OS=Homo sapiens GN=SLF1 PE=1 SV=2 - [SLF1_HUMAN]	9.33	4.06	2	1	3	4	1058	121.0	8.44
B2R9F7	cDNA, FLJ94367 OS=Homo sapiens PE=2 SV=1 - [B2R9F7_HUMAN]	9.33	28.40	2	2	3	4	162	18.5	9.14
B4DZE6	cDNA FLJ59077, highly similar to Golgin subfamily A member 6 OS=Homo sapiens PE=2 SV=1 - [B4DZE6_HUMAN]	9.32	17.49	6	2	3	4	263	30.3	7.94
A0A126LAW0	Glycoprotein OS=Homo sapiens GN=U22 PE=4 SV=1 - [A0A126LAW0_HUMAN]	9.32	16.83	1	2	3	4	202	23.4	8.62
A0A0A0MR62	Formin-like protein 1 OS=Homo sapiens GN=FMNL1 PE=1 SV=1 - [A0A0A0MR62_HUMAN]	9.32	2.08	3	1	1	4	626	69.4	5.38
O60293	Zinc finger C3H1 domain-containing protein OS=Homo sapiens GN=ZFC3H1 PE=1 SV=3 - [ZC3H1_HUMAN]	9.31	2.46	2	2	4	4	1989	226.2	8.13
Q01955	Collagen alpha-3(IV) chain OS=Homo sapiens GN=COL4A3 PE=1 SV=3 - [CO4A3_HUMAN]	9.31	3.41	2	2	4	4	1670	161.7	9.16
Q9P241	Probable phospholipid-transporting ATPase VD OS=Homo sapiens GN=ATP10D PE=2 SV=3 - [AT10D_HUMAN]	9.30	3.72	2	4	4	4	1426	160.2	7.15
P57060	RWD domain-containing protein 2B OS=Homo sapiens GN=RWDD2B PE=1 SV=1 - [RWD2B_HUMAN]	9.30	4.08	2	1	1	4	319	36.3	5.87
Q9NYQ6	Cadherin EGF LAG seven-pass G-type receptor 1 OS=Homo sapiens GN=CELSR1 PE=1 SV=1 - [CELR1_HUMAN]	9.28	2.26	3	2	4	4	3014	329.3	5.92
Q86TI4	WD repeat-containing protein 86 OS=Homo sapiens GN=WDR86 PE=2 SV=3 - [WDR86_HUMAN]	9.28	7.98	1	1	2	4	376	40.7	8.15
G3V2B0	MAGUK p55 subfamily member 5 OS=Homo sapiens GN=MPP5 PE=1 SV=1 - [G3V2B0_HUMAN]	9.28	9.68	5	1	1	8	124	14.3	6.39
K7EKI8	Periplakin OS=Homo sapiens GN=PPL PE=1 SV=1 - [K7EKI8_HUMAN]	9.28	1.54	4	2	2	4	1754	204.4	5.62
Q4L180	Filamin A-interacting protein 1-like OS=Homo sapiens GN=FILIP1L PE=1 SV=2 - [FIL1L_HUMAN]	9.28	5.37	2	4	4	4	1135	130.3	6.57
Q13009	T-lymphoma invasion and metastasis-inducing protein 1 OS=Homo sapiens GN=TIAM1 PE=1 SV=2 - [TIAM1_HUMAN]	9.28	3.83	3	4	4	4	1591	177.4	6.61
Q9H814	Phosphorylated adapter RNA export protein OS=Homo sapiens GN=PHAX PE=1 SV=1 - [PHAX_HUMAN]	9.27	7.61	1	2	2	4	394	44.4	5.40
O14572	WUGSC:H_248O15.1 protein (Fragment) OS=Homo sapiens GN=WUGSC:H_248O15.1 PE=4 SV=1 - [O14572_HUMAN]	9.26	1.89	5	2	3	4	1849	206.7	6.25
B8XCX8	EPC1/ASXL2b fusion protein OS=Homo sapiens PE=2 SV=1 - [B8XCX8_HUMAN]	9.26	2.65	5	2	3	4	1852	201.7	8.53
Q53HC0	Coiled-coil domain-containing protein 92 OS=Homo sapiens GN=CCDC92 PE=1 SV=2 - [CCD92_HUMAN]	9.26	3.63	1	1	1	3	331	36.9	8.90
Q496Y1	C10orf118 protein (Fragment) OS=Homo sapiens GN=C10orf118 PE=2 SV=1 - [Q496Y1_HUMAN]	9.24	4.78	4	4	4	4	1004	115.8	6.87
E7ET48	Absent in melanoma 1-like protein (Fragment) OS=Homo sapiens GN=AIM1L PE=1 SV=1 - [E7ET48_HUMAN]	9.24	15.88	2	1	4	4	466	49.2	9.91
F5GZB4	Lipoxygenase homology domain-containing protein 1 OS=Homo sapiens GN=LOXHD1 PE=1 SV=1 - [F5GZB4_HUMAN]	9.23	2.49	3	2	4	4	2211	252.4	5.43
F1T0E5	Calcium-dependent secretion activator 1 OS=Homo sapiens GN=CADPS PE=1 SV=1 - [F1T0E5_HUMAN]	9.23	4.61	6	2	4	4	1344	151.9	5.90
B7Z3I9	Delta-aminolevulinic acid dehydratase OS=Homo sapiens PE=2 SV=1 - [B7Z3I9_HUMAN]	9.22	3.51	4	1	1	4	313	34.5	7.20
A0A024RB48	Tensin like C1 domain containing phosphatase (Tensin 2), isoform CRA_a OS=Homo sapiens GN=TENC1 PE=4 SV=1 - [A0A024RB48_HUMAN]	9.21	3.35	4	3	4	4	1285	138.7	7.37
P05023	Sodium/potassium-transporting ATPase subunit alpha-1 OS=Homo sapiens GN=ATP1A1 PE=1 SV=1 - [AT1A1_HUMAN]	9.20	8.02	15	1	4	4	1023	112.8	5.49
B3KQT2	Protein disulfide-isomerase OS=Homo sapiens PE=2 SV=1 - [B3KQT2_HUMAN]	9.20	11.75	6	3	4	4	485	54.9	6.86
B1AHD1	NHP2-like protein 1 OS=Homo sapiens GN=SNU13 PE=1 SV=1 - [B1AHD1_HUMAN]	9.19	9.85	1	1	1	4	132	14.6	8.46
H0YI08	Protein MRVI1 OS=Homo sapiens GN=MRVI1 PE=1 SV=1 - [H0YI08_HUMAN]	9.18	6.70	4	1	4	4	821	89.6	6.00
Q68CM9	Putative uncharacterized protein DKFZp762B226 (Fragment) OS=Homo sapiens GN=DKFZp762B226 PE=2 SV=1 - [Q68CM9_HUMAN]	9.17	14.75	1	1	2	4	244	28.9	8.81
Q5QJ38	Trichohyalin-like protein 1 OS=Homo sapiens GN=TCHHL1 PE=2 SV=1 - [TCHL1_HUMAN]	9.17	2.88	1	1	2	4	904	99.2	4.69
Q9NYF0	Dapper homolog 1 OS=Homo sapiens GN=DACT1 PE=1 SV=2 - [DACT1_HUMAN]	9.15	7.42	5	3	4	4	836	90.1	8.69
Q9P0K7	Ankycorbin OS=Homo sapiens GN=RAI14 PE=1 SV=2 - [RAI14_HUMAN]	9.15	6.22	10	2	4	4	980	110.0	6.21
Q9HBE1	POZ-, AT hook-, and zinc finger-containing protein 1 OS=Homo sapiens GN=PATZ1 PE=1 SV=1 - [PATZ1_HUMAN]	9.15	7.71	6	2	4	4	687	74.0	8.35
A0A0D9SG23	Methyl-CpG-binding domain protein 5 OS=Homo sapiens GN=MBD5 PE=1 SV=1 - [A0A0D9SG23_HUMAN]	9.14	1.01	4	1	1	4	1086	114.7	9.26
F8WEK6	Protein eva-1 homolog C OS=Homo sapiens GN=EVA1C PE=4 SV=1 - [F8WEK6_HUMAN]	9.14	7.81	1	2	2	4	192	21.7	9.04
Q4LE33	TNC variant protein (Fragment) OS=Homo sapiens GN=TNC variant protein PE=2 SV=1 - [Q4LE33_HUMAN]	9.13	2.46	10	3	4	4	2233	244.2	4.94
X5D7J4	MAP/microtubule affinity-regulating kinase 1 isoform D (Fragment) OS=Homo sapiens GN=MARK1 PE=2 SV=1 - [X5D7J4_HUMAN]	9.13	10.25	8	3	4	4	595	66.0	9.61
Q13472	DNA topoisomerase 3-alpha OS=Homo sapiens GN=TOP3A PE=1 SV=1 - [TOP3A_HUMAN]	9.13	4.80	5	3	3	4	1001	112.3	8.34
Q9UPU5	Ubiquitin carboxyl-terminal hydrolase 24 OS=Homo sapiens GN=USP24 PE=1 SV=3 - [UBP24_HUMAN]	9.12	2.06	2	3	4	4	2620	294.2	6.14
E9PK06	Elongation factor 1-delta (Fragment) OS=Homo sapiens GN=EEF1D PE=1 SV=8 - [E9PK06_HUMAN]	9.12	34.53	16	2	2	4	139	15.2	5.57
A4UCT1	Glyceraldehyde 3-phosphate dehydrogenase (Fragment) OS=Homo sapiens PE=2 SV=1 - [A4UCT1_HUMAN]	9.12	17.47	6	2	2	3	166	17.3	8.60
A0A087WUT0	Myelin expression factor 2 OS=Homo sapiens GN=MYEF2 PE=1 SV=1 - [A0A087WUT0_HUMAN]	9.12	8.04	9	2	3	4	547	58.6	9.22
Q8IVF2	Protein AHNAK2 OS=Homo sapiens GN=AHNAK2 PE=1 SV=2 - [AHNK2_HUMAN]	9.10	1.74	1	3	4	4	5795	616.2	5.36
Q96M91	Cilia- and flagella-associated protein 53 OS=Homo sapiens GN=CFAP53 PE=1 SV=2 - [CFA53_HUMAN]	9.10	6.61	1	1	3	4	514	61.8	8.90
L8E9U6	Alternative protein LONRF2 OS=Homo sapiens GN=LONRF2 PE=4 SV=1 - [L8E9U6_HUMAN]	9.09	26.67	1	1	1	4	45	5.2	12.18
Q9BUK0	Coiled-coil-helix-coiled-coil-helix domain-containing protein 7 OS=Homo sapiens GN=CHCHD7 PE=1 SV=1 - [CHCH7_HUMAN]	9.09	17.65	2	1	2	4	85	10.1	8.82
Q9BRU9	rRNA-processing protein UTP23 homolog OS=Homo sapiens GN=UTP23 PE=1 SV=2 - [UTP23_HUMAN]	9.09	14.86	1	1	3	4	249	28.4	10.07
Q86UP3	Zinc finger homeobox protein 4 OS=Homo sapiens GN=ZFHX4 PE=1 SV=1 - [ZFHX4_HUMAN]	9.09	1.60	4	3	4	4	3567	393.5	6.37
A6NHR9	Structural maintenance of chromosomes flexible hinge domain-containing protein 1 OS=Homo sapiens GN=SMCHD1 PE=1 SV=2 - [SMHD1_HUMAN]	9.09	1.60	1	2	2	4	2005	226.2	7.30
B3KRV9	cDNA FLJ34971 fis, clone NTONG2005373, highly similar to Ubiquitin carboxyl-terminal hydrolase 47 (EC 3.1.2.15) OS=Homo sapiens PE=2 SV=1 - [B3KRV9_HUMAN]	9.08	9.89	2	1	4	4	526	59.6	4.84
A0A0J9YWL9	Putative testis-expressed protein 13C OS=Homo sapiens GN=TEX13C PE=5 SV=1 - [TX13C_HUMAN]	9.08	12.19	1	2	3	4	993	109.7	8.79
B3KW05	cDNA FLJ41838 fis, clone NT2RI3001515, highly similar to G-protein coupled receptor-associated sorting protein 2 OS=Homo sapiens PE=2 SV=1 - [B3KW05_HUMAN]	9.07	5.85	2	3	3	4	838	93.7	5.05
Q5IBP5	AKAP9-BRAF fusion protein OS=Homo sapiens PE=2 SV=1 - [Q5IBP5_HUMAN]	9.07	2.48	8	1	3	4	1492	172.1	5.34
B4DGC6	cDNA FLJ58177, highly similar to Transmembrane protein 94 OS=Homo sapiens PE=2 SV=1 - [B4DGC6_HUMAN]	9.07	3.73	7	3	3	4	1366	152.1	6.44
L8E990	Alternative protein LPAR2 OS=Homo sapiens GN=LPAR2 PE=4 SV=1 - [L8E990_HUMAN]	9.07	21.82	1	1	1	4	55	5.7	8.40
Q14140	SERTA domain-containing protein 2 OS=Homo sapiens GN=SERTAD2 PE=1 SV=1 - [SRTD2_HUMAN]	9.06	3.82	1	1	1	4	314	33.9	4.59
A0A0A0MRY2	Zinc finger MYND domain-containing protein 11 OS=Homo sapiens GN=ZMYND11 PE=1 SV=1 - [A0A0A0MRY2_HUMAN]	9.06	5.60	13	3	3	4	482	56.5	8.91
Q9NYQ8	Protocadherin Fat 2 OS=Homo sapiens GN=FAT2 PE=1 SV=2 - [FAT2_HUMAN]	9.06	0.80	5	1	2	4	4349	479.0	5.16
Q68D03	Putative uncharacterized protein DKFZp686K03100 OS=Homo sapiens GN=DKFZp686K03100 PE=2 SV=1 - [Q68D03_HUMAN]	9.05	3.43	6	1	2	4	758	85.9	6.49
Q5M9N0	Coiled-coil domain-containing protein 158 OS=Homo sapiens GN=CCDC158 PE=2 SV=2 - [CD158_HUMAN]	9.05	4.31	1	2	4	4	1113	127.1	6.46
B7Z7U8	cDNA FLJ56320, highly similar to 6-phosphofructo-2-kinase/fructose-2,6-biphosphatase 3 OS=Homo sapiens PE=2 SV=1 - [B7Z7U8_HUMAN]	9.05	11.34	10	1	3	4	344	38.5	9.70
Q96RY5	Protein cramped-like OS=Homo sapiens GN=CRAMP1 PE=1 SV=3 - [CRML_HUMAN]	9.05	2.60	1	1	2	4	1269	134.6	7.87
Q96MN5	Transcription elongation factor A N-terminal and central domain-containing protein 2 OS=Homo sapiens GN=TCEANC2 PE=1 SV=1 - [TEAN2_HUMAN]	9.05	5.77	2	1	1	4	208	24.1	10.05
O75592	E3 ubiquitin-protein ligase MYCBP2 OS=Homo sapiens GN=MYCBP2 PE=1 SV=3 - [MYCB2_HUMAN]	9.04	1.19	4	2	4	4	4640	509.8	7.03
B4DH29	DNA-directed RNA polymerase subunit beta OS=Homo sapiens PE=2 SV=1 - [B4DH29_HUMAN]	9.03	5.37	6	3	4	4	1099	125.1	8.29
A0A024R8L8	Envoplakin, isoform CRA_a OS=Homo sapiens GN=EVPL PE=4 SV=1 - [A0A024R8L8_HUMAN]	9.03	2.31	5	3	4	4	2033	231.5	7.02
Q8NFU5	Inositol polyphosphate multikinase OS=Homo sapiens GN=IPMK PE=1 SV=1 - [IPMK_HUMAN]	9.02	9.13	2	3	3	4	416	47.2	7.64
B4DDT1	cDNA FLJ50111, highly similar to Hepatic triacylglycerol lipase (EC 3.1.1.3) OS=Homo sapiens PE=2 SV=1 - [B4DDT1_HUMAN]	9.02	3.42	6	2	2	4	438	48.9	9.13
J3KPF0	Probable E3 ubiquitin-protein ligase HECTD4 OS=Homo sapiens GN=HECTD4 PE=1 SV=3 - [J3KPF0_HUMAN]	9.02	1.29	4	1	4	4	4416	484.0	6.02
A0A024R0V9	Kinesin family member 21A, isoform CRA_c OS=Homo sapiens GN=KIF21A PE=3 SV=1 - [A0A024R0V9_HUMAN]	9.02	2.83	5	1	3	4	1307	147.1	6.29
D6RF76	Coiled-coil domain-containing protein 112 OS=Homo sapiens GN=CCDC112 PE=1 SV=1 - [D6RF76_HUMAN]	9.02	4.59	2	1	2	4	414	49.6	9.41
A6NKC6	Retinitis pigmentosa 1-like 1 protein OS=Homo sapiens GN=RP1L1 PE=1 SV=2 - [A6NKC6_HUMAN]	9.02	2.00	2	2	3	4	2400	252.1	4.45
C9JGI3	Thymidine phosphorylase (Fragment) OS=Homo sapiens GN=TYMP PE=1 SV=1 - [C9JGI3_HUMAN]	9.01	5.39	3	2	2	4	445	46.1	5.52
E9PMV1	Plectin (Fragment) OS=Homo sapiens GN=PLEC PE=1 SV=1 - [E9PMV1_HUMAN]	9.01	7.11	2	1	4	4	703	80.7	6.77
Q96PX9	Pleckstrin homology domain-containing family G member 4B OS=Homo sapiens GN=PLEKHG4B PE=1 SV=4 - [PKH4B_HUMAN]	9.01	4.88	3	3	4	4	1271	139.6	6.79
Q8NB66	Protein unc-13 homolog C OS=Homo sapiens GN=UNC13C PE=2 SV=3 - [UN13C_HUMAN]	9.00	2.03	11	1	4	4	2214	250.8	5.92
A0A0D9SGA5	Solute carrier family 12 member 5 (Fragment) OS=Homo sapiens GN=SLC12A5 PE=4 SV=1 - [A0A0D9SGA5_HUMAN]	9.00	49.25	2	1	3	4	67	6.1	10.70
Q9P2Q2	FERM domain-containing protein 4A OS=Homo sapiens GN=FRMD4A PE=1 SV=3 - [FRM4A_HUMAN]	9.00	4.81	1	2	3	4	1039	115.4	8.87
A0A0D9SG19	Regulating synaptic membrane exocytosis protein 2 OS=Homo sapiens GN=RIMS2 PE=1 SV=1 - [A0A0D9SG19_HUMAN]	9.00	4.62	9	3	4	4	1060	121.5	9.19
F2Z2E2	Ras GTPase-activating-like protein IQGAP3 OS=Homo sapiens GN=IQGAP3 PE=1 SV=1 - [F2Z2E2_HUMAN]	8.99	3.97	3	2	4	4	1588	179.4	7.66
O15020	Spectrin beta chain, non-erythrocytic 2 OS=Homo sapiens GN=SPTBN2 PE=1 SV=3 - [SPTN2_HUMAN]	8.99	2.43	2	2	4	4	2390	271.2	6.11
B0FLL2	6-phosphofructo-2-kinase/fructose-2, 6-bisphosphatase 2 transcript variant 3 OS=Homo sapiens GN=PFKFB2 PE=2 SV=1 - [B0FLL2_HUMAN]	8.99	6.99	7	1	3	4	472	54.7	8.32
Q86V37	TAOK2 protein (Fragment) OS=Homo sapiens GN=TAOK2 PE=2 SV=1 - [Q86V37_HUMAN]	8.99	2.95	2	2	3	4	1426	158.9	8.47
Q6ZUY4	cDNA FLJ43210 fis, clone FEBRA2020582 OS=Homo sapiens PE=2 SV=1 - [Q6ZUY4_HUMAN]	8.98	9.59	1	1	1	4	146	15.5	12.21
B4DKZ7	cDNA FLJ55704, highly similar to Transcriptional repressor p66 alpha OS=Homo sapiens PE=2 SV=1 - [B4DKZ7_HUMAN]	8.98	13.30	1	1	4	4	436	46.8	10.24
E7ESC7	Macrophage erythroblast attacher OS=Homo sapiens GN=MAEA PE=1 SV=1 - [E7ESC7_HUMAN]	8.96	11.75	16	3	3	4	434	49.4	8.98
Q5RHP9	Glutamate-rich protein 3 OS=Homo sapiens GN=ERICH3 PE=2 SV=1 - [ERIC3_HUMAN]	8.96	2.81	1	2	3	4	1530	168.4	4.88
D3DSU3	Kinesin family member 13B, isoform CRA_a OS=Homo sapiens GN=KIF13B PE=3 SV=1 - [D3DSU3_HUMAN]	8.95	3.52	4	1	4	4	1562	174.7	5.91
Q96JX3	Protein SERAC1 OS=Homo sapiens GN=SERAC1 PE=1 SV=1 - [SRAC1_HUMAN]	8.94	5.66	2	2	3	4	654	74.1	7.68
Q9H799	Protein JBTS17 OS=Homo sapiens GN=C5orf42 PE=1 SV=4 - [CE042_HUMAN]	8.94	1.25	3	1	4	4	3197	361.5	6.99
Q9UF55	Putative uncharacterized protein DKFZp434A2017 (Fragment) OS=Homo sapiens GN=DKFZp434A2017 PE=2 SV=1 - [Q9UF55_HUMAN]	8.93	1.01	2	1	1	4	990	115.9	7.47
E9PP00	Probable ribonuclease ZC3H12C OS=Homo sapiens GN=ZC3H12C PE=1 SV=1 - [E9PP00_HUMAN]	8.93	2.93	2	2	2	4	852	95.8	6.87
P51587	Breast cancer type 2 susceptibility protein OS=Homo sapiens GN=BRCA2 PE=1 SV=3 - [BRCA2_HUMAN]	8.93	1.29	3	2	4	4	3418	384.0	6.71
F5H522	Voltage-dependent L-type calcium channel subunit alpha OS=Homo sapiens GN=CACNA1C PE=1 SV=1 - [F5H522_HUMAN]	8.93	2.82	8	1	4	4	2163	242.3	7.01
D3DWB6	Ubiquitin specific peptidase 9, X-linked, isoform CRA_b OS=Homo sapiens GN=USP9X PE=3 SV=1 - [D3DWB6_HUMAN]	8.92	1.89	4	2	3	4	2379	271.1	5.97
E7EP17	Dynein heavy chain 9, axonemal OS=Homo sapiens GN=DNAH9 PE=1 SV=1 - [E7EP17_HUMAN]	8.92	1.29	9	2	4	4	4410	503.0	5.90
Q6IQ55	Tau-tubulin kinase 2 OS=Homo sapiens GN=TTBK2 PE=1 SV=2 - [TTBK2_HUMAN]	8.91	3.70	3	1	3	4	1244	137.3	7.01
H0YD13	CD44 antigen OS=Homo sapiens GN=CD44 PE=1 SV=2 - [H0YD13_HUMAN]	8.91	13.59	13	2	2	3	206	22.7	8.19
A0A087X0S7	Leucine-rich repeat-containing protein 41 OS=Homo sapiens GN=LRRC41 PE=1 SV=1 - [A0A087X0S7_HUMAN]	8.91	8.06	8	2	3	4	521	56.4	8.73
A0A140VKE5	Sulfhydryl oxidase OS=Homo sapiens GN=QSCN6 PE=2 SV=1 - [A0A140VKE5_HUMAN]	8.91	9.11	5	3	4	4	604	66.8	8.56
Q8IZD9	Dedicator of cytokinesis protein 3 OS=Homo sapiens GN=DOCK3 PE=1 SV=1 - [DOCK3_HUMAN]	8.91	2.61	2	2	4	4	2030	233.0	6.98
B7Z2X4	cDNA FLJ53327, highly similar to Gelsolin OS=Homo sapiens PE=2 SV=1 - [B7Z2X4_HUMAN]	8.91	6.10	9	2	2	3	705	77.7	5.69
H0YKU1	Tropomodulin-3 (Fragment) OS=Homo sapiens GN=TMOD3 PE=1 SV=1 - [H0YKU1_HUMAN]	8.90	7.49	4	1	1	4	187	20.9	7.43
A6NMZ7	Collagen alpha-6(VI) chain OS=Homo sapiens GN=COL6A6 PE=1 SV=2 - [CO6A6_HUMAN]	8.90	2.34	1	2	4	4	2263	247.0	6.89
A0A140T8Z8	Tenascin-X (Fragment) OS=Homo sapiens GN=TNXB PE=1 SV=1 - [A0A140T8Z8_HUMAN]	8.90	0.91	4	3	4	4	3296	358.4	5.14
Q9BQS8	FYVE and coiled-coil domain-containing protein 1 OS=Homo sapiens GN=FYCO1 PE=1 SV=3 - [FYCO1_HUMAN]	8.89	2.91	1	3	4	4	1478	166.9	4.92
B1ALM3	Voltage-dependent L-type calcium channel subunit alpha OS=Homo sapiens GN=CACNA1S PE=1 SV=1 - [B1ALM3_HUMAN]	8.89	2.05	3	3	3	4	1854	210.5	6.57
A0A087WU89	Uncharacterized protein C11orf95 (Fragment) OS=Homo sapiens GN=C11orf95 PE=4 SV=1 - [A0A087WU89_HUMAN]	8.89	10.51	2	1	3	4	276	29.8	5.99
A8MSZ8	Obscurin-like protein 1 OS=Homo sapiens GN=OBSL1 PE=1 SV=1 - [A8MSZ8_HUMAN]	8.88	4.41	4	4	4	4	612	68.1	5.24
B4E0D8	cDNA FLJ61510, highly similar to Kinetochore-associated protein 1 OS=Homo sapiens PE=2 SV=1 - [B4E0D8_HUMAN]	8.88	4.85	3	2	4	4	1134	129.2	5.81
B4DY72	cDNA FLJ52360, highly similar to Heat-shock protein 105 kDa OS=Homo sapiens PE=2 SV=1 - [B4DY72_HUMAN]	8.88	3.99	6	2	2	3	677	77.1	5.10
A0A0A0MTP3	M-phase phosphoprotein 9 OS=Homo sapiens GN=MPHOSPH9 PE=1 SV=1 - [A0A0A0MTP3_HUMAN]	8.88	4.94	8	2	4	4	1153	129.2	6.25
A0A1P0AZG4	Ligand-dependent corepressor OS=Homo sapiens GN=LCOR PE=4 SV=1 - [A0A1P0AZG4_HUMAN]	8.87	3.53	3	1	3	4	1247	137.1	8.24
Q96FI4	Endonuclease 8-like 1 OS=Homo sapiens GN=NEIL1 PE=1 SV=3 - [NEIL1_HUMAN]	8.87	5.38	9	1	2	4	390	43.7	9.92
Q7Z2K8	G protein-regulated inducer of neurite outgrowth 1 OS=Homo sapiens GN=GPRIN1 PE=1 SV=2 - [GRIN1_HUMAN]	8.86	3.17	1	2	2	4	1008	102.3	8.06
J3QSD7	Cyclin-dependent kinase 12 (Fragment) OS=Homo sapiens GN=CDK12 PE=1 SV=1 - [J3QSD7_HUMAN]	8.86	5.08	2	4	4	4	1201	133.6	9.57
Q4G0Z0	LOC100170229 protein (Fragment) OS=Homo sapiens GN=LOC100170229 PE=2 SV=1 - [Q4G0Z0_HUMAN]	8.85	6.47	2	2	3	4	603	66.5	12.15
A0A126LAZ3	U50 OS=Homo sapiens GN=U50 PE=4 SV=1 - [A0A126LAZ3_HUMAN]	8.84	1.80	1	1	1	4	555	63.6	6.38
A2A369	Dedicator of cytokinesis protein 8 OS=Homo sapiens GN=DOCK8 PE=1 SV=1 - [A2A369_HUMAN]	8.83	3.70	5	3	4	4	1566	177.9	7.21
B4DT15	cDNA FLJ56150, highly similar to Zinc phosphodiesterase ELAC protein 2 (EC 3.1.26.11) OS=Homo sapiens PE=2 SV=1 - [B4DT15_HUMAN]	8.83	6.04	9	3	3	4	811	90.5	7.74
A0A0A0MR67	Voltage-dependent L-type calcium channel subunit alpha OS=Homo sapiens GN=CACNA1C PE=1 SV=1 - [A0A0A0MR67_HUMAN]	8.83	2.62	8	1	4	4	2173	243.3	6.96
E7EMW7	E3 ubiquitin-protein ligase UBR5 OS=Homo sapiens GN=UBR5 PE=1 SV=1 - [E7EMW7_HUMAN]	8.82	1.65	4	2	3	4	2792	308.4	5.85
B4DE60	Receptor expression-enhancing protein OS=Homo sapiens GN=REEP2 PE=1 SV=1 - [B4DE60_HUMAN]	8.82	19.63	7	2	3	4	214	23.8	9.26
Q96K76	Ubiquitin carboxyl-terminal hydrolase 47 OS=Homo sapiens GN=USP47 PE=1 SV=3 - [UBP47_HUMAN]	8.81	3.85	2	1	4	4	1375	157.2	5.08
O75128	Protein cordon-bleu OS=Homo sapiens GN=COBL PE=1 SV=2 - [COBL_HUMAN]	8.81	3.65	5	2	3	4	1261	135.5	7.75
Q2TBE0	CWF19-like protein 2 OS=Homo sapiens GN=CWF19L2 PE=1 SV=4 - [C19L2_HUMAN]	8.81	5.15	4	2	3	4	894	103.7	8.65
E7EUL0	Polypeptide N-acetylgalactosaminyltransferase 3 OS=Homo sapiens GN=GALNT3 PE=1 SV=1 - [E7EUL0_HUMAN]	8.80	2.70	4	1	1	4	371	42.5	6.73
Q9ULU4	Protein kinase C-binding protein 1 OS=Homo sapiens GN=ZMYND8 PE=1 SV=2 - [PKCB1_HUMAN]	8.79	3.79	1	1	2	3	1186	131.6	7.20
Q6PGP7	Tetratricopeptide repeat protein 37 OS=Homo sapiens GN=TTC37 PE=1 SV=1 - [TTC37_HUMAN]	8.79	3.77	2	4	4	4	1564	175.4	7.53
Q8TBY9	WD repeat-containing protein 66 OS=Homo sapiens GN=WDR66 PE=2 SV=2 - [WDR66_HUMAN]	8.79	2.00	2	1	2	4	1149	129.9	5.08
L0R823	Alternative protein BDH2 OS=Homo sapiens GN=BDH2 PE=4 SV=1 - [L0R823_HUMAN]	8.78	22.22	1	1	1	4	63	7.5	12.23
Q9P2P1	Protein NYNRIN OS=Homo sapiens GN=NYNRIN PE=2 SV=3 - [NYNRI_HUMAN]	8.78	2.42	1	3	3	4	1898	208.2	8.02
Q8NDT2	Putative RNA-binding protein 15B OS=Homo sapiens GN=RBM15B PE=1 SV=3 - [RB15B_HUMAN]	8.77	5.73	1	3	4	4	890	97.1	9.85
Q14689	Disco-interacting protein 2 homolog A OS=Homo sapiens GN=DIP2A PE=1 SV=2 - [DIP2A_HUMAN]	8.77	3.88	3	1	4	4	1571	170.3	8.03
Q5VV23	Chromosome 10 open reading frame 63, isoform CRA_b OS=Homo sapiens GN=ENKUR PE=1 SV=1 - [Q5VV23_HUMAN]	8.76	12.55	2	1	3	4	255	29.4	9.35
E7EW05	Protein SDA1 homolog OS=Homo sapiens GN=SDAD1 PE=1 SV=1 - [E7EW05_HUMAN]	8.76	7.54	3	1	4	4	650	75.4	9.17
Q8NCI6	Beta-galactosidase-1-like protein 3 OS=Homo sapiens GN=GLB1L3 PE=2 SV=3 - [GLBL3_HUMAN]	8.76	3.98	1	1	2	4	653	74.8	8.95
Q9Y5T4	DnaJ homolog subfamily C member 15 OS=Homo sapiens GN=DNAJC15 PE=1 SV=2 - [DJC15_HUMAN]	8.75	14.00	1	1	2	4	150	16.4	10.08
A0A087WYF1	Laminin subunit alpha-2 OS=Homo sapiens GN=LAMA2 PE=1 SV=1 - [A0A087WYF1_HUMAN]	8.74	1.70	4	1	4	4	3118	343.2	6.37
Q7Z7M0	Multiple epidermal growth factor-like domains protein 8 OS=Homo sapiens GN=MEGF8 PE=1 SV=2 - [MEGF8_HUMAN]	8.74	2.88	3	2	4	4	2845	302.9	6.87
B3KQY4	cDNA FLJ33295 fis, clone BNGH42000815, highly similar to Mitogen-activated protein kinase kinase kinase 11 OS=Homo sapiens PE=2 SV=1 - [B3KQY4_HUMAN]	8.74	9.82	3	2	2	4	336	36.1	9.96
Q92974	Rho guanine nucleotide exchange factor 2 OS=Homo sapiens GN=ARHGEF2 PE=1 SV=4 - [ARHG2_HUMAN]	8.74	5.78	10	1	4	4	986	111.5	7.27
B4DUD5	cDNA FLJ58787, highly similar to Cleavage stimulation factor 64 kDa subunit OS=Homo sapiens PE=2 SV=1 - [B4DUD5_HUMAN]	8.74	3.62	4	1	1	4	553	58.6	6.76
O95425	Supervillin OS=Homo sapiens GN=SVIL PE=1 SV=2 - [SVIL_HUMAN]	8.73	3.12	1	2	4	4	2214	247.6	6.98
A0A0A0MRY4	Uncharacterized protein OS=Homo sapiens PE=4 SV=1 - [A0A0A0MRY4_HUMAN]	8.73	2.35	1	2	2	3	1105	121.9	7.36
B3KXX7	cDNA FLJ46277 fis, clone TESTI4029731 OS=Homo sapiens PE=2 SV=1 - [B3KXX7_HUMAN]	8.72	2.93	3	1	1	4	614	66.4	4.91
Q9C0D6	FH2 domain-containing protein 1 OS=Homo sapiens GN=FHDC1 PE=1 SV=2 - [FHDC1_HUMAN]	8.70	3.94	1	2	3	4	1143	124.7	9.03
A0A126LB22	U95 OS=Homo sapiens GN=U95 PE=4 SV=1 - [A0A126LB22_HUMAN]	8.70	3.93	1	3	4	4	1119	123.8	5.57
E9PGF6	Pleckstrin homology-like domain family B member 2 OS=Homo sapiens GN=PHLDB2 PE=1 SV=1 - [E9PGF6_HUMAN]	8.70	3.09	6	2	2	4	744	86.6	6.18
Q70CQ2	Ubiquitin carboxyl-terminal hydrolase 34 OS=Homo sapiens GN=USP34 PE=1 SV=2 - [UBP34_HUMAN]	8.69	1.58	3	4	4	4	3546	404.0	5.82
A7YQ73	Peptidylprolyl isomerase (Fragment) OS=Homo sapiens GN=FKBP9 PE=2 SV=1 - [A7YQ73_HUMAN]	8.69	21.09	10	2	2	4	147	16.1	4.44
B7Z5M1	cDNA FLJ50625, highly similar to Importin beta-1 subunit OS=Homo sapiens PE=2 SV=1 - [B7Z5M1_HUMAN]	8.68	6.97	7	3	3	3	660	73.3	4.78
B7ZMH4	ODZ1 protein OS=Homo sapiens GN=ODZ1 PE=2 SV=1 - [B7ZMH4_HUMAN]	8.67	1.76	3	2	4	4	2731	305.7	6.47
H0Y6I0	Golgin subfamily A member 4 (Fragment) OS=Homo sapiens GN=GOLGA4 PE=1 SV=1 - [H0Y6I0_HUMAN]	8.67	2.81	5	2	3	4	2099	246.5	5.39
J3QSC9	Puratrophin-1 (Fragment) OS=Homo sapiens GN=PLEKHG4 PE=1 SV=1 - [J3QSC9_HUMAN]	8.66	13.60	3	2	3	5	125	13.4	4.78
A6NH11	Glycolipid transfer protein domain-containing protein 2 OS=Homo sapiens GN=GLTPD2 PE=1 SV=2 - [GLTD2_HUMAN]	8.65	9.28	1	1	2	3	291	31.6	10.15
B3XZL9	Tyrosine-protein kinase receptor OS=Homo sapiens PE=2 SV=1 - [B3XZL9_HUMAN]	8.64	7.39	36	2	3	3	785	86.3	8.59
Q8N1A0	Keratin-like protein KRT222 OS=Homo sapiens GN=KRT222 PE=2 SV=1 - [KT222_HUMAN]	8.64	7.46	1	1	2	3	295	34.1	5.87
A0A024R0V9	Kinesin family member 21A, isoform CRA_c OS=Homo sapiens GN=KIF21A PE=3 SV=1 - [A0A024R0V9_HUMAN]	8.62	1.61	6	1	2	4	1307	147.1	6.29
Q71MF7	Putative uncharacterized protein FP972 OS=Homo sapiens GN=FP972 PE=2 SV=1 - [Q71MF7_HUMAN]	8.61	2.02	4	1	1	4	545	60.7	10.04
B4DYH7	cDNA FLJ58306, highly similar to Homo sapiens nischarin (NISCH), mRNA OS=Homo sapiens PE=2 SV=1 - [B4DYH7_HUMAN]	8.61	2.79	6	2	2	4	1113	123.0	4.96
B7Z7S9	cDNA FLJ61724, highly similar to Shugoshin-like 2 OS=Homo sapiens PE=2 SV=1 - [B7Z7S9_HUMAN]	8.61	2.38	2	1	2	4	1260	143.9	7.59
A0A087WYS3	Protein kinase C-binding protein 1 OS=Homo sapiens GN=ZMYND8 PE=1 SV=1 - [A0A087WYS3_HUMAN]	8.60	3.77	3	1	2	3	1087	121.2	6.60
Q8IWJ2	GRIP and coiled-coil domain-containing protein 2 OS=Homo sapiens GN=GCC2 PE=1 SV=4 - [GCC2_HUMAN]	8.60	3.38	7	2	4	4	1684	195.8	5.14
Q9NWC0	cDNA FLJ10141 fis, clone HEMBA1003199 OS=Homo sapiens PE=2 SV=1 - [Q9NWC0_HUMAN]	8.59	9.94	1	1	1	4	161	17.4	11.63
Q9NUC0	SERTA domain-containing protein 4 OS=Homo sapiens GN=SERTAD4 PE=2 SV=1 - [SRTD4_HUMAN]	8.58	2.81	1	1	1	4	356	39.3	6.71
Q6ZTR5	Cilia- and flagella-associated protein 47 OS=Homo sapiens GN=CFAP47 PE=2 SV=4 - [CFA47_HUMAN]	8.58	1.87	2	2	4	4	3102	351.7	7.40
Q86TB3	Alpha-protein kinase 2 OS=Homo sapiens GN=ALPK2 PE=2 SV=3 - [ALPK2_HUMAN]	8.58	2.40	1	2	4	4	2170	236.9	5.24
Q14028	Cyclic nucleotide-gated cation channel beta-1 OS=Homo sapiens GN=CNGB1 PE=1 SV=2 - [CNGB1_HUMAN]	8.58	3.12	1	2	3	4	1251	139.6	4.81
A0A024RD60	F-box protein 9, isoform CRA_b OS=Homo sapiens GN=FBXO9 PE=4 SV=1 - [A0A024RD60_HUMAN]	8.57	5.37	4	1	1	4	205	24.3	5.66
Q5VYK3	Proteasome-associated protein ECM29 homolog OS=Homo sapiens GN=ECM29 PE=1 SV=2 - [ECM29_HUMAN]	8.57	3.47	4	4	4	4	1845	204.2	7.12
F8VZY6	Cyclin-dependent kinase 17 (Fragment) OS=Homo sapiens GN=CDK17 PE=1 SV=1 - [F8VZY6_HUMAN]	8.57	6.21	5	1	2	4	161	18.0	9.33
Q13753	Laminin subunit gamma-2 OS=Homo sapiens GN=LAMC2 PE=1 SV=2 - [LAMC2_HUMAN]	8.57	5.36	1	1	4	4	1193	130.9	6.19
Q7Z408	CUB and sushi domain-containing protein 2 OS=Homo sapiens GN=CSMD2 PE=1 SV=2 - [CSMD2_HUMAN]	8.56	1.00	3	3	3	4	3487	379.8	6.09
A8K9U9	cDNA FLJ75862, highly similar to Homo sapiens tripartite motif-containing 23 (TRIM23), transcript variant alpha, mRNA OS=Homo sapiens PE=2 SV=1 - [A8K9U9_HUMAN]	8.56	7.49	5	2	3	4	574	64.0	6.43
A0A087X1N7	Nebulin OS=Homo sapiens GN=NEB PE=1 SV=1 - [A0A087X1N7_HUMAN]	8.53	1.12	6	2	4	4	8560	990.2	9.01
Q9UG63	ATP-binding cassette sub-family F member 2 OS=Homo sapiens GN=ABCF2 PE=1 SV=2 - [ABCF2_HUMAN]	8.51	1.61	2	1	1	3	623	71.2	7.37
Q68DQ2	Very large A-kinase anchor protein OS=Homo sapiens GN=CRYBG3 PE=1 SV=3 - [CRBG3_HUMAN]	8.50	1.25	2	3	3	4	2970	330.4	5.20
Q75MP2	Phosphodiesterase (Fragment) OS=Homo sapiens GN=PDE1C PE=3 SV=1 - [Q75MP2_HUMAN]	8.49	9.81	6	1	3	3	591	66.9	6.39
A0A0C4DH79	Round spermatid basic protein 1 OS=Homo sapiens GN=RSBN1 PE=1 SV=1 - [A0A0C4DH79_HUMAN]	8.49	2.43	3	1	1	4	411	45.7	9.77
B4DLD1	cDNA FLJ57342, highly similar to Laminin gamma-2 chain OS=Homo sapiens PE=2 SV=1 - [B4DLD1_HUMAN]	8.49	6.44	1	1	4	4	1010	110.6	6.99
A0A0S2Z377	Annexin (Fragment) OS=Homo sapiens GN=ANXA6 PE=2 SV=1 - [A0A0S2Z377_HUMAN]	8.47	7.65	5	2	3	3	667	75.2	5.67
A0A087WW76	Rho GTPase-activating protein 21 OS=Homo sapiens GN=ARHGAP21 PE=1 SV=1 - [A0A087WW76_HUMAN]	8.47	2.13	3	2	2	4	1406	155.9	7.68
A7E2D6	NAV2 protein OS=Homo sapiens GN=NAV2 PE=2 SV=1 - [A7E2D6_HUMAN]	8.47	1.52	6	3	3	4	2432	261.6	8.98
A0A0K1H1B1	Putative ATP-dependent RNA helicase DDX60 OS=Homo sapiens GN=DDX60L PE=2 SV=1 - [A0A0K1H1B1_HUMAN]	8.44	2.17	3	1	3	3	1706	197.6	8.29
Q14315	Filamin-C OS=Homo sapiens GN=FLNC PE=1 SV=3 - [FLNC_HUMAN]	8.44	2.42	2	3	4	4	2725	290.8	5.97
Q96T58	Msx2-interacting protein OS=Homo sapiens GN=SPEN PE=1 SV=1 - [MINT_HUMAN]	8.43	1.53	1	1	4	4	3664	402.0	7.64
H7C4P0	Rho guanine nucleotide exchange factor 3 (Fragment) OS=Homo sapiens GN=ARHGEF3 PE=1 SV=1 - [H7C4P0_HUMAN]	8.43	6.78	3	1	1	4	236	26.1	8.88
Q5Y190	Anchor protein OS=Homo sapiens GN=RESDA1 PE=2 SV=1 - [Q5Y190_HUMAN]	8.43	1.31	7	1	4	4	4186	453.0	6.83
D6W5N0	Membrane associated guanylate kinase, WW and PDZ domain containing 2, isoform CRA_b OS=Homo sapiens GN=MAGI2 PE=4 SV=1 - [D6W5N0_HUMAN]	8.42	4.15	17	1	3	4	1278	138.8	6.10
B2R5M3	cDNA, FLJ92530, highly similar to Homo sapiens chromogranin B (secretogranin 1) (CHGB), mRNA OS=Homo sapiens PE=2 SV=1 - [B2R5M3_HUMAN]	8.41	5.61	3	1	3	4	677	78.2	5.10
Q9P273	Teneurin-3 OS=Homo sapiens GN=TENM3 PE=2 SV=3 - [TEN3_HUMAN]	8.40	2.07	1	1	4	4	2699	300.8	6.42
A8K8U1	cDNA FLJ77762, highly similar to Homo sapiens cullin-associated and neddylation-dissociated 1 (CAND1), mRNA OS=Homo sapiens PE=2 SV=1 - [A8K8U1_HUMAN]	8.40	3.09	6	3	3	4	1230	136.2	5.83
Q96M83	Coiled-coil domain-containing protein 7 OS=Homo sapiens GN=CCDC7 PE=2 SV=3 - [CCDC7_HUMAN]	8.39	3.32	8	4	4	4	1385	157.4	7.58
B3KQ30	Iron-sulfur cluster assembly enzyme ISCU, mitochondrial OS=Homo sapiens GN=ISCU PE=1 SV=1 - [B3KQ30_HUMAN]	8.39	28.21	7	2	4	4	156	16.9	9.64
Q8NFG4	Folliculin OS=Homo sapiens GN=FLCN PE=1 SV=1 - [FLCN_HUMAN]	8.39	5.35	3	2	2	4	579	64.4	6.23
Q9Y2K3	Myosin-15 OS=Homo sapiens GN=MYH15 PE=1 SV=5 - [MYH15_HUMAN]	8.38	2.67	2	2	3	3	1946	224.5	5.85
Q59FZ6	SWI/SNF-related matrix-associated actin-dependent regulator of chromatin a4 variant (Fragment) OS=Homo sapiens PE=2 SV=2 - [Q59FZ6_HUMAN]	8.33	3.86	9	1	3	4	1165	129.6	9.16
O43918	Autoimmune regulator OS=Homo sapiens GN=AIRE PE=1 SV=1 - [AIRE_HUMAN]	8.33	6.42	1	1	2	4	545	57.7	7.56
A1L0S8	CROCC protein (Fragment) OS=Homo sapiens GN=CROCC PE=2 SV=1 - [A1L0S8_HUMAN]	8.33	3.36	5	3	3	4	1132	129.4	5.31
A0A087WWR3	Hydroxysteroid 11-beta-dehydrogenase 1-like protein OS=Homo sapiens GN=HSD11B1L PE=4 SV=1 - [A0A087WWR3_HUMAN]	8.32	9.91	3	3	3	4	333	35.9	10.13
C9J8H1	V-type proton ATPase subunit E 1 (Fragment) OS=Homo sapiens GN=ATP6V1E1 PE=1 SV=1 - [C9J8H1_HUMAN]	8.32	5.91	2	1	1	3	203	23.5	9.04
B7Z7S9	cDNA FLJ61724, highly similar to Shugoshin-like 2 OS=Homo sapiens PE=2 SV=1 - [B7Z7S9_HUMAN]	8.32	1.83	3	1	2	4	1260	143.9	7.59
Q53TD0	Putative uncharacterized protein SP100 (Fragment) OS=Homo sapiens GN=SP100 PE=4 SV=1 - [Q53TD0_HUMAN]	8.31	4.86	5	3	3	4	843	96.5	8.31
P40222	Alpha-taxilin OS=Homo sapiens GN=TXLNA PE=1 SV=3 - [TXLNA_HUMAN]	8.30	11.90	1	3	4	4	546	61.9	6.52
A8K4T6	cDNA FLJ76282, highly similar to Homo sapiens proteasome (prosome, macropain) 26S subunit, non-ATPase, 5 (PSMD5), mRNA OS=Homo sapiens PE=2 SV=1 - [A8K4T6_HUMAN]	8.28	7.34	3	3	3	3	504	56.2	5.57
Q59ES2	Inositol 1,4,5-trisphosphate receptor type 3 variant (Fragment) OS=Homo sapiens PE=2 SV=1 - [Q59ES2_HUMAN]	8.28	1.15	3	1	2	4	2341	266.9	6.33
Q02809	Procollagen-lysine,2-oxoglutarate 5-dioxygenase 1 OS=Homo sapiens GN=PLOD1 PE=1 SV=2 - [PLOD1_HUMAN]	8.27	5.91	3	2	3	3	727	83.5	6.95
Q6PK50	HSP90AB1 protein (Fragment) OS=Homo sapiens GN=HSP90AB1 PE=1 SV=1 - [Q6PK50_HUMAN]	8.25	10.54	5	1	3	3	351	40.3	4.97
Q8TC04	Keratin 23 (Histone deacetylase inducible) OS=Homo sapiens GN=KRT23 PE=2 SV=1 - [Q8TC04_HUMAN]	8.19	2.13	1	1	2	3	422	48.1	6.54
Q6ZV17	cDNA FLJ43104 fis, clone CTONG2010803, highly similar to Regulator of G-protein signaling 3 OS=Homo sapiens PE=2 SV=1 - [Q6ZV17_HUMAN]	8.17	18.38	10	3	3	3	370	39.1	4.46
E7EX44	Caldesmon OS=Homo sapiens GN=CALD1 PE=1 SV=1 - [E7EX44_HUMAN]	8.14	7.36	11	1	3	3	557	64.1	7.02
B2R8A9	cDNA, FLJ93812, highly similar to Homo sapiens branched chain keto acid dehydrogenase E1, alphapolypeptide (maple syrup urine disease) (BCKDHA), mRNA OS=Homo sapiens PE=2 SV=1 - [B2R8A9_HUMAN]	8.10	13.71	7	2	3	3	445	50.4	8.59
Q96HU8	GTP-binding protein Di-Ras2 OS=Homo sapiens GN=DIRAS2 PE=1 SV=1 - [DIRA2_HUMAN]	8.08	20.10	1	1	2	3	199	22.5	8.76
B4DY51	cDNA FLJ55546, highly similar to Protein GPR89A OS=Homo sapiens PE=2 SV=1 - [B4DY51_HUMAN]	8.07	2.74	1	1	1	3	402	46.5	9.38
B5MDQ0	DNA excision repair protein ERCC-6-like OS=Homo sapiens GN=ERCC6L PE=1 SV=1 - [B5MDQ0_HUMAN]	8.06	4.35	2	3	3	3	1127	126.9	5.40
E9PEW5	Unconventional myosin-X OS=Homo sapiens GN=MYO10 PE=1 SV=1 - [E9PEW5_HUMAN]	8.06	1.72	10	1	2	3	1397	161.4	6.25
Q9BX66	Sorbin and SH3 domain-containing protein 1 OS=Homo sapiens GN=SORBS1 PE=1 SV=3 - [SRBS1_HUMAN]	8.04	4.72	3	1	3	3	1292	142.4	6.84
K7EQL1	Protein FAM98C (Fragment) OS=Homo sapiens GN=FAM98C PE=1 SV=1 - [K7EQL1_HUMAN]	8.02	15.47	1	2	2	3	181	18.2	8.53
Q05BW3	NES protein (Fragment) OS=Homo sapiens GN=NES PE=2 SV=1 - [Q05BW3_HUMAN]	8.01	7.12	4	2	3	3	590	65.3	5.17
J9ZVQ3	Apolipoprotein E (Fragment) OS=Homo sapiens GN=APOE PE=3 SV=1 - [J9ZVQ3_HUMAN]	7.97	10.92	12	1	2	3	238	26.8	8.12
P31930	Cytochrome b-c1 complex subunit 1, mitochondrial OS=Homo sapiens GN=UQCRC1 PE=1 SV=3 - [QCR1_HUMAN]	7.97	6.04	2	2	2	3	480	52.6	6.37
Q5QGZ9	C-type lectin domain family 12 member A OS=Homo sapiens GN=CLEC12A PE=1 SV=3 - [CL12A_HUMAN]	7.94	4.53	1	1	1	3	265	30.7	8.60
J3KRA9	Serine/threonine-protein kinase SMG1 (Fragment) OS=Homo sapiens GN=SMG1 PE=1 SV=1 - [J3KRA9_HUMAN]	7.92	1.10	2	2	3	3	3551	398.6	6.33
Q8N2I9	Serine/threonine-protein kinase 40 OS=Homo sapiens GN=STK40 PE=1 SV=2 - [STK40_HUMAN]	7.91	5.06	1	1	2	3	435	49.0	7.93
A0A0A0MS24	Protein phosphatase 1 regulatory subunit OS=Homo sapiens GN=PPP1R12B PE=1 SV=1 - [A0A0A0MS24_HUMAN]	7.90	5.27	8	2	3	3	1043	116.4	5.85
Q8N9V7	Testis- and ovary-specific PAZ domain-containing protein 1 OS=Homo sapiens GN=TOPAZ1 PE=2 SV=3 - [TOPZ1_HUMAN]	7.89	2.90	1	3	3	3	1692	190.8	7.87
Q9BYE9	Cadherin-related family member 2 OS=Homo sapiens GN=CDHR2 PE=1 SV=2 - [CDHR2_HUMAN]	7.87	3.97	1	2	3	3	1310	141.5	4.50
Q6NUQ2	Calmin (Calponin-like, transmembrane) OS=Homo sapiens GN=CLMN PE=2 SV=1 - [Q6NUQ2_HUMAN]	7.86	2.59	5	2	2	3	1002	111.6	4.93
A0A087WWW8	Calcineurin-binding protein cabin-1 OS=Homo sapiens GN=CABIN1 PE=1 SV=1 - [A0A087WWW8_HUMAN]	7.85	3.23	6	3	3	3	2170	240.6	6.02
B4DY26	Receptor protein serine/threonine kinase OS=Homo sapiens GN=TGFBR1 PE=1 SV=1 - [B4DY26_HUMAN]	7.83	6.45	4	2	2	3	434	48.8	7.77
A8K594	cDNA FLJ77256, highly similar to Homo sapiens SH3-domain binding protein 4 (SH3BP4), mRNA OS=Homo sapiens PE=2 SV=1 - [A8K594_HUMAN]	7.82	5.82	3	1	3	3	963	107.4	7.59
A6NCT7	Collagen alpha-1(XVI) chain OS=Homo sapiens GN=COL16A1 PE=1 SV=1 - [A6NCT7_HUMAN]	7.81	4.35	3	2	2	3	966	96.7	8.10
Q5TEE2	Histone deacetylase 1 (Fragment) OS=Homo sapiens GN=HDAC1 PE=1 SV=1 - [Q5TEE2_HUMAN]	7.79	11.85	17	2	2	3	211	24.5	8.31
Q59EV0	RAB40B, member RAS oncogene family variant (Fragment) OS=Homo sapiens PE=2 SV=1 - [Q59EV0_HUMAN]	7.77	16.58	3	2	3	4	380	42.1	10.13
C9J931	GTP-binding protein Rheb OS=Homo sapiens GN=RHEB PE=1 SV=1 - [C9J931_HUMAN]	7.76	62.03	4	3	3	3	79	8.7	6.02
Q96S01	Putative uncharacterized protein gs82 OS=Homo sapiens GN=gs82 PE=4 SV=1 - [Q96S01_HUMAN]	7.75	3.21	1	1	1	3	436	44.9	9.57
B4DZI4	Phospholipase A2 OS=Homo sapiens PE=2 SV=1 - [B4DZI4_HUMAN]	7.74	1.60	3	1	1	3	689	78.2	5.26
B2R858	cDNA, FLJ93750, Homo sapiens DEAD (Asp-Glu-Ala-Asp) box polypeptide 6 (DDX6), mRNA OS=Homo sapiens PE=2 SV=1 - [B2R858_HUMAN]	7.74	8.69	3	2	2	3	472	53.2	8.66
Q6ZMN7	PDZ domain-containing RING finger protein 4 OS=Homo sapiens GN=PDZRN4 PE=2 SV=3 - [PZRN4_HUMAN]	7.74	2.41	4	1	2	4	1036	117.0	5.87
Q8TF46	DIS3-like exonuclease 1 OS=Homo sapiens GN=DIS3L PE=1 SV=2 - [DI3L1_HUMAN]	7.74	4.27	4	2	3	3	1054	120.7	6.54
Q6UWP8	Suprabasin OS=Homo sapiens GN=SBSN PE=1 SV=2 - [SBSN_HUMAN]	7.74	17.63	2	3	3	3	590	60.5	7.01
B7Z1P1	cDNA FLJ50119, highly similar to Endothelin-converting enzyme 2 (EC 3.4.24.71) OS=Homo sapiens PE=2 SV=1 - [B7Z1P1_HUMAN]	7.72	13.90	1	2	2	3	331	36.4	7.27
A8K9Y8	cDNA FLJ77442, highly similar to Homo sapiens grainyhead-like 2 (Drosophila), mRNA OS=Homo sapiens PE=2 SV=1 - [A8K9Y8_HUMAN]	7.71	7.68	3	1	3	3	625	71.0	6.58
D3DPS3	Arginine/proline rich coiled-coil 1, isoform CRA_b OS=Homo sapiens GN=RPRC1 PE=4 SV=1 - [D3DPS3_HUMAN]	7.71	5.36	6	3	3	3	840	92.6	10.11
B3KMF4	cDNA FLJ10848 fis, clone NT2RP4001407, highly similar to Afadin- and alpha-actinin-binding protein OS=Homo sapiens PE=2 SV=1 - [B3KMF4_HUMAN]	7.69	7.19	5	2	2	3	417	48.6	6.64
F8WCR1	60S ribosomal protein L3 OS=Homo sapiens GN=RPL3 PE=1 SV=1 - [F8WCR1_HUMAN]	7.68	8.33	1	1	1	3	180	19.8	9.95
A7E2Y1	Myosin-7B OS=Homo sapiens GN=MYH7B PE=1 SV=3 - [MYH7B_HUMAN]	7.67	3.19	2	2	3	3	1941	221.3	6.01
X6RKW4	Peptidylprolyl isomerase (Fragment) OS=Homo sapiens GN=FKBP15 PE=1 SV=1 - [X6RKW4_HUMAN]	7.67	5.84	4	3	3	3	497	52.9	6.81
B4DZC5	cDNA FLJ52811, highly similar to Homo sapiens spermatogenesis associated 20 (SPATA20), mRNA OS=Homo sapiens PE=2 SV=1 - [B4DZC5_HUMAN]	7.66	11.68	7	3	3	3	428	47.8	8.92
B3KT59	cDNA FLJ37698 fis, clone BRHIP2015679, highly similar to Ataxin-2 OS=Homo sapiens PE=2 SV=1 - [B3KT59_HUMAN]	7.65	10.58	9	3	3	3	416	45.4	6.70
Q6ZSJ9	Protein shisa-6 homolog OS=Homo sapiens GN=SHISA6 PE=2 SV=2 - [SHSA6_HUMAN]	7.65	4.80	2	2	3	3	500	55.7	9.35
B4DRQ4	Alpha-1,4 glucan phosphorylase OS=Homo sapiens PE=2 SV=1 - [B4DRQ4_HUMAN]	7.65	8.74	8	2	3	3	595	67.6	6.35
A8K6L5	cDNA FLJ75063 OS=Homo sapiens PE=2 SV=1 - [A8K6L5_HUMAN]	7.65	5.90	4	2	3	3	678	74.3	6.93
Q6UB99	Ankyrin repeat domain-containing protein 11 OS=Homo sapiens GN=ANKRD11 PE=1 SV=3 - [ANR11_HUMAN]	7.65	0.71	4	1	2	3	2663	297.7	7.11
A6N6J7	JARID1C protein OS=Homo sapiens GN=JARID1C PE=2 SV=1 - [A6N6J7_HUMAN]	7.64	3.75	2	2	3	3	1440	162.6	5.73
B3KW36	cDNA FLJ42080 fis, clone SYNOV4000249, highly similar to Nephrocystin-4 OS=Homo sapiens PE=2 SV=1 - [B3KW36_HUMAN]	7.63	4.05	4	1	3	3	914	101.0	8.34
Q5JYJ5	Proto-oncogene DBL (Fragment) OS=Homo sapiens GN=MCF2 PE=1 SV=1 - [Q5JYJ5_HUMAN]	7.62	5.87	6	2	3	3	528	61.6	7.21
B7Z2F5	cDNA FLJ55918, highly similar to Echinoderm microtubule-associated protein-like 2 OS=Homo sapiens PE=2 SV=1 - [B7Z2F5_HUMAN]	7.62	3.72	4	1	2	3	807	87.2	7.30
Q96RW7	Hemicentin-1 OS=Homo sapiens GN=HMCN1 PE=1 SV=2 - [HMCN1_HUMAN]	7.61	0.71	1	2	3	3	5635	613.0	6.49
Q3SY77	UDP-glucuronosyltransferase 3A2 OS=Homo sapiens GN=UGT3A2 PE=2 SV=1 - [UD3A2_HUMAN]	7.61	5.16	3	1	3	3	523	59.5	8.31
P36402	Transcription factor 7 OS=Homo sapiens GN=TCF7 PE=1 SV=3 - [TCF7_HUMAN]	7.59	7.03	6	2	2	3	384	41.6	6.81
B4DDI0	cDNA FLJ55951, highly similar to Homo sapiens nexilin (F actin binding protein) (NEXN), mRNA OS=Homo sapiens PE=2 SV=1 - [B4DDI0_HUMAN]	7.59	8.76	7	2	3	3	388	46.1	4.92
B7Z5L6	cDNA FLJ54723, highly similar to Poly (ADP-ribose) polymerase 9 (EC 2.4.2.30) OS=Homo sapiens PE=2 SV=1 - [B7Z5L6_HUMAN]	7.57	3.35	6	1	2	3	777	87.5	8.15
Q53SE4	Diacylglycerol kinase (Fragment) OS=Homo sapiens GN=DGKD PE=3 SV=1 - [Q53SE4_HUMAN]	7.55	5.65	4	2	3	3	1098	121.8	7.21
E9PC52	Histone-binding protein RBBP7 OS=Homo sapiens GN=RBBP7 PE=1 SV=1 - [E9PC52_HUMAN]	7.54	5.29	4	2	2	3	416	46.9	5.07
A0A0D9SFT8	Nuclear receptor coactivator 6 (Fragment) OS=Homo sapiens GN=NCOA6 PE=1 SV=4 - [A0A0D9SFT8_HUMAN]	7.54	5.45	5	1	1	3	220	23.7	9.79
B7Z3D7	cDNA FLJ55213, highly similar to Rattus norvegicus Arg/Abl-interacting protein ArgBP2 (Argbp2), mRNA OS=Homo sapiens PE=2 SV=1 - [B7Z3D7_HUMAN]	7.54	14.13	9	1	3	3	375	41.1	9.69
Q9P225	Dynein heavy chain 2, axonemal OS=Homo sapiens GN=DNAH2 PE=2 SV=3 - [DYH2_HUMAN]	7.54	1.26	1	3	3	3	4427	507.4	6.37
P10599	Thioredoxin OS=Homo sapiens GN=TXN PE=1 SV=3 - [THIO_HUMAN]	7.53	12.38	1	1	1	3	105	11.7	4.92
F5H7B7	ATP-binding cassette sub-family A member 13 (Fragment) OS=Homo sapiens GN=ABCA13 PE=1 SV=2 - [F5H7B7_HUMAN]	7.53	1.65	5	1	3	3	2366	266.8	7.66
O95876	WD repeat-containing and planar cell polarity effector protein fritz homolog OS=Homo sapiens GN=WDPCP PE=1 SV=2 - [FRITZ_HUMAN]	7.53	5.50	6	2	3	3	746	85.0	6.39
A0A024R7T0	HCG1770448, isoform CRA_c OS=Homo sapiens GN=hCG_1770448 PE=4 SV=1 - [A0A024R7T0_HUMAN]	7.52	12.07	1	1	1	3	116	12.4	6.89
Q9Y2I6	Ninein-like protein OS=Homo sapiens GN=NINL PE=1 SV=2 - [NINL_HUMAN]	7.51	2.89	2	3	3	3	1382	156.2	5.06
A4D2M3	LOC401367 OS=Homo sapiens GN=LOC401367 PE=4 SV=1 - [A4D2M3_HUMAN]	7.51	19.40	1	1	2	3	201	20.4	11.94
P12036	Neurofilament heavy polypeptide OS=Homo sapiens GN=NEFH PE=1 SV=4 - [NFH_HUMAN]	7.51	2.05	6	1	2	3	1026	112.4	6.18
K7EKZ1	Ubiquitin carboxyl-terminal hydrolase 32 (Fragment) OS=Homo sapiens GN=USP32 PE=1 SV=1 - [K7EKZ1_HUMAN]	7.50	6.61	4	2	3	3	847	96.8	6.44
P13535	Myosin-8 OS=Homo sapiens GN=MYH8 PE=1 SV=3 - [MYH8_HUMAN]	7.48	1.03	4	2	2	3	1937	222.6	5.74
B4DRH6	cDNA FLJ54509, highly similar to Trifunctional enzyme subunit alpha, mitochondrial OS=Homo sapiens PE=2 SV=1 - [B4DRH6_HUMAN]	7.48	5.30	4	3	3	3	717	78.3	8.92
Q8IZF0	Sodium leak channel non-selective protein OS=Homo sapiens GN=NALCN PE=1 SV=1 - [NALCN_HUMAN]	7.48	2.53	2	1	3	3	1738	200.2	8.68
E9PCT1	Serine/arginine repetitive matrix protein 1 OS=Homo sapiens GN=SRRM1 PE=1 SV=3 - [E9PCT1_HUMAN]	7.47	5.12	7	1	3	3	820	93.4	11.93
Q07954	Prolow-density lipoprotein receptor-related protein 1 OS=Homo sapiens GN=LRP1 PE=1 SV=2 - [LRP1_HUMAN]	7.46	1.25	1	1	3	3	4544	504.3	5.39
O60287	Nucleolar pre-ribosomal-associated protein 1 OS=Homo sapiens GN=URB1 PE=1 SV=4 - [NPA1P_HUMAN]	7.46	1.50	1	1	3	3	2271	254.2	6.47
Q9BX69	Caspase recruitment domain-containing protein 6 OS=Homo sapiens GN=CARD6 PE=1 SV=2 - [CARD6_HUMAN]	7.46	5.79	2	2	3	3	1037	116.4	6.37
A0A1B4Z394	Tubulin gamma chain OS=Homo sapiens GN=TUBG2 PE=2 SV=1 - [A0A1B4Z394_HUMAN]	7.46	8.48	5	1	2	3	460	52.1	6.02
A0A087WYC1	Heat shock 70 kDa protein 4 OS=Homo sapiens GN=HSPA4 PE=1 SV=1 - [A0A087WYC1_HUMAN]	7.46	5.72	19	3	3	3	699	78.6	5.17
O75170	Serine/threonine-protein phosphatase 6 regulatory subunit 2 OS=Homo sapiens GN=PPP6R2 PE=1 SV=2 - [PP6R2_HUMAN]	7.46	3.11	1	1	2	3	966	104.9	4.87
B3KRR2	Chloride channel protein OS=Homo sapiens PE=2 SV=1 - [B3KRR2_HUMAN]	7.46	2.31	1	2	2	3	648	71.7	8.25
Q2M3C7	A-kinase anchor protein SPHKAP OS=Homo sapiens GN=SPHKAP PE=1 SV=1 - [SPKAP_HUMAN]	7.45	2.65	2	2	3	3	1700	186.3	5.14
Q99698	Lysosomal-trafficking regulator OS=Homo sapiens GN=LYST PE=1 SV=3 - [LYST_HUMAN]	7.44	1.13	3	3	3	3	3801	428.9	6.61
O43594	Ku86 autoantigen related protein 1 (Fragment) OS=Homo sapiens GN=KARP-1 PE=4 SV=1 - [O43594_HUMAN]	7.44	8.97	1	1	1	3	156	17.9	12.37
Q5VZP5	Inactive dual specificity phosphatase 27 OS=Homo sapiens GN=DUSP27 PE=2 SV=1 - [DUS27_HUMAN]	7.44	2.07	1	1	2	3	1158	130.1	5.17
B3KN38	cDNA FLJ13426 fis, clone PLACE1002450, highly similar to Zinc finger and BTB domain-containing protein11 OS=Homo sapiens PE=2 SV=1 - [B3KN38_HUMAN]	7.44	7.43	3	2	2	3	269	30.7	8.54
Q6YHK3	CD109 antigen OS=Homo sapiens GN=CD109 PE=1 SV=2 - [CD109_HUMAN]	7.44	2.21	1	1	2	3	1445	161.6	5.85
Q6WCQ1	Myosin phosphatase Rho-interacting protein OS=Homo sapiens GN=MPRIP PE=1 SV=3 - [MPRIP_HUMAN]	7.44	2.83	6	2	2	3	1025	116.5	6.21
Q38IJ6	Ring finger and KH domain containing 1 protein variant 1 (Fragment) OS=Homo sapiens GN=RKHD1 PE=2 SV=1 - [Q38IJ6_HUMAN]	7.44	21.21	10	1	3	3	165	17.7	10.68
P55317	Hepatocyte nuclear factor 3-alpha OS=Homo sapiens GN=FOXA1 PE=1 SV=2 - [FOXA1_HUMAN]	7.43	6.57	2	2	2	3	472	49.1	8.82
G5EA42	Tropomodulin 2 (Neuronal), isoform CRA_a OS=Homo sapiens GN=TMOD2 PE=1 SV=1 - [G5EA42_HUMAN]	7.43	19.22	5	2	3	3	307	34.5	6.86
M4QHP2	Piezo-type mechanosensitive ion channel component OS=Homo sapiens GN=PIEZO1 PE=2 SV=1 - [M4QHP2_HUMAN]	7.43	0.95	3	1	2	3	2520	286.5	7.43
B6A8C7	T-cell-interacting, activating receptor on myeloid cells protein 1 OS=Homo sapiens GN=TARM1 PE=2 SV=1 - [TARM1_HUMAN]	7.43	4.80	2	1	1	3	271	29.5	8.62
Q86YJ5	E3 ubiquitin-protein ligase MARCH9 OS=Homo sapiens GN=MARCH9 PE=1 SV=2 - [MARH9_HUMAN]	7.43	15.32	2	2	3	3	346	37.7	9.13
A0A140TA70	Sal-like protein 3 OS=Homo sapiens GN=SALL3 PE=1 SV=1 - [A0A140TA70_HUMAN]	7.42	4.08	5	1	3	3	1300	135.2	6.99
H0YNE8	Amyloid beta A4 precursor protein-binding family A member 2 (Fragment) OS=Homo sapiens GN=APBA2 PE=1 SV=1 - [H0YNE8_HUMAN]	7.42	62.96	5	1	1	3	27	3.0	10.74
B0AZN7	cDNA, FLJ79477, highly similar to Protein-glutamine gamma-glutamyltransferase K(EC 2.3.2.13) OS=Homo sapiens PE=2 SV=1 - [B0AZN7_HUMAN]	7.41	6.85	5	1	3	3	817	89.7	6.04
A8MPS7	Carbohydrate deacetylase OS=Homo sapiens GN=YDJC PE=1 SV=1 - [YDJC_HUMAN]	7.41	11.46	1	1	3	3	323	34.4	6.39
L8E9F8	Alternative protein INSM2 OS=Homo sapiens GN=INSM2 PE=4 SV=1 - [L8E9F8_HUMAN]	7.41	20.92	1	2	2	3	153	16.1	12.12
Q5R356	Phosphatase and actin regulator 1 OS=Homo sapiens GN=PHACTR1 PE=1 SV=1 - [Q5R356_HUMAN]	7.41	7.10	4	1	1	3	169	18.5	6.79
G3V311	Pleckstrin homology domain-containing family G member 3 OS=Homo sapiens GN=PLEKHG3 PE=1 SV=1 - [G3V311_HUMAN]	7.41	2.07	2	1	1	2	724	77.7	5.20
E9PKH2	Serpin H1 OS=Homo sapiens GN=SERPINH1 PE=1 SV=1 - [E9PKH2_HUMAN]	7.40	16.92	7	3	3	3	201	23.1	8.28
B3KPR5	cDNA FLJ32094 fis, clone OCBBF2000986, highly similar to Homo sapiens elongation factor Tu GTP binding domain containing 1, transcript variant 1, mRNA OS=Homo sapiens PE=2 SV=1 - [B3KPR5_HUMAN]	7.40	5.72	2	1	3	3	857	96.0	6.43
C9J0J7	Profilin OS=Homo sapiens GN=PFN2 PE=1 SV=1 - [C9J0J7_HUMAN]	7.40	20.88	8	2	2	3	91	9.8	9.17
A8MVM1	Caspase-3 OS=Homo sapiens GN=CASP3 PE=1 SV=2 - [A8MVM1_HUMAN]	7.40	13.19	4	2	2	3	182	20.5	7.81
F5H450	Frizzled-10 OS=Homo sapiens GN=FZD10 PE=4 SV=1 - [F5H450_HUMAN]	7.39	2.86	1	1	1	3	454	48.7	11.84
B2RA66	cDNA, FLJ94721, highly similar to Homo sapiens HLA-B associated transcript 4 (BAT4), mRNA OS=Homo sapiens PE=2 SV=1 - [B2RA66_HUMAN]	7.39	14.04	9	3	3	3	356	39.2	8.19
Q13724	Mannosyl-oligosaccharide glucosidase OS=Homo sapiens GN=MOGS PE=1 SV=5 - [MOGS_HUMAN]	7.35	5.97	5	3	3	3	837	91.9	8.90
A1L0S7	TNS1 protein (Fragment) OS=Homo sapiens GN=TNS1 PE=2 SV=2 - [A1L0S7_HUMAN]	7.35	1.47	1	1	2	3	1768	188.9	7.90
B4DEW3	cDNA FLJ52864, moderately similar to Complexin-2 OS=Homo sapiens PE=2 SV=1 - [B4DEW3_HUMAN]	7.35	21.74	7	2	2	3	184	20.5	8.57
Q63HQ2	Pikachurin OS=Homo sapiens GN=EGFLAM PE=1 SV=2 - [EGFLA_HUMAN]	7.35	5.80	2	2	3	3	1017	111.2	7.40
Q9UMN6	Histone-lysine N-methyltransferase 2B OS=Homo sapiens GN=KMT2B PE=1 SV=1 - [KMT2B_HUMAN]	7.35	0.85	1	2	2	3	2715	293.3	8.22
D6RHH0	Luc7-like protein 3 (Fragment) OS=Homo sapiens GN=LUC7L3 PE=1 SV=1 - [D6RHH0_HUMAN]	7.35	30.56	3	1	1	3	36	4.3	10.80
O94986	Centrosomal protein of 152 kDa OS=Homo sapiens GN=CEP152 PE=1 SV=4 - [CE152_HUMAN]	7.34	1.46	4	1	2	3	1710	195.5	5.60
A8K899	cDNA FLJ77724, highly similar to Homo sapiens transcriptional adaptor 3 (NGG1 homolog, yeast)-like (TADA3L), transcript variant 1, mRNA OS=Homo sapiens PE=2 SV=1 - [A8K899_HUMAN]	7.34	6.02	3	2	2	3	432	48.9	6.23
P54259	Atrophin-1 OS=Homo sapiens GN=ATN1 PE=1 SV=3 - [ATN1_HUMAN]	7.34	4.71	3	2	3	3	1190	125.3	8.98
B4E0S6	cDNA FLJ55635, highly similar to pre-mRNA-splicing factorATP-dependent RNA helicase DHX15 (EC 3.6.1.-) OS=Homo sapiens PE=2 SV=1 - [B4E0S6_HUMAN]	7.34	4.72	2	3	3	3	784	89.5	7.46
F8WCR1	60S ribosomal protein L3 OS=Homo sapiens GN=RPL3 PE=1 SV=1 - [F8WCR1_HUMAN]	7.33	8.33	1	1	1	3	180	19.8	9.95
Q14512	Fibroblast growth factor-binding protein 1 OS=Homo sapiens GN=FGFBP1 PE=1 SV=1 - [FGFP1_HUMAN]	7.33	9.83	1	2	2	3	234	26.2	9.10
B7Z1N5	cDNA FLJ53830, highly similar to Sodium/potassium-transporting ATPase alpha-1 chain (EC 3.6.3.9) OS=Homo sapiens PE=2 SV=1 - [B7Z1N5_HUMAN]	7.33	16.30	6	1	3	3	405	44.6	5.48
E9PK47	Alpha-1,4 glucan phosphorylase OS=Homo sapiens GN=PYGL PE=1 SV=1 - [E9PK47_HUMAN]	7.32	5.13	3	2	3	3	819	94.0	7.31
B7Z9B7	cDNA FLJ54732, moderately similar to Sorbin and SH3 domain-containing protein 1 OS=Homo sapiens PE=2 SV=1 - [B7Z9B7_HUMAN]	7.32	7.44	3	1	3	3	860	93.2	8.56
A7MD96	SYNPO protein (Fragment) OS=Homo sapiens GN=SYNPO PE=2 SV=1 - [A7MD96_HUMAN]	7.32	5.41	3	3	3	3	887	94.7	9.74
B7WPD9	Kinesin-like protein KIF26B OS=Homo sapiens GN=KIF26B PE=1 SV=1 - [B7WPD9_HUMAN]	7.32	2.95	3	1	3	3	1727	184.6	8.34
A0A024R7S2	Receptor associated protein 80, isoform CRA_b OS=Homo sapiens GN=RAP80 PE=4 SV=1 - [A0A024R7S2_HUMAN]	7.32	8.22	2	3	3	3	596	65.8	5.34
B3KUD7	cDNA FLJ39640 fis, clone SMINT2003386, highly similar to DNA REPLICATION LICENSING FACTOR MCM7 OS=Homo sapiens PE=2 SV=1 - [B3KUD7_HUMAN]	7.31	7.03	7	1	3	3	612	68.5	7.62
O96028	Histone-lysine N-methyltransferase NSD2 OS=Homo sapiens GN=NSD2 PE=1 SV=1 - [NSD2_HUMAN]	7.30	3.52	5	1	3	3	1365	152.2	8.69
Q14568	Heat shock protein HSP 90-alpha A2 OS=Homo sapiens GN=HSP90AA2P PE=1 SV=2 - [HS902_HUMAN]	7.30	10.79	4	1	3	3	343	39.3	4.65
A0A087X1K6	Krueppel-like factor 13 OS=Homo sapiens GN=KLF13 PE=1 SV=1 - [A0A087X1K6_HUMAN]	7.29	8.39	3	2	2	3	286	31.2	9.95
Q9NXF1	Testis-expressed protein 10 OS=Homo sapiens GN=TEX10 PE=1 SV=2 - [TEX10_HUMAN]	7.29	2.69	2	1	2	3	929	105.6	9.36
A0A0S2Z4I7	Vasodilator-stimulated phosphoprotein isoform 4 (Fragment) OS=Homo sapiens GN=VASP PE=2 SV=1 - [A0A0S2Z4I7_HUMAN]	7.29	18.40	7	3	3	3	288	31.6	8.25
Q5VST9	Obscurin OS=Homo sapiens GN=OBSCN PE=1 SV=3 - [OBSCN_HUMAN]	7.28	0.55	3	1	3	3	7968	867.9	5.99
Q8TAX5	AFF4 protein OS=Homo sapiens GN=AFF4 PE=2 SV=1 - [Q8TAX5_HUMAN]	7.28	13.42	3	1	3	3	365	40.2	9.51
A3KN83	Protein strawberry notch homolog 1 OS=Homo sapiens GN=SBNO1 PE=1 SV=1 - [SBNO1_HUMAN]	7.27	2.08	5	2	3	4	1393	154.2	7.88
Q3BBV0	Neuroblastoma breakpoint family member 1 OS=Homo sapiens GN=NBPF1 PE=2 SV=1 - [NBPF1_HUMAN]	7.27	8.98	69	2	3	3	1214	139.3	4.78
O75420	PERQ amino acid-rich with GYF domain-containing protein 1 OS=Homo sapiens GN=GIGYF1 PE=1 SV=2 - [PERQ1_HUMAN]	7.27	5.22	2	1	3	3	1035	114.5	5.39
H0YLR3	U2 small nuclear ribonucleoprotein A' (Fragment) OS=Homo sapiens GN=SNRPA1 PE=1 SV=1 - [H0YLR3_HUMAN]	7.27	32.58	5	2	2	3	89	9.5	8.47
A0JP11	Phosphoinositide-3-kinase, regulatory subunit 4 OS=Homo sapiens GN=PIK3R4 PE=2 SV=1 - [A0JP11_HUMAN]	7.27	2.36	3	2	2	3	1358	153.1	7.23
Q96EK7	Constitutive coactivator of peroxisome proliferator-activated receptor gamma OS=Homo sapiens GN=FAM120B PE=1 SV=1 - [F120B_HUMAN]	7.27	4.84	6	2	3	3	910	103.7	5.69
Q8NAD7	cDNA FLJ35507 fis, clone SMINT2009468, moderately similar to Homo sapiens mawbp MAWD binding protein OS=Homo sapiens PE=2 SV=1 - [Q8NAD7_HUMAN]	7.26	35.51	4	2	3	3	138	15.6	5.30
Q06278	Aldehyde oxidase OS=Homo sapiens GN=AOX1 PE=1 SV=2 - [AOXA_HUMAN]	7.25	2.39	2	1	2	3	1338	147.8	7.17
Q86TR4	Full-length cDNA 5-PRIME end of clone CS0DI001YE04 of Placenta of Homo sapiens (human) (Fragment) OS=Homo sapiens PE=2 SV=1 - [Q86TR4_HUMAN]	7.25	6.69	4	1	3	3	598	63.4	5.94
J3QRH7	Probable E3 ubiquitin-protein ligase MARCH10 (Fragment) OS=Homo sapiens GN=MARCH10 PE=4 SV=2 - [J3QRH7_HUMAN]	7.25	3.90	5	2	2	3	693	76.9	7.05
A0A1B0GVP4	Ligand-dependent nuclear receptor corepressor-like protein OS=Homo sapiens GN=LCORL PE=1 SV=1 - [A0A1B0GVP4_HUMAN]	7.24	2.30	1	1	3	3	1871	211.4	9.04
Q86UW6	NEDD4-binding protein 2 OS=Homo sapiens GN=N4BP2 PE=1 SV=2 - [N4BP2_HUMAN]	7.24	2.77	4	1	3	3	1770	198.7	5.21
Q96EU7	C1GALT1-specific chaperone 1 OS=Homo sapiens GN=C1GALT1C1 PE=1 SV=1 - [C1GLC_HUMAN]	7.24	12.26	1	1	2	3	318	36.4	6.84
Q01094	Transcription factor E2F1 OS=Homo sapiens GN=E2F1 PE=1 SV=1 - [E2F1_HUMAN]	7.24	3.20	1	1	1	3	437	46.9	4.92
C9JTQ0	Ankyrin repeat domain-containing protein 63 OS=Homo sapiens GN=ANKRD63 PE=3 SV=1 - [ANR63_HUMAN]	7.23	3.68	1	1	1	3	380	39.6	11.03
B3KT81	cDNA FLJ37836 fis, clone BRSSN2010587, weakly similar to Homo sapiens MDN1, midasin homolog (yeast) (MDN1), mRNA OS=Homo sapiens PE=2 SV=1 - [B3KT81_HUMAN]	7.23	2.06	2	1	2	3	1018	114.7	7.65
B4DYU1	cDNA FLJ58343, highly similar to Homo sapiens acyl-CoA synthetase bubblegum family member 2 (ACSBG2), mRNA OS=Homo sapiens PE=2 SV=1 - [B4DYU1_HUMAN]	7.23	4.55	3	2	2	3	638	71.2	8.70
Q6IEH8	Transcriptional regulator OS=Homo sapiens GN=NIPBL PE=2 SV=1 - [Q6IEH8_HUMAN]	7.23	0.75	4	1	2	3	2804	315.9	7.91
Q9BQ02	NCL protein OS=Homo sapiens PE=2 SV=1 - [Q9BQ02_HUMAN]	7.22	4.98	6	2	2	3	482	50.9	5.02
P17858	ATP-dependent 6-phosphofructokinase, liver type OS=Homo sapiens GN=PFKL PE=1 SV=6 - [PFKAL_HUMAN]	7.22	5.13	4	3	3	3	780	85.0	7.50
A0A024RAC0	Leucine zipper protein 1, isoform CRA_a OS=Homo sapiens GN=LUZP1 PE=4 SV=1 - [A0A024RAC0_HUMAN]	7.21	4.09	2	2	3	3	1076	120.2	8.63
A0A087WWH3	Glioma tumor suppressor candidate region gene 1 protein OS=Homo sapiens GN=GLTSCR1 PE=1 SV=1 - [A0A087WWH3_HUMAN]	7.21	2.06	2	2	3	3	1508	152.7	7.46
E9PB90	Hexokinase-2 OS=Homo sapiens GN=HK2 PE=1 SV=1 - [E9PB90_HUMAN]	7.21	2.92	5	2	3	3	889	98.9	6.04
H0YCX0	Translationally-controlled tumor protein (Fragment) OS=Homo sapiens GN=TPT1 PE=1 SV=1 - [H0YCX0_HUMAN]	7.20	15.58	8	1	1	3	77	9.1	6.51
Q9H2Y7	Zinc finger protein 106 OS=Homo sapiens GN=ZNF106 PE=1 SV=1 - [ZN106_HUMAN]	7.20	2.07	6	2	3	3	1883	208.8	7.15
A0A087WTA8	Collagen alpha-2(I) chain OS=Homo sapiens GN=COL1A2 PE=1 SV=1 - [A0A087WTA8_HUMAN]	7.20	4.40	4	2	3	3	1364	129.1	9.01
A0A126LAW5	Glycoprotein OS=Homo sapiens GN=U21 PE=4 SV=1 - [A0A126LAW5_HUMAN]	7.20	11.09	1	2	3	3	433	49.2	8.50
R4S3J9	Titin (Fragment) OS=Homo sapiens PE=2 SV=1 - [R4S3J9_HUMAN]	7.20	18.99	1	1	1	3	79	9.1	5.38
B3KMA6	cDNA FLJ10609 fis, clone NT2RP2005276, highly similar to Long-chain-fatty-acid--CoA ligase 3 (EC 6.2.1.3) OS=Homo sapiens PE=2 SV=1 - [B3KMA6_HUMAN]	7.19	6.02	5	2	2	3	465	51.3	7.28
Q9H6A9	Pecanex-like protein 3 OS=Homo sapiens GN=PCNX3 PE=1 SV=2 - [PCX3_HUMAN]	7.18	1.97	1	2	3	3	2034	221.9	6.64
Q6ZSE7	cDNA FLJ45588 fis, clone BRTHA3014507 OS=Homo sapiens PE=2 SV=1 - [Q6ZSE7_HUMAN]	7.18	17.01	1	3	3	3	288	30.2	8.53
B4E208	cDNA FLJ53957, highly similar to Homeodomain-interacting protein kinase 3 (EC2.7.11.1) OS=Homo sapiens PE=2 SV=1 - [B4E208_HUMAN]	7.18	6.04	3	2	2	3	513	55.2	6.27
Q2LD37	Uncharacterized protein KIAA1109 OS=Homo sapiens GN=KIAA1109 PE=1 SV=2 - [K1109_HUMAN]	7.17	0.78	7	2	3	3	5005	555.1	6.58
C9JVY5	A-kinase anchor protein 2 (Fragment) OS=Homo sapiens GN=AKAP2 PE=1 SV=1 - [C9JVY5_HUMAN]	7.17	4.24	5	1	2	3	778	85.2	4.96
P48039	Melatonin receptor type 1A OS=Homo sapiens GN=MTNR1A PE=1 SV=1 - [MTR1A_HUMAN]	7.17	11.71	3	1	3	3	350	39.3	9.47
Q07283	Trichohyalin OS=Homo sapiens GN=TCHH PE=1 SV=2 - [TRHY_HUMAN]	7.16	1.96	3	2	3	3	1943	253.8	5.78
B4DHJ4	cDNA FLJ57931, highly similar to MORC family CW-type zinc finger 3 OS=Homo sapiens PE=2 SV=1 - [B4DHJ4_HUMAN]	7.16	4.03	5	2	3	3	868	99.2	5.57
B4DEP6	cDNA FLJ59206, highly similar to Eukaryotic translation initiation factor 4B OS=Homo sapiens PE=2 SV=1 - [B4DEP6_HUMAN]	7.15	7.33	10	3	3	3	587	66.1	5.71
Q5JPB2	Zinc finger protein 831 OS=Homo sapiens GN=ZNF831 PE=2 SV=4 - [ZN831_HUMAN]	7.15	1.73	1	1	2	3	1677	177.8	8.34
A0A0G2JNY7	Leukocyte immunoglobulin-like receptor subfamily B member 5 OS=Homo sapiens GN=LILRB5 PE=1 SV=1 - [A0A0G2JNY7_HUMAN]	7.15	10.20	8	2	3	3	490	52.9	7.17
B4DVS2	cDNA FLJ57617 OS=Homo sapiens PE=2 SV=1 - [B4DVS2_HUMAN]	7.15	2.63	4	1	2	3	800	88.8	4.97
E9PAV3	Nascent polypeptide-associated complex subunit alpha, muscle-specific form OS=Homo sapiens GN=NACA PE=1 SV=1 - [NACAM_HUMAN]	7.15	2.55	1	2	3	3	2078	205.3	9.58
O60504	Vinexin OS=Homo sapiens GN=SORBS3 PE=1 SV=2 - [VINEX_HUMAN]	7.15	5.66	5	2	2	3	671	75.3	9.45
Q59FH1	Transformation/transcription domain-associated protein variant (Fragment) OS=Homo sapiens PE=2 SV=1 - [Q59FH1_HUMAN]	7.14	1.03	4	2	3	3	3587	405.6	8.18
Q7RTY1	Monocarboxylate transporter 9 OS=Homo sapiens GN=SLC16A9 PE=1 SV=1 - [MOT9_HUMAN]	7.14	3.93	1	1	1	3	509	55.8	7.96
Q9BX40	Protein LSM14 homolog B OS=Homo sapiens GN=LSM14B PE=1 SV=1 - [LS14B_HUMAN]	7.13	10.65	4	1	3	3	385	42.0	9.69
Q9BVN2	RUN and SH3 domain-containing protein 1 OS=Homo sapiens GN=RUSC1 PE=1 SV=3 - [RUSC1_HUMAN]	7.13	5.65	6	2	3	3	902	96.4	6.30
Q9H7S9	Zinc finger protein 703 OS=Homo sapiens GN=ZNF703 PE=1 SV=1 - [ZN703_HUMAN]	7.12	4.75	1	2	2	3	590	58.2	8.79
C9JPC9	Ubiquitin carboxyl-terminal hydrolase 42 (Fragment) OS=Homo sapiens GN=USP42 PE=1 SV=9 - [C9JPC9_HUMAN]	7.12	3.64	5	3	3	3	1043	114.4	8.12
Q2M3V2	Ankyrin repeat domain-containing protein SOWAHA OS=Homo sapiens GN=SOWAHA PE=1 SV=3 - [SWAHA_HUMAN]	7.11	6.01	1	2	2	3	549	57.4	10.18
A0A087X0K0	Collagen alpha-1(XV) chain OS=Homo sapiens GN=COL15A1 PE=1 SV=1 - [A0A087X0K0_HUMAN]	7.11	2.62	2	1	2	3	1374	140.0	4.98
H0YAH0	Protocadherin-7 (Fragment) OS=Homo sapiens GN=PCDH7 PE=1 SV=1 - [H0YAH0_HUMAN]	7.11	4.27	2	1	3	3	937	102.5	5.40
Q12797	Aspartyl/asparaginyl beta-hydroxylase OS=Homo sapiens GN=ASPH PE=1 SV=3 - [ASPH_HUMAN]	7.11	5.01	5	2	3	3	758	85.8	5.01
Q8IWV7	E3 ubiquitin-protein ligase UBR1 OS=Homo sapiens GN=UBR1 PE=1 SV=1 - [UBR1_HUMAN]	7.10	2.80	4	3	3	3	1749	200.1	6.01
H3BUV8	Lysyl oxidase homolog 1 OS=Homo sapiens GN=LOXL1 PE=1 SV=1 - [H3BUV8_HUMAN]	7.10	7.66	3	1	3	3	431	46.0	9.17
Q14571	Inositol 1,4,5-trisphosphate receptor type 2 OS=Homo sapiens GN=ITPR2 PE=1 SV=2 - [ITPR2_HUMAN]	7.09	1.52	2	1	3	3	2701	307.9	6.43
B4E223	cDNA FLJ52075, moderately similar to Mus musculus SPT2, Suppressor of Ty, domain containing 1, mRNA OS=Homo sapiens PE=2 SV=1 - [B4E223_HUMAN]	7.09	9.54	2	1	3	3	629	68.5	9.85
P19474	E3 ubiquitin-protein ligase TRIM21 OS=Homo sapiens GN=TRIM21 PE=1 SV=1 - [RO52_HUMAN]	7.09	5.68	1	2	2	2	475	54.1	6.38
B2RAM6	cDNA, FLJ95005, highly similar to Homo sapiens kinesin family member 11 (KIF11), mRNA OS=Homo sapiens PE=2 SV=1 - [B2RAM6_HUMAN]	7.08	2.56	2	1	2	3	1056	119.1	5.72
Q8N4P8	GTPBP4 protein (Fragment) OS=Homo sapiens GN=GTPBP4 PE=2 SV=1 - [Q8N4P8_HUMAN]	7.08	3.96	4	1	2	3	632	73.7	9.55
C9JE82	Voltage-dependent calcium channel subunit alpha-2/delta-2 OS=Homo sapiens GN=CACNA2D2 PE=1 SV=1 - [C9JE82_HUMAN]	7.08	3.76	3	1	3	3	1144	129.1	5.74
B4DN35	cDNA FLJ57853, highly similar to Rho-GTPase-activating protein 6 OS=Homo sapiens PE=2 SV=1 - [B4DN35_HUMAN]	7.07	10.62	6	1	3	3	499	54.0	5.12
Q499Y3	Putative uncharacterized protein C10orf88-like OS=Homo sapiens PE=2 SV=2 - [YJ016_HUMAN]	7.07	17.11	2	1	2	3	187	20.4	7.75
K7EQY1	Putative Polycomb group protein ASXL3 (Fragment) OS=Homo sapiens GN=ASXL3 PE=4 SV=1 - [K7EQY1_HUMAN]	7.07	8.94	1	1	3	4	179	19.6	9.20
B3KWP2	cDNA FLJ43498 fis, clone PEBLM2002594, highly similar to Homo sapiens ATP-binding cassette, sub-family A (ABC1), member 6 (ABCA6), transcript variant 1, mRNA OS=Homo sapiens PE=2 SV=1 - [B3KWP2_HUMAN]	7.07	3.35	3	1	1	3	477	53.7	7.78
H3BQD4	Ribosome biogenesis protein TSR3 homolog (Fragment) OS=Homo sapiens GN=TSR3 PE=4 SV=1 - [H3BQD4_HUMAN]	7.06	11.01	1	2	2	3	109	11.9	11.62
K7EK91	Dynein heavy chain 17, axonemal OS=Homo sapiens GN=DNAH17 PE=1 SV=1 - [K7EK91_HUMAN]	7.06	0.90	3	2	3	3	4457	508.5	5.72
M0QYH0	Procollagen galactosyltransferase 1 (Fragment) OS=Homo sapiens GN=COLGALT1 PE=1 SV=1 - [M0QYH0_HUMAN]	7.06	13.04	2	2	2	3	138	16.1	7.99
B3KUD1	cDNA FLJ39572 fis, clone SKMUS2002153, highly similar to Intraflagellar transport 122 homolog OS=Homo sapiens PE=2 SV=1 - [B3KUD1_HUMAN]	7.05	7.94	12	2	3	3	567	65.5	6.24
G3V2D8	Zinc finger FYVE domain-containing protein 26 OS=Homo sapiens GN=ZFYVE26 PE=1 SV=1 - [G3V2D8_HUMAN]	7.05	0.99	3	2	2	3	2225	248.6	6.07
B4DUT7	cDNA FLJ57604, highly similar to GMP synthase (glutamine-hydrolyzing) (EC 6.3.5.2) OS=Homo sapiens PE=2 SV=1 - [B4DUT7_HUMAN]	7.05	7.01	3	3	3	3	642	71.2	7.15
A4D2E1	PERQ amino acid rich, with GYF domain 1 OS=Homo sapiens GN=PERQ1 PE=4 SV=1 - [A4D2E1_HUMAN]	7.05	5.14	2	1	3	3	817	89.7	5.68
K7EQ02	DAZ-associated protein 1 (Fragment) OS=Homo sapiens GN=DAZAP1 PE=1 SV=2 - [K7EQ02_HUMAN]	7.05	3.67	5	1	1	3	327	35.0	7.85
Q53LP3	Ankyrin repeat domain-containing protein SOWAHC OS=Homo sapiens GN=SOWAHC PE=1 SV=1 - [SWAHC_HUMAN]	7.05	9.90	1	1	3	3	525	55.6	7.03
Q8N7Z5	Putative ankyrin repeat domain-containing protein 31 OS=Homo sapiens GN=ANKRD31 PE=5 SV=2 - [ANR31_HUMAN]	7.05	2.14	2	2	3	3	1873	210.7	6.20
Q86V81	THO complex subunit 4 OS=Homo sapiens GN=ALYREF PE=1 SV=3 - [THOC4_HUMAN]	7.04	10.12	2	2	2	4	257	26.9	11.15
Q2NNQ8	FER-1-like protein 4 OS=Homo sapiens GN=FER1L4 PE=2 SV=1 - [Q2NNQ8_HUMAN]	7.04	0.58	1	1	1	3	2055	230.0	5.97
O60548	Forkhead box protein D2 OS=Homo sapiens GN=FOXD2 PE=1 SV=2 - [FOXD2_HUMAN]	7.04	3.43	1	1	1	3	495	48.7	7.23
B4DL42	cDNA FLJ55921, highly similar to Homo sapiens adenosine deaminase, tRNA-specific 1 (ADAT1), mRNA OS=Homo sapiens PE=2 SV=1 - [B4DL42_HUMAN]	7.03	5.71	1	1	2	3	473	52.0	9.17
Q8N3C0	Activating signal cointegrator 1 complex subunit 3 OS=Homo sapiens GN=ASCC3 PE=1 SV=3 - [ASCC3_HUMAN]	7.03	2.32	1	2	3	3	2202	251.3	7.09
E7EUN2	Arf-GAP with GTPase, ANK repeat and PH domain-containing protein 1 OS=Homo sapiens GN=AGAP1 PE=1 SV=1 - [E7EUN2_HUMAN]	7.03	1.31	1	1	1	3	1069	116.5	8.72
Q6GQQ9	OTU domain-containing protein 7B OS=Homo sapiens GN=OTUD7B PE=1 SV=1 - [OTU7B_HUMAN]	7.03	5.69	1	2	3	3	843	92.5	6.71
A0A075B6Q3	BCL-6 corepressor-like protein 1 (Fragment) OS=Homo sapiens GN=BCORL1 PE=1 SV=1 - [A0A075B6Q3_HUMAN]	7.03	2.02	3	2	2	3	1385	150.5	8.56
B9EG57	IQ motif containing G OS=Homo sapiens GN=IQCG PE=2 SV=1 - [B9EG57_HUMAN]	7.03	2.48	3	2	2	3	443	52.0	6.61
P17181	Interferon alpha/beta receptor 1 OS=Homo sapiens GN=IFNAR1 PE=1 SV=3 - [INAR1_HUMAN]	7.02	4.49	1	1	2	3	557	63.5	5.81
Q8WXG9	G-protein coupled receptor 98 OS=Homo sapiens GN=GPR98 PE=1 SV=2 - [GPR98_HUMAN]	7.02	1.03	2	2	3	3	6306	692.6	4.64
A0A0S2Z486	Necdin-like protein isoform 2 (Fragment) OS=Homo sapiens GN=NDN PE=2 SV=1 - [A0A0S2Z486_HUMAN]	7.02	4.71	2	1	1	3	255	29.6	9.48
Q5KTC1	Transient receptor potential cation channel, subfamily M, member 2, striatum short form (SSF-TRPM2) OS=Homo sapiens GN=TRPM2 PE=2 SV=1 - [Q5KTC1_HUMAN]	7.02	3.03	5	3	3	3	1289	147.2	7.09
Q147U1	Zinc finger protein 846 OS=Homo sapiens GN=ZNF846 PE=1 SV=2 - [ZN846_HUMAN]	7.02	8.07	3	2	3	3	533	60.5	9.00
H0Y5Q9	Phosphatidylinositol 3,4,5-trisphosphate 5-phosphatase 1 (Fragment) OS=Homo sapiens GN=INPP5D PE=1 SV=1 - [H0Y5Q9_HUMAN]	7.02	1.60	2	1	1	3	810	90.5	8.19
A0A087WXB8	ST3 beta-galactoside alpha-2,3-sialyltransferase 6, isoform CRA_b OS=Homo sapiens GN=ST3GAL6 PE=1 SV=1 - [A0A087WXB8_HUMAN]	7.02	8.07	7	2	2	3	384	43.4	8.92
B7ZLF1	Src homology 2 domain containing E OS=Homo sapiens GN=SHE PE=2 SV=1 - [B7ZLF1_HUMAN]	7.01	8.89	4	2	3	3	495	53.9	9.10
Q9NXL9	DNA helicase MCM9 OS=Homo sapiens GN=MCM9 PE=1 SV=4 - [MCM9_HUMAN]	7.01	3.59	3	2	3	3	1143	127.2	7.74
Q8IYD8	Fanconi anemia group M protein OS=Homo sapiens GN=FANCM PE=1 SV=2 - [FANCM_HUMAN]	7.01	2.44	3	2	3	3	2048	232.0	6.11
B5A213	CREBBP (Fragment) OS=Homo sapiens GN=CREBBP PE=4 SV=1 - [B5A213_HUMAN]	7.01	25.00	1	1	1	3	60	6.8	7.30
B4DK23	cDNA FLJ61300 OS=Homo sapiens PE=2 SV=1 - [B4DK23_HUMAN]	7.01	4.71	4	3	3	3	1083	121.2	7.61
A0A087X018	Solute carrier family 2, facilitated glucose transporter member 11 OS=Homo sapiens GN=SLC2A11 PE=1 SV=1 - [A0A087X018_HUMAN]	7.01	2.99	1	2	2	3	535	57.1	8.79
E7ESI2	Cyclin-dependent kinase 2 OS=Homo sapiens GN=CDK2 PE=1 SV=1 - [E7ESI2_HUMAN]	7.00	9.66	6	1	2	3	238	27.1	9.31
G3V2N3	Paired mesoderm homeobox protein 1 OS=Homo sapiens GN=PRRX1 PE=1 SV=1 - [G3V2N3_HUMAN]	7.00	14.00	2	1	2	3	200	22.5	9.44
Q5SZ82	Required for meiotic nuclear division protein 1 homolog (Fragment) OS=Homo sapiens GN=RMND1 PE=1 SV=1 - [Q5SZ82_HUMAN]	7.00	13.74	3	2	2	3	211	24.0	5.45
Q3ZCV3	CYLC1 protein (Fragment) OS=Homo sapiens GN=CYLC1 PE=2 SV=1 - [Q3ZCV3_HUMAN]	7.00	7.64	4	2	3	3	563	63.8	9.61
B7ZMH1	KIAA1211 protein OS=Homo sapiens GN=KIAA1211 PE=2 SV=1 - [B7ZMH1_HUMAN]	7.00	2.75	6	1	2	3	1202	133.6	5.63
F8WB16	Cortactin-binding protein 2 OS=Homo sapiens GN=CTTNBP2 PE=1 SV=1 - [F8WB16_HUMAN]	6.99	4.22	7	1	2	3	640	69.0	8.47
P57071	PR domain zinc finger protein 15 OS=Homo sapiens GN=PRDM15 PE=1 SV=4 - [PRD15_HUMAN]	6.99	2.65	3	3	3	3	1507	169.2	8.24
H0Y5P9	Sodium/glucose cotransporter 4 (Fragment) OS=Homo sapiens GN=SLC5A9 PE=1 SV=1 - [H0Y5P9_HUMAN]	6.99	10.40	1	1	1	3	173	18.4	9.58
Q5VTR2	E3 ubiquitin-protein ligase BRE1A OS=Homo sapiens GN=RNF20 PE=1 SV=2 - [BRE1A_HUMAN]	6.99	4.62	4	1	3	3	975	113.6	5.94
B3KXF4	cDNA FLJ45324 fis, clone BRHIP3006449, highly similar to Catenin delta-2 OS=Homo sapiens PE=2 SV=1 - [B3KXF4_HUMAN]	6.99	6.69	8	3	3	3	792	87.1	8.34
B4DQ92	cDNA FLJ59379, highly similar to Hematopoietic lineage cell-specific protein OS=Homo sapiens PE=2 SV=1 - [B4DQ92_HUMAN]	6.99	7.13	3	2	3	3	449	49.6	4.75
P48549	G protein-activated inward rectifier potassium channel 1 OS=Homo sapiens GN=KCNJ3 PE=1 SV=1 - [KCNJ3_HUMAN]	6.99	10.38	5	2	3	3	501	56.6	8.22
B2R7A1	cDNA, FLJ93348, highly similar to Homo sapiens protein phosphatase 1D magnesium-dependent, delta isoform (PPM1D), mRNA OS=Homo sapiens PE=2 SV=1 - [B2R7A1_HUMAN]	6.99	6.78	4	2	3	3	605	66.6	8.94
Q9UK32	Ribosomal protein S6 kinase alpha-6 OS=Homo sapiens GN=RPS6KA6 PE=1 SV=1 - [KS6A6_HUMAN]	6.99	7.25	1	2	3	3	745	83.8	6.34
B3KRI8	cDNA FLJ34373 fis, clone FEBRA2017333, highly similar to Dual specificity protein kinase CLK3 (EC 2.7.12.1) OS=Homo sapiens PE=2 SV=1 - [B3KRI8_HUMAN]	6.99	6.90	2	1	3	3	638	73.5	9.95
B7ZB32	cDNA, FLJ79396, highly similar to Phenylalanyl-tRNA synthetase beta chain (EC 6.1.1.20) OS=Homo sapiens PE=2 SV=1 - [B7ZB32_HUMAN]	6.98	8.78	4	2	3	3	490	54.8	7.50
A0A126LAV0	Pp100 OS=Homo sapiens GN=U11 PE=4 SV=1 - [A0A126LAV0_HUMAN]	6.97	5.17	1	1	3	3	871	97.1	5.87
E9PNF3	L-aminoadipate-semialdehyde dehydrogenase-phosphopantetheinyl transferase (Fragment) OS=Homo sapiens GN=AASDHPPT PE=1 SV=1 - [E9PNF3_HUMAN]	6.97	21.88	3	2	3	3	160	18.7	7.50
Q9NQV8	PR domain zinc finger protein 8 OS=Homo sapiens GN=PRDM8 PE=1 SV=3 - [PRDM8_HUMAN]	6.97	6.10	3	1	3	3	689	71.6	7.84
P23368	NAD-dependent malic enzyme, mitochondrial OS=Homo sapiens GN=ME2 PE=1 SV=1 - [MAOM_HUMAN]	6.97	5.48	1	2	2	3	584	65.4	7.61
Q9Y6R9	Coiled-coil domain-containing protein 61 OS=Homo sapiens GN=CCDC61 PE=1 SV=3 - [CCD61_HUMAN]	6.97	8.20	1	2	3	3	512	57.3	10.27
Q6NVI1	MARCKS protein (Fragment) OS=Homo sapiens GN=MARCKS PE=2 SV=1 - [Q6NVI1_HUMAN]	6.97	21.02	2	2	2	3	157	14.9	4.79
P33981	Dual specificity protein kinase TTK OS=Homo sapiens GN=TTK PE=1 SV=2 - [TTK_HUMAN]	6.97	3.38	5	1	2	3	857	97.0	8.16
K7EKB6	Thimet oligopeptidase (Fragment) OS=Homo sapiens GN=THOP1 PE=1 SV=8 - [K7EKB6_HUMAN]	6.96	7.39	6	1	1	3	176	20.6	5.53
B3KRE8	cDNA FLJ34113 fis, clone FCBBF3008938, highly similar to Protein phosphatase Slingshot homolog 2 OS=Homo sapiens PE=2 SV=1 - [B3KRE8_HUMAN]	6.96	5.69	4	3	3	3	897	97.9	5.05
A0A0C4DFM2	HCG1643764, isoform CRA_b OS=Homo sapiens GN=ZNF574 PE=1 SV=1 - [A0A0C4DFM2_HUMAN]	6.96	2.54	4	1	2	3	986	108.6	8.41
K7EIP4	Laminin subunit alpha-3 (Fragment) OS=Homo sapiens GN=LAMA3 PE=1 SV=2 - [K7EIP4_HUMAN]	6.96	4.18	7	3	3	3	1147	128.2	6.99
K7EQ65	Uncharacterized protein C18orf8 OS=Homo sapiens GN=C18orf8 PE=1 SV=1 - [K7EQ65_HUMAN]	6.96	14.94	6	1	2	3	154	17.4	7.97
B4DKD3	cDNA FLJ51880, highly similar to Homo sapiens calcium channel, voltage-dependent, alpha 1G subunit, transcript variant 11, mRNA OS=Homo sapiens PE=2 SV=1 - [B4DKD3_HUMAN]	6.96	2.59	2	1	2	3	1314	144.7	7.23
Q96DY7	Mdm2-binding protein OS=Homo sapiens GN=MTBP PE=1 SV=1 - [MTBP_HUMAN]	6.96	1.00	1	1	1	3	904	102.1	7.77
Q7L7X3	Serine/threonine-protein kinase TAO1 OS=Homo sapiens GN=TAOK1 PE=1 SV=1 - [TAOK1_HUMAN]	6.96	3.70	1	2	3	3	1001	116.0	7.65
Q59FL8	Receptor protein-tyrosine kinase (Fragment) OS=Homo sapiens PE=2 SV=1 - [Q59FL8_HUMAN]	6.96	3.89	17	1	3	3	1081	119.9	6.79
K7EMR4	Solute carrier family 25 member 39 (Fragment) OS=Homo sapiens GN=SLC25A39 PE=3 SV=1 - [K7EMR4_HUMAN]	6.95	15.79	8	1	3	3	266	29.2	9.99
X5D7B2	Ca++-dependent secretion activator 2 isoform F (Fragment) OS=Homo sapiens GN=CADPS2 PE=2 SV=1 - [X5D7B2_HUMAN]	6.95	2.72	17	2	3	3	1250	142.8	6.14
B4DFU8	cDNA FLJ54647, highly similar to Liprin-beta-1 (Fragment) OS=Homo sapiens PE=2 SV=1 - [B4DFU8_HUMAN]	6.95	4.70	4	1	3	3	744	84.0	8.38
P54826	Growth arrest-specific protein 1 OS=Homo sapiens GN=GAS1 PE=2 SV=2 - [GAS1_HUMAN]	6.95	3.48	1	1	1	3	345	35.7	5.55
F8W8R3	DNA polymerase delta subunit 2 OS=Homo sapiens GN=POLD2 PE=1 SV=1 - [F8W8R3_HUMAN]	6.95	5.93	8	2	2	3	455	49.6	5.57
B1AKN3	Arginine-glutamic acid dipeptide (RE) repeats, isoform CRA_b OS=Homo sapiens GN=RERE PE=1 SV=1 - [B1AKN3_HUMAN]	6.95	2.93	3	1	3	3	1298	141.5	7.81
A8K8M5	Protein-serine/threonine kinase OS=Homo sapiens PE=2 SV=1 - [A8K8M5_HUMAN]	6.95	4.50	2	2	3	3	578	66.5	7.71
H7BZH1	Protein PRR14L (Fragment) OS=Homo sapiens GN=PRR14L PE=1 SV=1 - [H7BZH1_HUMAN]	6.94	6.37	2	2	3	3	675	74.6	9.01
P08709	Coagulation factor VII OS=Homo sapiens GN=F7 PE=1 SV=1 - [FA7_HUMAN]	6.94	5.15	4	1	2	3	466	51.6	7.23
B1AH90	Signal peptide, CUB and EGF-like domain-containing protein 1 OS=Homo sapiens GN=SCUBE1 PE=1 SV=1 - [B1AH90_HUMAN]	6.94	3.46	5	1	1	2	347	37.3	5.71
Q9NZC4	ETS homologous factor OS=Homo sapiens GN=EHF PE=2 SV=1 - [EHF_HUMAN]	6.94	9.00	1	1	2	3	300	34.9	7.30
G3V3E1	SKI family transcriptional corepressor 1 OS=Homo sapiens GN=SKOR1 PE=4 SV=1 - [G3V3E1_HUMAN]	6.93	5.08	3	2	3	3	926	95.7	6.40
Q8N1E2	Lysozyme g-like protein 1 OS=Homo sapiens GN=LYG1 PE=2 SV=1 - [LYG1_HUMAN]	6.93	13.40	1	3	3	4	194	21.4	8.16
Q53TS8	Amyotrophic lateral sclerosis 2 chromosomal region candidate gene 11 protein OS=Homo sapiens GN=ALS2CR11 PE=1 SV=1 - [AL2SA_HUMAN]	6.93	6.26	2	1	3	3	623	71.1	7.02
A0A024R914	Centrosomal protein 350kDa, isoform CRA_a OS=Homo sapiens GN=CEP350 PE=4 SV=1 - [A0A024R914_HUMAN]	6.93	1.67	5	1	3	3	3117	350.7	6.34
O95248	Myotubularin-related protein 5 OS=Homo sapiens GN=SBF1 PE=1 SV=3 - [MTMR5_HUMAN]	6.92	1.87	8	2	3	3	1867	208.2	6.90
B3KPV9	cDNA FLJ32326 fis, clone PROST2004332, highly similar to Brain-specific angiogenesis inhibitor1-associated protein 2 OS=Homo sapiens PE=2 SV=1 - [B3KPV9_HUMAN]	6.92	8.45	10	1	3	3	521	56.3	8.60
A0A024R8G4	ADAM metallopeptidase with thrombospondin type 1 motif, 13, isoform CRA_a OS=Homo sapiens GN=ADAMTS13 PE=4 SV=1 - [A0A024R8G4_HUMAN]	6.92	2.69	2	1	2	3	1041	112.4	7.31
F5H0N7	CAP-Gly domain-containing linker protein 1 OS=Homo sapiens GN=CLIP1 PE=1 SV=1 - [F5H0N7_HUMAN]	6.91	4.74	6	1	3	3	1013	116.2	5.15
Q9H822	cDNA FLJ13989 fis, clone Y79AA1002083, highly similar to H.sapiens MUF1 protein OS=Homo sapiens PE=2 SV=1 - [Q9H822_HUMAN]	6.91	12.50	1	1	2	3	216	23.6	11.11
Q9NZM1	Myoferlin OS=Homo sapiens GN=MYOF PE=1 SV=1 - [MYOF_HUMAN]	6.91	1.84	2	1	3	3	2061	234.6	6.18
Q59HB8	Nuclear mitotic apparatus protein 1 variant (Fragment) OS=Homo sapiens PE=2 SV=1 - [Q59HB8_HUMAN]	6.91	2.90	10	2	3	3	1585	178.0	6.33
C9JRT7	Kelch domain-containing protein 10 (Fragment) OS=Homo sapiens GN=KLHDC10 PE=1 SV=1 - [C9JRT7_HUMAN]	6.91	17.65	2	1	1	3	136	14.4	8.88
K7EKF6	Angiopoietin-related protein 6 OS=Homo sapiens GN=ANGPTL6 PE=1 SV=1 - [K7EKF6_HUMAN]	6.91	7.91	2	2	3	3	430	47.0	8.46
Q6ZU52	Uncharacterized protein KIAA0408 OS=Homo sapiens GN=KIAA0408 PE=1 SV=1 - [K0408_HUMAN]	6.91	4.47	2	1	3	3	694	79.1	8.35
F8WE26	Metaxin-2 OS=Homo sapiens GN=MTX2 PE=1 SV=1 - [F8WE26_HUMAN]	6.91	35.56	1	1	1	3	45	4.8	3.95
A0A0B4J1X5	Immunoglobulin heavy variable 3-74 OS=Homo sapiens GN=IGHV3-74 PE=3 SV=1 - [HV374_HUMAN]	6.91	22.22	68	1	2	3	117	12.8	8.66
R4GN62	Partitioning defective 3 homolog B OS=Homo sapiens GN=PARD3B PE=1 SV=1 - [R4GN62_HUMAN]	6.90	6.10	7	3	3	3	935	101.7	8.05
K7N7S0	CDC25 isoform A1-CAG OS=Homo sapiens PE=2 SV=1 - [K7N7S0_HUMAN]	6.90	5.35	6	1	2	3	523	58.9	6.95
H7C4V1	Uncharacterized protein C3orf30 (Fragment) OS=Homo sapiens GN=C3orf30 PE=1 SV=1 - [H7C4V1_HUMAN]	6.90	5.22	6	1	2	3	441	49.1	6.65
Q9NST9	Putative uncharacterized protein DKFZp434I0812 OS=Homo sapiens GN=DKFZp434I0812 PE=2 SV=1 - [Q9NST9_HUMAN]	6.90	11.11	3	1	2	3	117	13.3	5.36
D3DSR9	Tumor necrosis factor receptor superfamily, member 10b OS=Homo sapiens GN=TNFRSF10B PE=4 SV=1 - [D3DSR9_HUMAN]	6.89	9.98	10	2	3	3	411	45.1	5.66
Q86U86	Protein polybromo-1 OS=Homo sapiens GN=PBRM1 PE=1 SV=1 - [PB1_HUMAN]	6.89	2.43	4	2	3	3	1689	192.8	6.89
B4DQY7	cDNA FLJ51280, highly similar to TATA element modulatory factor (Fragment) OS=Homo sapiens PE=2 SV=1 - [B4DQY7_HUMAN]	6.89	6.85	4	3	3	3	992	111.7	4.87
Q0P6F0	LRRC56 protein OS=Homo sapiens GN=LRRC56 PE=2 SV=1 - [Q0P6F0_HUMAN]	6.89	7.07	3	1	2	3	467	50.0	7.17
Q6ZVF9	G protein-regulated inducer of neurite outgrowth 3 OS=Homo sapiens GN=GPRIN3 PE=2 SV=2 - [GRIN3_HUMAN]	6.89	3.99	3	1	2	3	776	82.4	7.56
Q13523	Serine/threonine-protein kinase PRP4 homolog OS=Homo sapiens GN=PRPF4B PE=1 SV=3 - [PRP4B_HUMAN]	6.88	3.48	4	1	3	3	1007	116.9	10.26
A0A0U1RR39	E3 ubiquitin-protein ligase CBL OS=Homo sapiens GN=CBL PE=1 SV=1 - [A0A0U1RR39_HUMAN]	6.88	6.61	4	3	3	3	862	95.0	6.40
Q5KU26	Collectin-12 OS=Homo sapiens GN=COLEC12 PE=1 SV=3 - [COL12_HUMAN]	6.88	4.04	1	2	3	3	742	81.5	5.69
I7FV90	Sterile alpha motif domain containing 11 splice variant ASV21 OS=Homo sapiens GN=SAMD11 PE=2 SV=1 - [I7FV90_HUMAN]	6.88	10.96	22	3	3	3	429	45.2	10.15
Q9UKA4	A-kinase anchor protein 11 OS=Homo sapiens GN=AKAP11 PE=1 SV=1 - [AKA11_HUMAN]	6.88	1.95	2	2	3	3	1901	210.4	5.39
B4DTY8	cDNA FLJ61587, highly similar to Integrin alpha-1 (Fragment) OS=Homo sapiens PE=2 SV=1 - [B4DTY8_HUMAN]	6.88	3.84	2	2	3	3	1173	129.9	6.18
P09327	Villin-1 OS=Homo sapiens GN=VIL1 PE=1 SV=4 - [VILI_HUMAN]	6.88	5.44	4	3	3	3	827	92.6	6.39
D6RAL1	Ribosome-releasing factor 2, mitochondrial (Fragment) OS=Homo sapiens GN=GFM2 PE=1 SV=1 - [D6RAL1_HUMAN]	6.88	4.21	3	1	1	3	285	31.9	7.74
B4DRF6	cDNA FLJ51591, highly similar to DNA replication licensing factor MCM6 (Fragment) OS=Homo sapiens PE=2 SV=1 - [B4DRF6_HUMAN]	6.88	10.68	1	2	3	3	440	49.5	5.19
Q75MT5	Putative uncharacterized protein RFC2 OS=Homo sapiens GN=RFC2 PE=2 SV=1 - [Q75MT5_HUMAN]	6.87	9.38	5	2	2	3	320	35.2	5.54
B4DF22	cDNA FLJ55615, highly similar to SWI/SNF-related matrix-associatedactin-dependent regulator of chromatin subfamily C member 2 OS=Homo sapiens PE=2 SV=1 - [B4DF22_HUMAN]	6.87	3.73	4	1	3	3	1019	112.1	5.29
E9PIH6	EH domain-binding protein 1-like protein 1 (Fragment) OS=Homo sapiens GN=EHBP1L1 PE=1 SV=1 - [E9PIH6_HUMAN]	6.87	5.52	3	3	3	3	670	71.6	5.81
Q59EA4	Phospholipase D1 variant (Fragment) OS=Homo sapiens PE=2 SV=1 - [Q59EA4_HUMAN]	6.87	2.46	4	2	2	3	1059	121.9	8.75
B4DIV5	cDNA FLJ59297, weakly similar to Loss of heterozygosity 11 chromosomal region 2gene A protein homolog (Fragment) OS=Homo sapiens PE=2 SV=1 - [B4DIV5_HUMAN]	6.87	2.89	2	1	2	3	1107	122.0	8.28
O15020	Spectrin beta chain, non-erythrocytic 2 OS=Homo sapiens GN=SPTBN2 PE=1 SV=3 - [SPTN2_HUMAN]	6.86	1.72	2	1	3	3	2390	271.2	6.11
O75335	Liprin-alpha-4 OS=Homo sapiens GN=PPFIA4 PE=2 SV=3 - [LIPA4_HUMAN]	6.86	1.86	3	2	2	3	1185	134.3	6.74
Q6AWC2	Protein WWC2 OS=Homo sapiens GN=WWC2 PE=1 SV=2 - [WWC2_HUMAN]	6.86	2.68	2	1	3	3	1192	133.8	5.53
A0A140T902	Tenascin-X OS=Homo sapiens GN=TNXB PE=1 SV=1 - [A0A140T902_HUMAN]	6.85	0.90	15	1	3	3	4222	455.9	5.20
Q9HBI1	Beta-parvin OS=Homo sapiens GN=PARVB PE=1 SV=1 - [PARVB_HUMAN]	6.85	12.09	3	3	3	3	364	41.7	6.73
Q587I9	Vesicle transport protein SFT2C OS=Homo sapiens GN=SFT2D3 PE=2 SV=1 - [SFT2C_HUMAN]	6.85	8.37	1	1	1	3	215	21.8	9.89
Q5VWT5	Uncharacterized protein C1orf168 OS=Homo sapiens GN=C1orf168 PE=2 SV=1 - [CA168_HUMAN]	6.84	4.95	1	2	3	3	728	82.0	8.38
O15516	Circadian locomoter output cycles protein kaput OS=Homo sapiens GN=CLOCK PE=1 SV=1 - [CLOCK_HUMAN]	6.84	2.84	3	2	2	3	846	95.2	7.01
B2RDY3	Katanin p60 ATPase-containing subunit A-like 1 OS=Homo sapiens GN=KATNAL1 PE=2 SV=1 - [B2RDY3_HUMAN]	6.84	5.10	3	1	2	3	490	55.4	7.02
A0A024RAB6	Heparan sulfate proteoglycan 2 (Perlecan), isoform CRA_b OS=Homo sapiens GN=HSPG2 PE=4 SV=1 - [A0A024RAB6_HUMAN]	6.84	0.62	3	1	2	3	4346	463.7	6.51
Q96Q04	Serine/threonine-protein kinase LMTK3 OS=Homo sapiens GN=LMTK3 PE=1 SV=2 - [LMTK3_HUMAN]	6.84	2.67	2	2	3	3	1460	153.6	4.86
Q7RTS7	Keratin, type II cytoskeletal 74 OS=Homo sapiens GN=KRT74 PE=1 SV=2 - [K2C74_HUMAN]	6.83	4.91	2	1	2	3	529	57.8	7.71
H0Y7V4	Dynein heavy chain 8, axonemal OS=Homo sapiens GN=DNAH8 PE=1 SV=1 - [H0Y7V4_HUMAN]	6.83	0.67	3	3	3	3	4188	478.6	6.11
B7Z7H2	cDNA FLJ58079, highly similar to Homo sapiens SH3 multiple domains 1 (SH3MD1), mRNA OS=Homo sapiens PE=2 SV=1 - [B7Z7H2_HUMAN]	6.82	3.83	9	2	3	3	965	106.3	8.44
O00507	Probable ubiquitin carboxyl-terminal hydrolase FAF-Y OS=Homo sapiens GN=USP9Y PE=2 SV=2 - [USP9Y_HUMAN]	6.82	1.02	1	1	2	3	2555	290.9	5.86
I3L2C0	Active breakpoint cluster region-related protein OS=Homo sapiens GN=ABR PE=1 SV=1 - [I3L2C0_HUMAN]	6.82	10.46	1	2	2	3	153	17.4	10.81
B3KU93	cDNA FLJ39390 fis, clone PLACE6004219, highly similar to Puromycin-sensitive aminopeptidase OS=Homo sapiens PE=2 SV=1 - [B3KU93_HUMAN]	6.82	5.56	8	3	3	3	756	85.2	5.26
E9PRV7	Protein-serine/threonine kinase OS=Homo sapiens GN=GRK2 PE=1 SV=1 - [E9PRV7_HUMAN]	6.82	5.39	6	2	2	4	408	46.5	7.81
D3DSV6	Testis expressed sequence 15, isoform CRA_a OS=Homo sapiens GN=TEX15 PE=4 SV=1 - [D3DSV6_HUMAN]	6.82	1.24	3	1	3	3	3069	346.4	6.34
Q9H0B3	Uncharacterized protein KIAA1683 OS=Homo sapiens GN=KIAA1683 PE=1 SV=1 - [K1683_HUMAN]	6.81	2.29	2	1	3	3	1180	127.6	10.23
Q8N961	Ankyrin repeat and BTB/POZ domain-containing protein 2 OS=Homo sapiens GN=ABTB2 PE=2 SV=2 - [ABTB2_HUMAN]	6.81	3.90	1	1	3	3	1025	113.6	6.29
Q6ZMI0	Protein phosphatase 1 regulatory subunit 21 OS=Homo sapiens GN=PPP1R21 PE=1 SV=1 - [PPR21_HUMAN]	6.81	3.21	1	1	2	3	780	88.3	6.84
B7Z7F2	cDNA FLJ53518, highly similar to Protein O-linked-mannosebeta-1,2-N-acetylglucosaminyltransferase 1 (EC 2.4.1.-) OS=Homo sapiens PE=2 SV=1 - [B7Z7F2_HUMAN]	6.81	6.96	4	1	2	3	517	58.7	6.23
B3KMZ0	cDNA FLJ12979 fis, clone NT2RP2006334, highly similar to WD repeat domain phosphoinositide-interacting protein 2 OS=Homo sapiens PE=2 SV=1 - [B3KMZ0_HUMAN]	6.81	3.52	2	1	1	3	454	49.4	6.46
Q86UR5	Regulating synaptic membrane exocytosis protein 1 OS=Homo sapiens GN=RIMS1 PE=1 SV=1 - [RIMS1_HUMAN]	6.80	2.07	6	1	3	3	1692	189.0	9.66
O75164	Lysine-specific demethylase 4A OS=Homo sapiens GN=KDM4A PE=1 SV=2 - [KDM4A_HUMAN]	6.80	3.48	9	2	3	3	1064	120.6	5.85
Q658M3	Putative uncharacterized protein DKFZp666H126 (Fragment) OS=Homo sapiens GN=DKFZp666H126 PE=2 SV=1 - [Q658M3_HUMAN]	6.80	8.33	7	2	3	3	396	45.5	7.97
Q7Z6G8	Ankyrin repeat and sterile alpha motif domain-containing protein 1B OS=Homo sapiens GN=ANKS1B PE=1 SV=2 - [ANS1B_HUMAN]	6.79	3.61	3	1	3	3	1248	138.0	6.37
B4DUF3	cDNA FLJ59239, highly similar to MAGUK p55 subfamily member 4 OS=Homo sapiens PE=2 SV=1 - [B4DUF3_HUMAN]	6.79	7.47	9	1	3	3	562	64.3	6.99
A0A024R652	Methylenetetrahydrofolate dehydrogenase (NADP+ dependent) 1, methenyltetrahydrofolate cyclohydrolase, formyltetrahydrofolate synthetase, isoform CRA_a OS=Homo sapiens GN=MTHFD1 PE=3 SV=1 - [A0A024R652_HUMAN]	6.79	2.89	4	2	2	3	935	101.5	7.18
Q75RY1	Growth differentiation factor 7 OS=Homo sapiens GN=gdf7 PE=2 SV=1 - [Q75RY1_HUMAN]	6.79	5.30	1	1	1	3	453	47.1	9.80
Q6ZWG8	cDNA FLJ41116 fis, clone BRACE1000572 OS=Homo sapiens PE=2 SV=1 - [Q6ZWG8_HUMAN]	6.78	13.87	1	2	3	3	1139	131.1	13.96
B4DV29	cDNA FLJ57203, moderately similar to Adrenal medulla 50 kDa protein OS=Homo sapiens PE=2 SV=1 - [B4DV29_HUMAN]	6.78	9.25	5	2	2	3	335	37.4	5.12
A0A0A0MRP0	MAP7 domain-containing protein 3 (Fragment) OS=Homo sapiens GN=MAP7D3 PE=1 SV=1 - [A0A0A0MRP0_HUMAN]	6.78	6.48	2	3	3	3	802	90.1	9.29
Q9Y490	Talin-1 OS=Homo sapiens GN=TLN1 PE=1 SV=3 - [TLN1_HUMAN]	6.78	1.38	1	3	3	3	2541	269.6	6.07
E9PLR8	N-acetylated-alpha-linked acidic dipeptidase-like protein (Fragment) OS=Homo sapiens GN=NAALADL1 PE=4 SV=1 - [E9PLR8_HUMAN]	6.78	44.26	10	2	2	3	61	6.9	7.18
O60245	Protocadherin-7 OS=Homo sapiens GN=PCDH7 PE=1 SV=2 - [PCDH7_HUMAN]	6.78	3.74	1	1	3	3	1069	116.0	5.19
Q8TDD1	ATP-dependent RNA helicase DDX54 OS=Homo sapiens GN=DDX54 PE=1 SV=2 - [DDX54_HUMAN]	6.78	3.86	2	1	2	3	881	98.5	10.02
Q9HCI5	Melanoma-associated antigen E1 OS=Homo sapiens GN=MAGEE1 PE=1 SV=2 - [MAGE1_HUMAN]	6.78	2.93	1	2	2	3	957	103.2	5.33
B3KP69	cDNA FLJ31267 fis, clone KIDNE2006053, highly similar to Glycosyltransferase-like protein LARGE2 (EC 2.4.-.-) OS=Homo sapiens PE=2 SV=1 - [B3KP69_HUMAN]	6.78	6.52	3	1	3	3	690	78.6	7.55
B4DDR8	Mediator of RNA polymerase II transcription subunit 24 OS=Homo sapiens GN=MED24 PE=1 SV=1 - [B4DDR8_HUMAN]	6.78	5.80	10	1	2	3	638	70.7	6.27
B4DTE2	cDNA FLJ53189, highly similar to Homo sapiens Rho guanine nucleotide exchange factor (GEF) 10-like, transcript variant 1, mRNA OS=Homo sapiens PE=2 SV=1 - [B4DTE2_HUMAN]	6.78	4.10	3	1	2	3	488	55.1	8.90
B4DXS3	Armadillo repeat-containing protein 3 OS=Homo sapiens GN=ARMC3 PE=1 SV=1 - [B4DXS3_HUMAN]	6.77	3.78	1	1	2	3	609	66.9	7.42
Q9H2F5	Enhancer of polycomb homolog 1 OS=Homo sapiens GN=EPC1 PE=1 SV=1 - [EPC1_HUMAN]	6.77	3.83	3	1	2	3	836	93.4	8.59
B4DRK0	cDNA FLJ50840, highly similar to Ribosomal protein S6 kinase delta-1 (EC 2.7.11.1) OS=Homo sapiens PE=2 SV=1 - [B4DRK0_HUMAN]	6.77	4.80	6	2	3	3	854	94.4	4.77
Q96KG7	Multiple epidermal growth factor-like domains protein 10 OS=Homo sapiens GN=MEGF10 PE=1 SV=1 - [MEG10_HUMAN]	6.77	2.81	1	2	2	3	1140	122.1	6.87
Q9HB00	Desmocollin 1, isoform CRA_b OS=Homo sapiens GN=DSC1 PE=4 SV=1 - [Q9HB00_HUMAN]	6.77	2.74	2	1	2	2	840	93.8	5.53
I3L1J2	Cadherin-5 OS=Homo sapiens GN=CDH5 PE=1 SV=1 - [I3L1J2_HUMAN]	6.76	14.78	8	2	3	3	406	45.4	5.69
A0JLU5	ESF1 protein (Fragment) OS=Homo sapiens GN=ESF1 PE=2 SV=1 - [A0JLU5_HUMAN]	6.76	10.14	5	3	3	3	552	63.4	4.73
Q6ZRK6	Coiled-coil domain-containing protein 73 OS=Homo sapiens GN=CCDC73 PE=2 SV=2 - [CCD73_HUMAN]	6.76	2.22	1	1	2	3	1079	124.1	5.58
Q70EL1	Inactive ubiquitin carboxyl-terminal hydrolase 54 OS=Homo sapiens GN=USP54 PE=1 SV=4 - [UBP54_HUMAN]	6.76	2.91	8	3	3	3	1684	187.3	7.28
O00443	Phosphatidylinositol 4-phosphate 3-kinase C2 domain-containing subunit alpha OS=Homo sapiens GN=PIK3C2A PE=1 SV=2 - [P3C2A_HUMAN]	6.76	2.43	4	3	3	3	1686	190.6	8.02
Q15464	SH2 domain-containing adapter protein B OS=Homo sapiens GN=SHB PE=1 SV=2 - [SHB_HUMAN]	6.75	8.64	1	1	3	3	509	55.0	8.90
Q12802	A-kinase anchor protein 13 OS=Homo sapiens GN=AKAP13 PE=1 SV=2 - [AKP13_HUMAN]	6.75	1.53	8	3	3	3	2813	307.4	5.24
Q8NDA2	Hemicentin-2 OS=Homo sapiens GN=HMCN2 PE=2 SV=3 - [HMCN2_HUMAN]	6.75	0.87	2	2	3	3	5059	541.6	5.87
Q86YS3	Rab11 family-interacting protein 4 OS=Homo sapiens GN=RAB11FIP4 PE=1 SV=1 - [RFIP4_HUMAN]	6.75	3.30	4	2	2	3	637	71.9	4.87
D3DT96	Integrator complex subunit 7, isoform CRA_a OS=Homo sapiens GN=INTS7 PE=4 SV=1 - [D3DT96_HUMAN]	6.75	3.46	3	2	2	3	694	76.4	8.32
A6NNW6	Enolase 4 OS=Homo sapiens GN=ENO4 PE=2 SV=2 - [ENO4_HUMAN]	6.74	1.75	1	1	1	5	628	68.8	6.00
P35227	Polycomb group RING finger protein 2 OS=Homo sapiens GN=PCGF2 PE=1 SV=1 - [PCGF2_HUMAN]	6.74	3.49	1	1	1	3	344	37.8	7.96
M0R3E1	Zinc finger protein 334 (Fragment) OS=Homo sapiens GN=ZNF334 PE=4 SV=1 - [M0R3E1_HUMAN]	6.74	13.29	7	2	2	3	173	20.0	8.97
Q92621	Nuclear pore complex protein Nup205 OS=Homo sapiens GN=NUP205 PE=1 SV=3 - [NU205_HUMAN]	6.73	2.14	4	2	3	3	2012	227.8	6.19
Q96JR7	PRO0633 OS=Homo sapiens PE=2 SV=1 - [Q96JR7_HUMAN]	6.73	25.00	1	1	2	3	56	6.5	9.61
Q6T4P5	Phospholipid phosphatase-related protein type 3 OS=Homo sapiens GN=PLPPR3 PE=2 SV=1 - [PLPR3_HUMAN]	6.73	5.43	1	1	3	3	718	76.0	5.97
Q05CN5	MAP9 protein (Fragment) OS=Homo sapiens GN=MAP9 PE=2 SV=1 - [Q05CN5_HUMAN]	6.73	4.54	7	2	2	3	441	49.2	5.69
Q9UKX2	Myosin-2 OS=Homo sapiens GN=MYH2 PE=1 SV=1 - [MYH2_HUMAN]	6.73	1.80	2	3	3	3	1941	222.9	5.82
B4DXV9	cDNA FLJ53678 OS=Homo sapiens PE=2 SV=1 - [B4DXV9_HUMAN]	6.73	7.97	8	1	3	3	414	46.1	8.84
B4E0K9	Alpha-mannosidase OS=Homo sapiens PE=2 SV=1 - [B4E0K9_HUMAN]	6.73	4.63	5	3	3	3	950	107.4	7.02
K7EJ76	Putative Polycomb group protein ASXL3 OS=Homo sapiens GN=ASXL3 PE=4 SV=1 - [K7EJ76_HUMAN]	6.73	8.49	2	1	3	4	318	35.1	9.01
B4DIA2	cDNA FLJ54473, highly similar to Coiled-coil alpha-helical rod protein 1 OS=Homo sapiens PE=2 SV=1 - [B4DIA2_HUMAN]	6.73	4.82	64	2	3	3	768	87.0	5.86
Q9UMD9	Collagen alpha-1(XVII) chain OS=Homo sapiens GN=COL17A1 PE=1 SV=3 - [COHA1_HUMAN]	6.72	3.21	4	3	3	3	1497	150.3	8.79
Q6P0Q8	Microtubule-associated serine/threonine-protein kinase 2 OS=Homo sapiens GN=MAST2 PE=1 SV=2 - [MAST2_HUMAN]	6.72	2.28	5	2	3	3	1798	196.3	8.16
A0A087WV20	Alstrom syndrome protein 1 OS=Homo sapiens GN=ALMS1 PE=1 SV=1 - [A0A087WV20_HUMAN]	6.72	0.93	6	1	3	3	3859	425.0	5.99
H7C002	Cilia- and flagella-associated protein 69 (Fragment) OS=Homo sapiens GN=CFAP69 PE=4 SV=1 - [H7C002_HUMAN]	6.71	2.72	2	1	1	3	515	58.2	6.35
Q12789	General transcription factor 3C polypeptide 1 OS=Homo sapiens GN=GTF3C1 PE=1 SV=4 - [TF3C1_HUMAN]	6.71	0.95	3	1	2	3	2109	238.7	7.30
A0A024R6Q8	Bromodomain containing 7, isoform CRA_b OS=Homo sapiens GN=BRD7 PE=4 SV=1 - [A0A024R6Q8_HUMAN]	6.71	10.24	3	3	3	3	508	57.4	5.25
H7BY33	Coiled-coil domain-containing protein 88B OS=Homo sapiens GN=CCDC88B PE=1 SV=1 - [H7BY33_HUMAN]	6.71	5.48	1	1	3	3	712	80.6	7.85
C4AM88	Cytosolic 5'-nucleotidase 1B OS=Homo sapiens GN=NT5C1B PE=4 SV=2 - [C4AM88_HUMAN]	6.71	16.75	2	1	2	3	203	21.9	11.78
G3V342	Unconventional myosin-Ia OS=Homo sapiens GN=MYO1A PE=1 SV=1 - [G3V342_HUMAN]	6.71	4.36	5	1	2	3	688	78.8	9.33
A0A096LNW1	Transcriptional regulator ATRX (Fragment) OS=Homo sapiens GN=ATRX PE=1 SV=1 - [A0A096LNW1_HUMAN]	6.71	4.82	5	1	3	3	954	106.9	6.47
H7C3Y7	Neurobeachin-like protein 2 (Fragment) OS=Homo sapiens GN=NBEAL2 PE=1 SV=1 - [H7C3Y7_HUMAN]	6.71	1.92	5	1	2	3	1093	121.6	6.28
B4DKC3	cDNA FLJ53350, highly similar to Brain-specific angiogenesis inhibitor 2 OS=Homo sapiens PE=2 SV=1 - [B4DKC3_HUMAN]	6.71	3.66	10	3	3	3	1175	129.1	8.19
B4DI25	cDNA FLJ51856, highly similar to Apoptosis-stimulating of p53 protein 2 OS=Homo sapiens PE=2 SV=1 - [B4DI25_HUMAN]	6.70	5.12	6	3	3	3	723	78.6	5.01
Q93100	Phosphorylase b kinase regulatory subunit beta OS=Homo sapiens GN=PHKB PE=1 SV=3 - [KPBB_HUMAN]	6.70	4.12	3	2	3	3	1093	124.8	6.95
F8VZA0	Pseudouridylate synthase 7 homolog-like protein OS=Homo sapiens GN=PUS7L PE=1 SV=1 - [F8VZA0_HUMAN]	6.70	12.33	4	1	3	3	365	41.9	7.28
D5MRH1	Large-conductance calcium-activated potassium channel alpha subunit OS=Homo sapiens GN=KCNMA1 PE=2 SV=1 - [D5MRH1_HUMAN]	6.70	3.37	13	0	3	3	1128	125.8	7.30
Q6P4F7	Rho GTPase-activating protein 11A OS=Homo sapiens GN=ARHGAP11A PE=1 SV=2 - [RHGBA_HUMAN]	6.70	4.50	3	2	3	3	1023	113.8	9.07
H7C0Q6	E3 ubiquitin-protein ligase TRIM4 (Fragment) OS=Homo sapiens GN=TRIM4 PE=1 SV=1 - [H7C0Q6_HUMAN]	6.69	13.37	4	2	2	3	202	23.5	7.44
Q14215	Nebulin (Fragment) OS=Homo sapiens PE=2 SV=1 - [Q14215_HUMAN]	6.69	1.33	2	1	3	3	3007	348.8	9.10
G3V167	Poly [ADP-ribose] polymerase OS=Homo sapiens GN=PARP2 PE=1 SV=1 - [G3V167_HUMAN]	6.69	7.72	5	3	3	3	531	60.2	8.91
A0A024R674	Spectrin beta chain OS=Homo sapiens GN=SPTB PE=3 SV=1 - [A0A024R674_HUMAN]	6.68	2.49	8	1	3	3	2328	267.6	5.36
B3KML1	cDNA FLJ11308 fis, clone PLACE1010074, highly similar to Sorting nexin-2 OS=Homo sapiens PE=2 SV=1 - [B3KML1_HUMAN]	6.68	2.89	4	2	2	4	519	58.4	5.06
Q9UPR0	Inactive phospholipase C-like protein 2 OS=Homo sapiens GN=PLCL2 PE=1 SV=2 - [PLCL2_HUMAN]	6.68	2.57	1	1	2	3	1127	125.8	6.90
Q14204	Cytoplasmic dynein 1 heavy chain 1 OS=Homo sapiens GN=DYNC1H1 PE=1 SV=5 - [DYHC1_HUMAN]	6.67	0.75	2	3	3	3	4646	532.1	6.40
Q53HD3	Ribosomal protein L18a variant (Fragment) OS=Homo sapiens PE=2 SV=1 - [Q53HD3_HUMAN]	6.67	21.59	12	3	3	3	176	20.7	10.71
C9J0Y7	F-box/LRR-repeat protein 3 (Fragment) OS=Homo sapiens GN=FBXL3 PE=1 SV=1 - [C9J0Y7_HUMAN]	6.67	3.32	2	1	1	3	241	26.8	7.28
P98169	Zinc finger X-linked protein ZXDB OS=Homo sapiens GN=ZXDB PE=2 SV=2 - [ZXDB_HUMAN]	6.67	5.73	3	2	3	3	803	84.7	6.92
Q8N9S5	cDNA FLJ36608 fis, clone TRACH2015824 OS=Homo sapiens PE=2 SV=1 - [Q8N9S5_HUMAN]	6.67	17.22	1	2	2	3	180	20.4	11.65
Q9UI73	PRO0246 OS=Homo sapiens PE=2 SV=1 - [Q9UI73_HUMAN]	6.67	33.33	1	3	3	3	75	8.8	11.09
A0A0J9YY34	NHS-like protein 2 OS=Homo sapiens GN=NHSL2 PE=1 SV=1 - [A0A0J9YY34_HUMAN]	6.67	3.18	4	1	3	3	1225	133.2	7.77
A6NKT7	RanBP2-like and GRIP domain-containing protein 3 OS=Homo sapiens GN=RGPD3 PE=4 SV=2 - [RGPD3_HUMAN]	6.67	2.39	13	2	3	3	1758	197.4	6.33
A0A0A0MTC7	Laminin subunit alpha-4 OS=Homo sapiens GN=LAMA4 PE=1 SV=1 - [A0A0A0MTC7_HUMAN]	6.67	2.31	5	1	3	3	1816	201.7	6.29
Q495X7	Tripartite motif-containing protein 60 OS=Homo sapiens GN=TRIM60 PE=2 SV=2 - [TRI60_HUMAN]	6.67	4.88	1	2	2	3	471	55.1	8.34
Q6ZU15	Septin-14 OS=Homo sapiens GN=SEPT14 PE=1 SV=2 - [SEP14_HUMAN]	6.67	9.03	3	2	3	3	432	50.0	6.24
H0Y901	Ladinin-1 (Fragment) OS=Homo sapiens GN=LAD1 PE=1 SV=1 - [H0Y901_HUMAN]	6.66	18.75	2	2	3	3	192	21.5	9.92
B3KW11	cDNA FLJ41865 fis, clone OCBBF2004826, highly similar to Homo sapiens T-cell lymphoma invasion and metastasis 2 (TIAM2), transcript variant 1, mRNA (Fragment) OS=Homo sapiens PE=2 SV=1 - [B3KW11_HUMAN]	6.66	3.51	8	3	3	3	1367	152.9	7.14
C9JT67	Coiled-coil domain-containing protein 144A OS=Homo sapiens GN=CCDC144A PE=4 SV=1 - [C9JT67_HUMAN]	6.66	2.81	4	1	3	3	1425	165.0	5.38
A8K134	cDNA FLJ75245, highly similar to Homo sapiens carbamoyl-phosphate synthetase 1, mitochondrial (CPS1), mRNA OS=Homo sapiens PE=2 SV=1 - [A8K134_HUMAN]	6.66	2.80	8	2	3	3	1500	164.8	6.73
A0A024RAC6	Elongin-A OS=Homo sapiens GN=TCEB3 PE=1 SV=1 - [A0A024RAC6_HUMAN]	6.66	5.96	2	2	3	3	772	87.2	9.57
Q4KWH8	1-phosphatidylinositol 4,5-bisphosphate phosphodiesterase eta-1 OS=Homo sapiens GN=PLCH1 PE=1 SV=1 - [PLCH1_HUMAN]	6.66	2.54	1	3	3	3	1693	189.1	7.74
O75578	Integrin alpha-10 OS=Homo sapiens GN=ITGA10 PE=2 SV=2 - [ITA10_HUMAN]	6.66	2.23	1	1	2	3	1167	127.5	6.68
B4DZC9	cDNA FLJ61681, highly similar to STE20-like serine/threonine-protein kinase (EC2.7.11.1) (Fragment) OS=Homo sapiens PE=2 SV=1 - [B4DZC9_HUMAN]	6.66	3.82	2	1	3	3	1048	119.8	4.91
B2RDB1	cDNA, FLJ96533, highly similar to Homo sapiens golgi coiled-coil 1 (GCC1), mRNA OS=Homo sapiens PE=2 SV=1 - [B2RDB1_HUMAN]	6.65	4.65	3	3	3	3	775	87.7	5.45
Q14993	Collagen alpha-1(XIX) chain OS=Homo sapiens GN=COL19A1 PE=1 SV=3 - [COJA1_HUMAN]	6.65	4.99	1	2	3	3	1142	115.1	8.32
Q5T890	DNA excision repair protein ERCC-6-like 2 OS=Homo sapiens GN=ERCC6L2 PE=1 SV=2 - [ER6L2_HUMAN]	6.65	3.33	5	3	3	3	1561	177.0	8.60
B7ZMH1	KIAA1211 protein OS=Homo sapiens GN=KIAA1211 PE=2 SV=1 - [B7ZMH1_HUMAN]	6.65	2.25	7	1	2	3	1202	133.6	5.63
Q08188	Protein-glutamine gamma-glutamyltransferase E OS=Homo sapiens GN=TGM3 PE=1 SV=4 - [TGM3_HUMAN]	6.65	5.77	3	1	3	3	693	76.6	5.86
Q9ULT6	E3 ubiquitin-protein ligase ZNRF3 OS=Homo sapiens GN=ZNRF3 PE=1 SV=3 - [ZNRF3_HUMAN]	6.65	2.67	2	2	2	3	936	100.5	7.84
Q8TE87	cDNA FLJ23801 fis, clone HEP22544 OS=Homo sapiens PE=2 SV=1 - [Q8TE87_HUMAN]	6.64	18.28	1	2	2	3	186	19.5	11.71
O43245	Protein p65 OS=Homo sapiens GN=p65 PE=2 SV=2 - [O43245_HUMAN]	6.64	4.23	2	1	2	3	614	68.6	9.61
Q6ZTR5	Cilia- and flagella-associated protein 47 OS=Homo sapiens GN=CFAP47 PE=2 SV=4 - [CFA47_HUMAN]	6.63	0.45	2	1	1	3	3102	351.7	7.40
Q5T0V0	Slit homolog 1 protein OS=Homo sapiens GN=SLIT1 PE=1 SV=1 - [Q5T0V0_HUMAN]	6.63	2.60	8	2	3	3	1461	159.6	6.80
A0A126LAZ1	U44 OS=Homo sapiens GN=U44 PE=4 SV=1 - [A0A126LAZ1_HUMAN]	6.62	6.34	1	1	1	3	205	23.4	4.97
H0Y349	Serine/threonine-protein kinase 32C OS=Homo sapiens GN=STK32C PE=4 SV=2 - [H0Y349_HUMAN]	6.62	15.07	1	1	1	3	146	15.1	11.47
Q9H0K1	Serine/threonine-protein kinase SIK2 OS=Homo sapiens GN=SIK2 PE=1 SV=1 - [SIK2_HUMAN]	6.61	3.02	1	2	2	3	926	103.8	6.02
A0A087WU05	C-Maf-inducing protein OS=Homo sapiens GN=CMIP PE=1 SV=1 - [A0A087WU05_HUMAN]	6.61	4.10	4	2	2	3	586	65.2	5.94
A4D237	Similar to polycystic kidney disease 1-like 3 OS=Homo sapiens GN=LOC393078 PE=4 SV=1 - [A4D237_HUMAN]	6.61	4.81	2	1	2	3	437	48.1	11.78
B4DM84	cDNA FLJ60694, highly similar to Deubiquitinating protein VCIP135 (EC 3.4.22.-) OS=Homo sapiens PE=2 SV=1 - [B4DM84_HUMAN]	6.61	6.42	2	3	3	3	779	86.1	7.99
P09341	Growth-regulated alpha protein OS=Homo sapiens GN=CXCL1 PE=1 SV=1 - [GROA_HUMAN]	6.61	11.21	1	2	2	3	107	11.3	10.43
B0QYQ6	Kazrin (Fragment) OS=Homo sapiens GN=KAZN PE=1 SV=1 - [B0QYQ6_HUMAN]	6.61	6.02	4	1	1	3	166	19.2	8.27
P02792	Ferritin light chain OS=Homo sapiens GN=FTL PE=1 SV=2 - [FRIL_HUMAN]	6.61	24.57	6	2	3	4	175	20.0	5.78
P78367	Homeobox protein Nkx-3.2 OS=Homo sapiens GN=NKX3-2 PE=2 SV=2 - [NKX32_HUMAN]	6.61	4.50	1	1	2	3	333	34.8	7.93
B4DZX0	cDNA FLJ52898, highly similar to Nucleobindin-1 OS=Homo sapiens PE=2 SV=1 - [B4DZX0_HUMAN]	6.60	7.48	7	2	2	3	441	51.6	5.31
A6H8W8	Intersectin 2 OS=Homo sapiens GN=ITSN2 PE=2 SV=1 - [A6H8W8_HUMAN]	6.60	1.98	8	2	3	3	1669	190.2	8.18
B2RAT9	cDNA, FLJ95107 OS=Homo sapiens PE=2 SV=1 - [B2RAT9_HUMAN]	6.60	4.44	3	2	2	3	518	59.9	7.31
A8K8P1	cDNA FLJ78752, highly similar to Homo sapiens centromere protein J (CENPJ), mRNA OS=Homo sapiens PE=2 SV=1 - [A8K8P1_HUMAN]	6.60	3.51	6	3	3	3	1338	152.9	6.61
Q5JTC6	APC membrane recruitment protein 1 OS=Homo sapiens GN=AMER1 PE=1 SV=2 - [AMER1_HUMAN]	6.60	2.11	1	2	2	3	1135	124.0	4.84
A0A024R1R7	Protein interacting with PRKCA 1, isoform CRA_b OS=Homo sapiens GN=PICK1 PE=4 SV=1 - [A0A024R1R7_HUMAN]	6.60	11.26	8	1	3	3	364	39.8	7.75
B3KT98	cDNA FLJ37915 fis, clone CTONG1000093, highly similar to Homo sapiens armadillo repeat containing 2 (ARMC2), mRNA OS=Homo sapiens PE=2 SV=1 - [B3KT98_HUMAN]	6.60	3.11	2	2	2	3	867	96.8	8.24
Q3ZCT8	Kelch repeat and BTB domain-containing protein 12 OS=Homo sapiens GN=KBTBD12 PE=2 SV=2 - [KBTBC_HUMAN]	6.60	5.14	3	1	3	3	623	71.1	5.99
A0A024R3R7	HEAT repeat containing 1, isoform CRA_b OS=Homo sapiens GN=HEATR1 PE=4 SV=1 - [A0A024R3R7_HUMAN]	6.59	1.47	5	2	2	3	2036	230.4	6.18
Q8TDB4	Protein MGARP OS=Homo sapiens GN=MGARP PE=1 SV=1 - [HUMMR_HUMAN]	6.59	5.42	1	1	1	3	240	25.4	4.44
P78524	Suppression of tumorigenicity 5 protein OS=Homo sapiens GN=ST5 PE=1 SV=3 - [ST5_HUMAN]	6.59	2.29	2	1	2	3	1137	126.4	9.25
Q8WXD2	Secretogranin-3 OS=Homo sapiens GN=SCG3 PE=1 SV=3 - [SCG3_HUMAN]	6.59	5.34	1	2	2	3	468	53.0	5.03
B3KTF7	cDNA FLJ38176 fis, clone FCBBF1000077, highly similar to Exocyst complex component 4 OS=Homo sapiens PE=2 SV=1 - [B3KTF7_HUMAN]	6.59	6.34	7	2	3	3	584	65.8	7.30
P12036	Neurofilament heavy polypeptide OS=Homo sapiens GN=NEFH PE=1 SV=4 - [NFH_HUMAN]	6.59	1.17	1	1	1	3	1026	112.4	6.18
A0A167RN11	MHC class I antigen (Fragment) OS=Homo sapiens GN=HLA-A PE=3 SV=1 - [A0A167RN11_HUMAN]	6.58	7.69	267	1	2	3	273	31.6	5.80
Q6ZP31	cDNA FLJ26619 fis, clone MPB09660 OS=Homo sapiens PE=2 SV=1 - [Q6ZP31_HUMAN]	6.58	10.27	1	1	2	3	370	39.3	11.27
A0A087X0F1	Protein TASOR OS=Homo sapiens GN=FAM208A PE=1 SV=1 - [A0A087X0F1_HUMAN]	6.58	4.54	2	1	3	3	1035	117.2	5.26
Q8NCU4	Coiled-coil domain-containing protein 191 OS=Homo sapiens GN=CCDC191 PE=2 SV=1 - [CC191_HUMAN]	6.58	3.85	1	2	3	3	936	110.5	9.60
Q9BY89	Uncharacterized protein KIAA1671 OS=Homo sapiens GN=KIAA1671 PE=1 SV=2 - [K1671_HUMAN]	6.58	2.88	1	2	3	3	1806	196.6	8.47
Q96SL1	Disrupted in renal carcinoma protein 2 OS=Homo sapiens GN=DIRC2 PE=1 SV=1 - [DIRC2_HUMAN]	6.57	5.44	2	1	2	3	478	52.1	8.47
M0R2J8	Doublecortin domain-containing protein 1 OS=Homo sapiens GN=DCDC1 PE=4 SV=1 - [M0R2J8_HUMAN]	6.57	2.58	4	2	3	3	1783	200.5	8.90
Q68DK2	Zinc finger FYVE domain-containing protein 26 OS=Homo sapiens GN=ZFYVE26 PE=1 SV=3 - [ZFY26_HUMAN]	6.57	1.14	3	1	2	3	2539	284.4	6.39
Q8N9D7	cDNA FLJ37680 fis, clone BRHIP2012923, highly similar to FOCAL ADHESION KINASE 1 (EC 2.7.1.112) OS=Homo sapiens PE=2 SV=1 - [Q8N9D7_HUMAN]	6.56	5.42	20	3	3	3	720	81.0	6.20
B4DNJ0	cDNA FLJ60734, highly similar to Collagen alpha-2(V) chain OS=Homo sapiens PE=2 SV=1 - [B4DNJ0_HUMAN]	6.56	9.22	4	3	3	3	586	56.4	7.33
A0A0J9YX88	PHD and RING finger domain-containing protein 1 OS=Homo sapiens GN=PHRF1 PE=1 SV=1 - [A0A0J9YX88_HUMAN]	6.56	2.54	8	3	3	3	1494	161.8	9.07
B3KWC4	cDNA FLJ42748 fis, clone BRAWH3000329, highly similar to Mitogen-activated protein kinase kinase kinase kinase 5 (EC 2.7.11.1) OS=Homo sapiens PE=2 SV=1 - [B3KWC4_HUMAN]	6.56	2.31	5	1	1	3	520	58.4	7.30
Q9UBB6	Neurochondrin OS=Homo sapiens GN=NCDN PE=1 SV=1 - [NCDN_HUMAN]	6.56	4.12	1	1	2	3	729	78.8	5.48
M0QXA7	Protein Wiz OS=Homo sapiens GN=WIZ PE=1 SV=1 - [M0QXA7_HUMAN]	6.56	2.58	4	2	2	3	968	103.2	9.52
E9PRD9	Vascular non-inflammatory molecule 2 (Fragment) OS=Homo sapiens GN=VNN2 PE=1 SV=1 - [E9PRD9_HUMAN]	6.56	12.75	2	1	1	2	102	11.5	5.16
A0A0A0MRM8	Unconventional myosin-VI OS=Homo sapiens GN=MYO6 PE=1 SV=1 - [A0A0A0MRM8_HUMAN]	6.55	2.55	4	2	3	3	1253	144.9	8.56
K7EPU6	Putative oxidoreductase GLYR1 (Fragment) OS=Homo sapiens GN=GLYR1 PE=1 SV=1 - [K7EPU6_HUMAN]	6.55	5.85	6	1	1	3	171	18.7	9.66
Q66K41	Zinc finger protein 385C OS=Homo sapiens GN=ZNF385C PE=1 SV=2 - [Z385C_HUMAN]	6.55	5.69	3	1	1	3	422	44.1	10.40
B3KMI0	cDNA FLJ11050 fis, clone PLACE1004564, highly similar to Cleavage and polyadenylation specificity factor 100 kDa subunit OS=Homo sapiens PE=2 SV=1 - [B3KMI0_HUMAN]	6.55	3.57	4	1	2	3	644	73.0	4.94
Q6UWP8	Suprabasin OS=Homo sapiens GN=SBSN PE=1 SV=2 - [SBSN_HUMAN]	6.55	6.10	1	1	1	2	590	60.5	7.01
E7EX21	Collagen alpha-1(XIII) chain OS=Homo sapiens GN=COL13A1 PE=1 SV=1 - [E7EX21_HUMAN]	6.55	5.15	7	2	2	3	582	57.6	9.48
D6R9P3	Heterogeneous nuclear ribonucleoprotein A/B OS=Homo sapiens GN=HNRNPAB PE=1 SV=1 - [D6R9P3_HUMAN]	6.55	15.71	5	2	3	3	280	30.3	7.91
Q86VR1	JPH1 protein (Fragment) OS=Homo sapiens GN=JPH1 PE=2 SV=1 - [Q86VR1_HUMAN]	6.55	4.86	4	1	2	3	556	60.1	9.41
Q96N05	HCG2018772 OS=Homo sapiens GN=hCG_2018772 PE=2 SV=1 - [Q96N05_HUMAN]	6.54	17.37	1	2	2	3	190	21.0	9.66
Q6Y806	Semenogelin I (Fragment) OS=Homo sapiens GN=SEMG1 PE=4 SV=1 - [Q6Y806_HUMAN]	6.54	12.90	9	1	1	3	93	10.4	9.74
Q8NH08	Olfactory receptor 10AC1 OS=Homo sapiens GN=OR10AC1 PE=3 SV=2 - [O10AC_HUMAN]	6.54	3.69	1	1	1	3	325	35.1	9.00
A8MVX0	Rho guanine nucleotide exchange factor 33 OS=Homo sapiens GN=ARHGEF33 PE=2 SV=2 - [ARG33_HUMAN]	6.54	6.75	3	2	3	3	844	94.6	6.81
Q9UKZ1	CCR4-NOT transcription complex subunit 11 OS=Homo sapiens GN=CNOT11 PE=1 SV=1 - [CNO11_HUMAN]	6.54	4.71	1	2	2	3	510	55.2	6.40
Q96NL6	Sodium channel and clathrin linker 1 OS=Homo sapiens GN=SCLT1 PE=1 SV=2 - [SCLT1_HUMAN]	6.54	5.23	1	1	3	3	688	80.9	6.07
H0YM30	Formin-1 OS=Homo sapiens GN=FMN1 PE=1 SV=1 - [H0YM30_HUMAN]	6.54	4.62	2	3	3	3	1321	146.4	8.70
A1XPJ1	SARP3 (Fragment) OS=Homo sapiens PE=2 SV=1 - [A1XPJ1_HUMAN]	6.53	4.40	7	1	2	3	591	64.9	6.80
A0A1B0GTW6	Band 4.1-like protein 1 (Fragment) OS=Homo sapiens GN=EPB41L1 PE=1 SV=1 - [A0A1B0GTW6_HUMAN]	6.53	3.37	4	1	2	3	1068	115.0	5.11
Q9NYG8	Potassium channel subfamily K member 4 OS=Homo sapiens GN=KCNK4 PE=1 SV=2 - [KCNK4_HUMAN]	6.53	5.60	2	1	1	3	393	42.7	8.65
Q702N8	Xin actin-binding repeat-containing protein 1 OS=Homo sapiens GN=XIRP1 PE=1 SV=1 - [XIRP1_HUMAN]	6.53	2.22	1	2	3	3	1843	198.4	6.15
Q9P2G4	Microtubule-associated protein 10 OS=Homo sapiens GN=MAP10 PE=1 SV=2 - [MAP10_HUMAN]	6.53	3.54	1	2	2	3	905	100.3	7.17
A8MZ77	cDNA FLJ52516, moderately similar to Basigin OS=Homo sapiens PE=2 SV=3 - [A8MZ77_HUMAN]	6.53	20.78	8	2	2	2	154	16.5	6.95
D3VVE0	Ataxin 3 variant m OS=Homo sapiens GN=ATXN3 PE=2 SV=1 - [D3VVE0_HUMAN]	6.53	5.32	1	1	1	3	301	34.7	4.68
B3KT39	Glycylpeptide N-tetradecanoyltransferase OS=Homo sapiens PE=2 SV=1 - [B3KT39_HUMAN]	6.53	8.87	7	3	3	3	485	56.7	9.51
Q5TGY3	AT-hook DNA-binding motif-containing protein 1 OS=Homo sapiens GN=AHDC1 PE=1 SV=1 - [AHDC1_HUMAN]	6.53	4.24	1	3	3	3	1603	168.2	9.04
Q13796	Protein Shroom2 OS=Homo sapiens GN=SHROOM2 PE=1 SV=1 - [SHRM2_HUMAN]	6.53	2.60	1	3	3	3	1616	176.3	7.09
B4DEK2	cDNA FLJ59182, highly similar to Splicing factor, arginine/serine-rich 7 OS=Homo sapiens PE=2 SV=1 - [B4DEK2_HUMAN]	6.53	15.15	6	2	2	3	165	18.8	10.68
Q59GW0	NMDA receptor 1 isoform NR1-2 variant (Fragment) OS=Homo sapiens PE=2 SV=1 - [Q59GW0_HUMAN]	6.53	7.09	5	3	3	3	663	73.9	9.16
E9PN67	Ninein OS=Homo sapiens GN=NIN PE=1 SV=1 - [E9PN67_HUMAN]	6.52	2.46	7	3	3	3	1989	231.0	4.97
Q9P242	Neuronal tyrosine-phosphorylated phosphoinositide-3-kinase adapter 2 OS=Homo sapiens GN=NYAP2 PE=1 SV=3 - [NYAP2_HUMAN]	6.52	6.74	1	3	3	3	653	70.5	8.48
A0A0C4DH79	Round spermatid basic protein 1 OS=Homo sapiens GN=RSBN1 PE=1 SV=1 - [A0A0C4DH79_HUMAN]	6.52	2.43	3	1	1	3	411	45.7	9.77
X6R3R3	Protein SOGA1 OS=Homo sapiens GN=SOGA1 PE=1 SV=1 - [X6R3R3_HUMAN]	6.52	2.76	5	1	2	3	1016	115.7	5.47
H0Y720	Trinucleotide repeat-containing gene 6B protein (Fragment) OS=Homo sapiens GN=TNRC6B PE=1 SV=1 - [H0Y720_HUMAN]	6.52	2.88	5	3	3	3	1391	148.6	7.27
Q02045	Myosin light chain 5 OS=Homo sapiens GN=MYL5 PE=2 SV=1 - [MYL5_HUMAN]	6.52	11.56	3	1	2	3	173	19.5	4.96
E7ER26	PR domain zinc finger protein 15 OS=Homo sapiens GN=PRDM15 PE=1 SV=2 - [E7ER26_HUMAN]	6.52	3.07	3	2	3	3	1141	129.5	7.96
E9PPA1	Oxysterols receptor LXR-alpha (Fragment) OS=Homo sapiens GN=NR1H3 PE=1 SV=1 - [E9PPA1_HUMAN]	6.52	21.56	10	1	2	3	167	18.5	5.38
C9J069	Uncharacterized protein C9orf172 OS=Homo sapiens GN=C9orf172 PE=3 SV=1 - [CI172_HUMAN]	6.52	1.54	1	1	1	3	976	106.6	9.03
Q5T011	Protein SZT2 OS=Homo sapiens GN=SZT2 PE=1 SV=3 - [SZT2_HUMAN]	6.51	1.75	1	2	3	3	3432	377.8	6.27
Q96JF0	Beta-galactoside alpha-2,6-sialyltransferase 2 OS=Homo sapiens GN=ST6GAL2 PE=1 SV=2 - [SIAT2_HUMAN]	6.51	3.21	1	2	2	3	529	60.1	9.74
Q96PX6	Coiled-coil domain-containing protein 85A OS=Homo sapiens GN=CCDC85A PE=2 SV=3 - [CC85A_HUMAN]	6.51	8.32	2	2	3	3	553	59.9	8.79
Q86YV5	Tyrosine-protein kinase SgK223 OS=Homo sapiens GN=SGK223 PE=1 SV=4 - [SG223_HUMAN]	6.50	3.77	1	2	3	3	1406	149.5	7.20
Q86UK0	ATP-binding cassette sub-family A member 12 OS=Homo sapiens GN=ABCA12 PE=1 SV=3 - [ABCAC_HUMAN]	6.50	1.46	2	1	3	3	2595	293.0	7.75
A8K996	cDNA FLJ75816, highly similar to Homo sapiens RAD54-like(RAD54L), mRNA OS=Homo sapiens PE=2 SV=1 - [A8K996_HUMAN]	6.50	4.69	7	3	3	3	747	84.3	8.56
A0A1B0GUI1	Ral GTPase-activating protein subunit alpha-1 OS=Homo sapiens GN=RALGAPA1 PE=1 SV=1 - [A0A1B0GUI1_HUMAN]	6.50	1.64	3	2	3	3	2495	280.2	6.44
C9JWC4	Holliday junction recognition protein (Fragment) OS=Homo sapiens GN=HJURP PE=1 SV=1 - [C9JWC4_HUMAN]	6.50	4.04	3	1	2	3	570	64.2	9.73
Q8IWQ1	TGS2 OS=Homo sapiens PE=2 SV=1 - [Q8IWQ1_HUMAN]	6.50	6.78	6	2	3	3	546	60.0	10.56
Q502W6	von Willebrand factor A domain-containing protein 3B OS=Homo sapiens GN=VWA3B PE=1 SV=3 - [VWA3B_HUMAN]	6.50	3.01	6	2	3	4	1294	145.7	7.33
H0YH88	Nucleosome assembly protein 1-like 1 (Fragment) OS=Homo sapiens GN=NAP1L1 PE=1 SV=1 - [H0YH88_HUMAN]	6.49	15.82	32	2	2	2	177	21.1	4.83
Q9UBS9	SUN domain-containing ossification factor OS=Homo sapiens GN=SUCO PE=1 SV=1 - [SUCO_HUMAN]	6.49	1.91	5	2	2	3	1254	139.3	5.01
Q5JRA6	Melanoma inhibitory activity protein 3 OS=Homo sapiens GN=MIA3 PE=1 SV=1 - [MIA3_HUMAN]	6.49	1.84	2	1	3	3	1907	213.6	4.84
B7Z3G4	cDNA FLJ60271, highly similar to SLIT-ROBO Rho GTPase-activating protein 2 OS=Homo sapiens PE=2 SV=1 - [B7Z3G4_HUMAN]	6.49	2.53	1	1	2	3	789	90.9	6.20
Q4W5I4	Putative uncharacterized protein COL25A1 (Fragment) OS=Homo sapiens GN=COL25A1 PE=4 SV=1 - [Q4W5I4_HUMAN]	6.48	16.09	7	3	3	3	317	30.8	6.16
A0A087WU78	Nance-Horan syndrome protein OS=Homo sapiens GN=NHS PE=1 SV=1 - [A0A087WU78_HUMAN]	6.48	2.76	4	3	3	3	1447	157.7	7.02
Q14297	Fetal beta-MHC binding factor OS=Homo sapiens PE=2 SV=1 - [Q14297_HUMAN]	6.48	10.55	1	2	3	3	398	44.1	9.54
A0A0G2JQC1	Mucin-4 (Fragment) OS=Homo sapiens GN=MUC4 PE=1 SV=1 - [A0A0G2JQC1_HUMAN]	6.48	2.82	23	1	3	3	1098	122.0	5.81
A0A024R1Y2	ATP-citrate synthase OS=Homo sapiens GN=ACLY PE=3 SV=1 - [A0A024R1Y2_HUMAN]	6.48	3.85	4	3	3	3	1091	119.7	7.33
B4DWL1	cDNA FLJ59240, highly similar to Far upstream element-binding protein 1 OS=Homo sapiens PE=2 SV=1 - [B4DWL1_HUMAN]	6.48	4.98	7	2	3	3	642	69.8	9.42
C9JKF1	Sterile alpha motif domain-containing protein 9 (Fragment) OS=Homo sapiens GN=SAMD9 PE=1 SV=1 - [C9JKF1_HUMAN]	6.47	3.59	3	3	3	3	1283	148.7	7.14
Q5W9G0	KIAA0638 splice variant 2 (Fragment) OS=Homo sapiens GN=KIAA0638 PE=2 SV=1 - [Q5W9G0_HUMAN]	6.47	4.36	10	1	3	3	1125	124.4	8.51
Q9NRC6	Spectrin beta chain, non-erythrocytic 5 OS=Homo sapiens GN=SPTBN5 PE=1 SV=2 - [SPTN5_HUMAN]	6.47	1.28	1	1	3	3	3674	416.5	6.65
A8MWA6	Putative protein FAM90A22P OS=Homo sapiens GN=FAM90A22P PE=5 SV=1 - [F90AM_HUMAN]	6.47	6.90	8	2	3	3	464	49.8	9.83
A0A024R363	Chromosome 3 open reading frame 63, isoform CRA_b OS=Homo sapiens GN=C3orf63 PE=4 SV=1 - [A0A024R363_HUMAN]	6.47	2.84	1	1	3	3	1233	140.0	5.66
Q4G0A6	Probable ubiquitin carboxyl-terminal hydrolase FAM188B OS=Homo sapiens GN=FAM188B PE=1 SV=2 - [F188B_HUMAN]	6.46	3.96	1	2	2	3	757	84.3	6.90
Q6ZNZ8	cDNA FLJ26816 fis, clone PRS06437 OS=Homo sapiens PE=2 SV=1 - [Q6ZNZ8_HUMAN]	6.46	9.65	4	1	3	3	508	54.5	10.01
Q13164	Mitogen-activated protein kinase 7 OS=Homo sapiens GN=MAPK7 PE=1 SV=2 - [MK07_HUMAN]	6.46	3.19	3	2	2	3	816	88.3	5.88
B3KQW9	cDNA FLJ33223 fis, clone ASTRO2000914, highly similar to Homo sapiens Fad1, flavin adenine dinucleotide synthetase, homolog (yeast) (FLAD1), transcript variant 1, mRNA OS=Homo sapiens PE=2 SV=1 - [B3KQW9_HUMAN]	6.46	7.68	3	2	2	3	456	50.1	7.23
I3L2C7	Gem-associated protein 4 OS=Homo sapiens GN=GEMIN4 PE=1 SV=1 - [I3L2C7_HUMAN]	6.46	1.43	5	1	1	3	1047	118.7	6.19
Q7Z2K8	G protein-regulated inducer of neurite outgrowth 1 OS=Homo sapiens GN=GPRIN1 PE=1 SV=2 - [GRIN1_HUMAN]	6.45	3.87	1	2	3	3	1008	102.3	8.06
F8W9C3	CUB and sushi domain-containing protein 1 OS=Homo sapiens GN=CSMD1 PE=1 SV=1 - [F8W9C3_HUMAN]	6.45	1.30	7	3	3	3	3388	370.0	5.96
Q13470	Non-receptor tyrosine-protein kinase TNK1 OS=Homo sapiens GN=TNK1 PE=1 SV=3 - [TNK1_HUMAN]	6.45	4.80	3	2	3	3	666	72.4	9.48
Q86VC1	XPO4 protein (Fragment) OS=Homo sapiens GN=XPO4 PE=2 SV=1 - [Q86VC1_HUMAN]	6.45	1.09	5	1	1	3	829	93.8	4.83
B4DX56	Doublesex- and mab-3-related transcription factor C2 OS=Homo sapiens GN=DMRTC2 PE=1 SV=1 - [B4DX56_HUMAN]	6.45	3.83	1	2	3	3	418	44.7	8.63
A5YM63	NEFM protein OS=Homo sapiens GN=NEFM PE=2 SV=1 - [A5YM63_HUMAN]	6.45	4.56	6	3	3	3	877	98.3	4.86
B7Z4H2	cDNA FLJ50577, highly similar to Discs large homolog 4 OS=Homo sapiens PE=2 SV=1 - [B7Z4H2_HUMAN]	6.44	6.17	7	2	3	3	664	73.9	6.23
A0A075B784	Ubiquitin carboxyl-terminal hydrolase 36 OS=Homo sapiens GN=USP36 PE=1 SV=1 - [A0A075B784_HUMAN]	6.44	4.06	4	1	3	3	961	104.3	9.76
Q8WYH5	Putative uncharacterized protein PP1045 OS=Homo sapiens GN=PP1045 PE=2 SV=1 - [Q8WYH5_HUMAN]	6.44	7.17	7	2	3	3	586	63.8	8.41
Q6PK12	DMD protein (Fragment) OS=Homo sapiens GN=DMD PE=2 SV=1 - [Q6PK12_HUMAN]	6.44	2.16	1	1	1	3	462	53.1	6.54
A8K171	cDNA FLJ77253, highly similar to Homo sapiens nuclear receptor interacting protein 1 (NRIP1), mRNA OS=Homo sapiens PE=2 SV=1 - [A8K171_HUMAN]	6.43	3.45	2	3	3	3	1158	126.8	7.99
Q59GE5	Glutamate receptor homolog (Fragment) OS=Homo sapiens PE=3 SV=1 - [Q59GE5_HUMAN]	6.43	3.43	7	1	3	3	1080	117.4	7.74
A0A087WYG4	Maestro heat-like repeat family member 5 OS=Homo sapiens GN=MROH5 PE=4 SV=1 - [A0A087WYG4_HUMAN]	6.43	4.48	3	3	3	3	1317	148.9	7.69
Q8IZS8	Voltage-dependent calcium channel subunit alpha-2/delta-3 OS=Homo sapiens GN=CACNA2D3 PE=1 SV=1 - [CA2D3_HUMAN]	6.43	2.66	1	1	2	3	1091	122.9	5.78
B4DVH8	cDNA FLJ53216, highly similar to Homo sapiens diacylglycerol lipase beta OS=Homo sapiens PE=2 SV=1 - [B4DVH8_HUMAN]	6.42	7.39	1	1	2	3	379	41.5	5.87
Q9NXW9	Alpha-ketoglutarate-dependent dioxygenase alkB homolog 4 OS=Homo sapiens GN=ALKBH4 PE=1 SV=1 - [ALKB4_HUMAN]	6.42	10.60	1	3	3	3	302	33.8	6.67
Q9C0D2	Centrosomal protein of 295 kDa OS=Homo sapiens GN=CEP295 PE=1 SV=4 - [CE295_HUMAN]	6.42	1.69	3	3	3	3	2601	295.0	6.00
Q7Z606	Breast and ovarian cancer susceptibility protein (Fragment) OS=Homo sapiens GN=BRCA1 PE=4 SV=1 - [Q7Z606_HUMAN]	6.42	2.45	15	2	2	3	1141	127.0	5.77
Q5TGY6	Tyrosine-protein kinase (Fragment) OS=Homo sapiens GN=FGR PE=1 SV=8 - [Q5TGY6_HUMAN]	6.41	2.24	3	1	1	3	312	34.5	6.79
H0YBN7	Squalene monooxygenase (Fragment) OS=Homo sapiens GN=SQLE PE=1 SV=1 - [H0YBN7_HUMAN]	6.41	17.79	6	1	2	3	163	18.4	9.14
Q7Z6E9	E3 ubiquitin-protein ligase RBBP6 OS=Homo sapiens GN=RBBP6 PE=1 SV=1 - [RBBP6_HUMAN]	6.41	2.29	5	2	3	3	1792	201.4	9.64
B7Z7T4	cDNA FLJ54511, highly similar to Homo sapiens leucine zipper-EF-hand containing transmembrane protein 2 (LETM2), mRNA OS=Homo sapiens PE=2 SV=1 - [B7Z7T4_HUMAN]	6.41	12.90	4	2	3	3	217	24.7	9.23
A0A140TA32	Complement C4-A OS=Homo sapiens GN=C4A PE=1 SV=1 - [A0A140TA32_HUMAN]	6.41	1.53	11	1	2	3	1698	187.6	7.12
H7C4Q3	Proline-rich transmembrane protein 4 (Fragment) OS=Homo sapiens GN=PRRT4 PE=4 SV=1 - [H7C4Q3_HUMAN]	6.41	7.88	3	2	2	3	419	43.7	11.50
H7BY35	Ryanodine receptor 2 OS=Homo sapiens GN=RYR2 PE=1 SV=2 - [H7BY35_HUMAN]	6.41	0.77	3	2	3	3	4950	562.2	6.19
Q5VWN6	Protein FAM208B OS=Homo sapiens GN=FAM208B PE=1 SV=1 - [F208B_HUMAN]	6.40	1.28	1	1	2	3	2430	268.7	5.90
Q6ZW33	MICAL C-terminal-like protein OS=Homo sapiens GN=MICALCL PE=1 SV=3 - [MICLK_HUMAN]	6.40	7.48	1	1	2	2	695	77.2	8.50
Q4W5T8	Putative uncharacterized protein PKP4 (Fragment) OS=Homo sapiens GN=PKP4 PE=4 SV=1 - [Q4W5T8_HUMAN]	6.40	4.01	4	2	3	3	1147	127.1	9.20
Q8N9B5	Junction-mediating and -regulatory protein OS=Homo sapiens GN=JMY PE=1 SV=2 - [JMY_HUMAN]	6.40	3.14	1	1	3	3	988	111.4	6.18
Q5T1R4	Transcription factor HIVEP3 OS=Homo sapiens GN=HIVEP3 PE=2 SV=1 - [ZEP3_HUMAN]	6.39	1.41	1	2	2	3	2406	259.3	7.81
A0A024R680	AT rich interactive domain 4A (RBP1-like), isoform CRA_b OS=Homo sapiens GN=ARID4A PE=4 SV=1 - [A0A024R680_HUMAN]	6.39	1.26	3	1	1	3	1188	134.9	4.98
Q5VUA4	Zinc finger protein 318 OS=Homo sapiens GN=ZNF318 PE=1 SV=2 - [ZN318_HUMAN]	6.39	1.76	1	2	3	3	2279	251.0	7.20
Q9Y6X9	MORC family CW-type zinc finger protein 2 OS=Homo sapiens GN=MORC2 PE=1 SV=2 - [MORC2_HUMAN]	6.39	2.81	3	2	2	3	1032	117.7	8.38
B4DSR2	cDNA FLJ52234 OS=Homo sapiens PE=1 SV=1 - [B4DSR2_HUMAN]	6.39	22.02	1	2	2	3	109	11.0	11.19
O43237	Cytoplasmic dynein 1 light intermediate chain 2 OS=Homo sapiens GN=DYNC1LI2 PE=1 SV=1 - [DC1L2_HUMAN]	6.39	5.49	2	1	2	3	492	54.1	6.38
Q0VD86	Protein INCA1 OS=Homo sapiens GN=INCA1 PE=1 SV=1 - [INCA1_HUMAN]	6.39	7.63	1	1	1	3	236	26.8	7.34
Q15142	Polycystic kidney disease-associated protein OS=Homo sapiens GN=PKD1 PE=4 SV=1 - [Q15142_HUMAN]	6.38	0.74	4	1	2	3	3638	391.9	6.90
B2RA05	cDNA, FLJ94642, highly similar to Homo sapiens CCCTC-binding factor (zinc finger protein)-like (CTCFL), mRNA OS=Homo sapiens PE=2 SV=1 - [B2RA05_HUMAN]	6.38	6.94	13	2	3	3	663	75.7	8.34
Q7Z3E5	LisH domain-containing protein ARMC9 OS=Homo sapiens GN=ARMC9 PE=1 SV=2 - [ARMC9_HUMAN]	6.38	3.30	4	2	2	3	817	91.7	6.20
P02462	Collagen alpha-1(IV) chain OS=Homo sapiens GN=COL4A1 PE=1 SV=3 - [CO4A1_HUMAN]	6.38	2.88	1	1	3	3	1669	160.5	8.28
Q59GF0	Thyroglobulin variant (Fragment) OS=Homo sapiens PE=2 SV=1 - [Q59GF0_HUMAN]	6.37	2.10	8	2	2	3	1574	173.0	6.05
Q9BXU8	Ferritin heavy polypeptide-like 17 OS=Homo sapiens GN=FTHL17 PE=2 SV=1 - [FHL17_HUMAN]	6.36	6.01	1	1	1	3	183	21.1	6.52
Q59FK0	UDP-N-acetyl-alpha-D-galactosamine:(N-acetylneuraminyl)-galactosylglucosylceramide N-acetylgalactosaminyltransferase variant (Fragment) OS=Homo sapiens PE=2 SV=1 - [Q59FK0_HUMAN]	6.36	9.28	11	1	3	3	474	51.6	8.66
Q14721	Potassium voltage-gated channel subfamily B member 1 OS=Homo sapiens GN=KCNB1 PE=1 SV=2 - [KCNB1_HUMAN]	6.35	3.61	2	1	2	3	858	95.8	8.07
M0R167	Zinc finger protein 541 (Fragment) OS=Homo sapiens GN=ZNF541 PE=4 SV=1 - [M0R167_HUMAN]	6.35	2.77	4	1	2	3	866	94.4	8.85
E9PDF1	SH3 domain and tetratricopeptide repeat-containing protein 2 OS=Homo sapiens GN=SH3TC2 PE=1 SV=1 - [E9PDF1_HUMAN]	6.35	2.07	6	1	2	3	1259	141.4	6.39
F2Z2X0	Nucleoside diphosphate kinase OS=Homo sapiens GN=NME4 PE=1 SV=1 - [F2Z2X0_HUMAN]	6.35	11.16	5	2	2	3	233	25.4	11.05
B4DGM5	cDNA FLJ53983, highly similar to IWS1 homolog OS=Homo sapiens PE=2 SV=1 - [B4DGM5_HUMAN]	6.35	4.12	5	1	2	3	729	82.1	4.78
P13056	Nuclear receptor subfamily 2 group C member 1 OS=Homo sapiens GN=NR2C1 PE=1 SV=2 - [NR2C1_HUMAN]	6.34	4.98	5	2	2	3	603	67.3	6.32
A6NES4	Maestro heat-like repeat-containing protein family member 2A OS=Homo sapiens GN=MROH2A PE=4 SV=4 - [MRO2A_HUMAN]	6.34	1.37	2	1	2	3	1674	189.4	6.68
F6WMK9	Cold-inducible RNA-binding protein (Fragment) OS=Homo sapiens GN=CIRBP PE=1 SV=1 - [F6WMK9_HUMAN]	6.34	17.24	1	1	1	3	58	6.1	9.57
Q71VN3	Centromere protein B (Fragment) OS=Homo sapiens PE=2 SV=1 - [Q71VN3_HUMAN]	6.34	16.95	2	1	1	3	59	6.7	9.54
Q5VU65	Nuclear pore membrane glycoprotein 210-like OS=Homo sapiens GN=NUP210L PE=2 SV=1 - [P210L_HUMAN]	6.33	1.64	1	2	2	3	1888	210.5	7.50
H0Y843	EF-hand calcium-binding domain-containing protein 5 (Fragment) OS=Homo sapiens GN=EFCAB5 PE=1 SV=1 - [H0Y843_HUMAN]	6.33	3.71	4	1	3	3	1185	136.7	6.02
Q96Q91	Anion exchange protein 4 OS=Homo sapiens GN=SLC4A9 PE=2 SV=2 - [B3A4_HUMAN]	6.33	3.26	1	2	2	3	983	108.2	7.09
Q86T65	Disheveled-associated activator of morphogenesis 2 OS=Homo sapiens GN=DAAM2 PE=1 SV=3 - [DAAM2_HUMAN]	6.33	4.40	2	2	3	3	1068	123.4	6.80
Q9Y5T4	DnaJ homolog subfamily C member 15 OS=Homo sapiens GN=DNAJC15 PE=1 SV=2 - [DJC15_HUMAN]	6.33	6.00	1	1	1	3	150	16.4	10.08
Q86YS3	Rab11 family-interacting protein 4 OS=Homo sapiens GN=RAB11FIP4 PE=1 SV=1 - [RFIP4_HUMAN]	6.32	4.08	1	1	2	3	637	71.9	4.87
Q13535	Serine/threonine-protein kinase ATR OS=Homo sapiens GN=ATR PE=1 SV=3 - [ATR_HUMAN]	6.32	1.44	1	1	3	3	2644	301.2	7.43
Q9Y3R5	Protein dopey-2 OS=Homo sapiens GN=DOPEY2 PE=1 SV=5 - [DOP2_HUMAN]	6.32	1.87	1	3	3	3	2298	258.1	6.29
C9JS50	Metalloreductase STEAP4 OS=Homo sapiens GN=STEAP4 PE=1 SV=1 - [C9JS50_HUMAN]	6.31	12.98	2	3	3	3	339	38.6	8.88
B4DSF6	Voltage-dependent calcium channel subunit alpha-2/delta-3 OS=Homo sapiens GN=CACNA2D3 PE=1 SV=1 - [B4DSF6_HUMAN]	6.31	6.29	1	1	2	3	525	60.2	5.97
A0A126LB21	Helicase/primase complex OS=Homo sapiens GN=U74 PE=3 SV=1 - [A0A126LB21_HUMAN]	6.31	4.23	1	2	2	3	662	76.4	5.91
Q96J94	Piwi-like protein 1 OS=Homo sapiens GN=PIWIL1 PE=1 SV=1 - [PIWL1_HUMAN]	6.30	6.62	6	2	3	3	861	98.5	9.44
P17948	Vascular endothelial growth factor receptor 1 OS=Homo sapiens GN=FLT1 PE=1 SV=2 - [VGFR1_HUMAN]	6.30	3.06	3	2	3	3	1338	150.7	8.38
O14578	Citron Rho-interacting kinase OS=Homo sapiens GN=CIT PE=1 SV=2 - [CTRO_HUMAN]	6.30	1.83	2	3	3	3	2027	231.3	6.57
A0AV47	Topoisomerase (DNA) II binding protein 1 OS=Homo sapiens GN=TOPBP1 PE=2 SV=2 - [A0AV47_HUMAN]	6.29	1.46	3	2	2	3	1435	160.5	6.99
E9PH99	E3 SUMO-protein ligase ZNF451 OS=Homo sapiens GN=ZNF451 PE=1 SV=1 - [E9PH99_HUMAN]	6.28	3.75	4	3	3	3	1041	119.3	7.27
Q0MQR4	Poly (ADP-ribose) glycohydrolase OS=Homo sapiens GN=PARG PE=2 SV=1 - [Q0MQR4_HUMAN]	6.28	3.69	4	2	3	3	976	110.9	6.55
Q8IWK6	Adhesion G protein-coupled receptor A3 OS=Homo sapiens GN=ADGRA3 PE=1 SV=2 - [AGRA3_HUMAN]	6.28	3.03	3	3	3	3	1321	146.1	8.48
H7C2Z1	Apoptogenic protein 1, mitochondrial (Fragment) OS=Homo sapiens GN=APOPT1 PE=4 SV=1 - [H7C2Z1_HUMAN]	6.28	10.83	1	1	1	3	120	13.8	10.15
E9PN17	ATP synthase subunit g, mitochondrial OS=Homo sapiens GN=ATP5L PE=1 SV=1 - [E9PN17_HUMAN]	6.28	11.84	2	1	1	3	76	8.4	10.29
Q86TE2	Putative uncharacterized protein DKFZp451G231 (Fragment) OS=Homo sapiens GN=DKFZp451G231 PE=2 SV=2 - [Q86TE2_HUMAN]	6.27	4.76	7	3	3	3	966	105.4	6.00
Q5SVK0	Calcium-activated potassium channel subunit alpha-1 (Fragment) OS=Homo sapiens GN=KCNMA1 PE=1 SV=1 - [Q5SVK0_HUMAN]	6.26	2.31	6	1	3	3	1167	131.3	6.79
A5YM51	MYH7 protein (Fragment) OS=Homo sapiens GN=MYH7 PE=2 SV=1 - [A5YM51_HUMAN]	6.26	2.17	9	1	3	3	1934	222.9	5.80
B4DYH9	cDNA FLJ56518, highly similar to Myomesin-1 OS=Homo sapiens PE=2 SV=1 - [B4DYH9_HUMAN]	6.26	9.06	5	2	3	3	552	62.0	7.18
F8WAG1	Ras-related protein Rab-17 OS=Homo sapiens GN=RAB17 PE=1 SV=1 - [F8WAG1_HUMAN]	6.25	26.92	4	1	1	3	52	5.6	11.59
Q49AJ0	Protein FAM135B OS=Homo sapiens GN=FAM135B PE=2 SV=2 - [F135B_HUMAN]	6.25	3.06	3	3	3	3	1406	155.7	5.86
A0A024R7N6	Phosphoinositide-3-kinase, regulatory subunit 2 (P85 beta), isoform CRA_a OS=Homo sapiens GN=PIK3R2 PE=4 SV=1 - [A0A024R7N6_HUMAN]	6.25	5.08	7	1	3	3	728	81.5	6.43
Q8IZ48	Fas (TNFRSF6) binding factor 1 OS=Homo sapiens GN=FBF1 PE=2 SV=1 - [Q8IZ48_HUMAN]	6.25	4.82	5	3	3	3	830	90.2	7.15
B4DSU0	cDNA FLJ61379, highly similar to Sterol regulatory element-binding protein 2 OS=Homo sapiens PE=2 SV=1 - [B4DSU0_HUMAN]	6.24	3.45	4	1	3	3	1102	119.5	8.37
Q9HAU5	Regulator of nonsense transcripts 2 OS=Homo sapiens GN=UPF2 PE=1 SV=1 - [RENT2_HUMAN]	6.24	2.91	2	2	3	3	1272	147.7	5.69
B7Z814	cDNA FLJ61667, highly similar to Homo sapiens regulator of G-protein signalling like 2 (RGSL2), mRNA OS=Homo sapiens PE=2 SV=1 - [B7Z814_HUMAN]	6.23	3.76	3	1	3	3	984	114.9	8.78
G3V599	Uncharacterized protein OS=Homo sapiens PE=4 SV=1 - [G3V599_HUMAN]	6.23	2.84	7	2	3	3	1339	151.6	4.70
P17252	Protein kinase C alpha type OS=Homo sapiens GN=PRKCA PE=1 SV=4 - [KPCA_HUMAN]	6.23	5.80	6	2	3	3	672	76.7	7.05
B2RCD8	cDNA, FLJ96012, highly similar to Homo sapiens interferon regulatory factor 2 binding protein 1 (IRF2BP1), mRNA OS=Homo sapiens PE=2 SV=1 - [B2RCD8_HUMAN]	6.23	8.73	2	2	3	3	584	61.7	8.18
Q8IZS0	MRDS1 protein (Fragment) OS=Homo sapiens GN=MRDS1 PE=2 SV=1 - [Q8IZS0_HUMAN]	6.23	15.33	11	1	3	3	300	34.1	5.47
A6H8K3	ITPR3 protein (Fragment) OS=Homo sapiens GN=ITPR3 PE=2 SV=1 - [A6H8K3_HUMAN]	6.23	3.15	3	3	3	3	1049	119.1	6.29
A0A087WZI7	Anion exchange transporter OS=Homo sapiens GN=SLC26A7 PE=4 SV=1 - [A0A087WZI7_HUMAN]	6.22	11.83	2	3	3	3	355	39.2	6.65
Q96L91	E1A-binding protein p400 OS=Homo sapiens GN=EP400 PE=1 SV=4 - [EP400_HUMAN]	6.22	1.46	4	1	3	3	3159	343.3	9.19
Q8WYJ6	Septin-1 OS=Homo sapiens GN=SEPT1 PE=1 SV=2 - [SEPT1_HUMAN]	6.21	6.27	2	1	2	3	367	41.9	5.80
Q13151	Heterogeneous nuclear ribonucleoprotein A0 OS=Homo sapiens GN=HNRNPA0 PE=1 SV=1 - [ROA0_HUMAN]	6.21	11.80	1	2	2	3	305	30.8	9.29
B2RTQ5	LRRC16A protein OS=Homo sapiens GN=LRRC16A PE=2 SV=1 - [B2RTQ5_HUMAN]	6.20	3.37	4	2	3	3	1365	150.8	7.77
B4DJ12	cDNA FLJ58355, highly similar to Tyrosine-protein phosphatase non-receptor type 23 (EC 3.1.3.48) OS=Homo sapiens PE=2 SV=1 - [B4DJ12_HUMAN]	6.18	3.35	5	3	3	3	1253	139.2	6.57
A0A0D9SEN7	Runt-related transcription factor 2 OS=Homo sapiens GN=RUNX2 PE=1 SV=1 - [A0A0D9SEN7_HUMAN]	6.18	4.54	8	2	2	3	485	52.6	9.47
Q86UX6	Serine/threonine-protein kinase 32C OS=Homo sapiens GN=STK32C PE=1 SV=1 - [ST32C_HUMAN]	6.17	3.29	1	1	1	3	486	55.0	6.61
Q96A19	Coiled-coil domain-containing protein 102A OS=Homo sapiens GN=CCDC102A PE=1 SV=2 - [C102A_HUMAN]	6.15	2.91	1	1	1	3	550	62.6	5.58
B1WB49	BDP1 protein (Fragment) OS=Homo sapiens GN=BDP1 PE=2 SV=1 - [B1WB49_HUMAN]	6.14	1.79	6	3	3	3	2621	293.2	5.08
Q6TDP4	Kelch-like protein 17 OS=Homo sapiens GN=KLHL17 PE=2 SV=1 - [KLH17_HUMAN]	6.14	6.39	2	2	3	3	642	69.8	7.71
B2M1S7	Beta-globin Showa Yakushiji variant (Fragment) OS=Homo sapiens GN=HBB PE=3 SV=1 - [B2M1S7_HUMAN]	6.13	28.57	8	1	1	2	42	4.5	8.92
Q8IXZ2	Zinc finger CCCH domain-containing protein 3 OS=Homo sapiens GN=ZC3H3 PE=1 SV=3 - [ZC3H3_HUMAN]	6.12	3.38	2	2	2	3	948	101.9	10.95
H0UI91	Potassium voltage-gated channel, KQT-like subfamily, member 2, isoform CRA_j OS=Homo sapiens GN=KCNQ2 PE=3 SV=1 - [H0UI91_HUMAN]	6.11	4.86	10	2	3	3	844	93.0	9.25
Q2TAC2	Coiled-coil domain-containing protein 57 OS=Homo sapiens GN=CCDC57 PE=1 SV=2 - [CCD57_HUMAN]	6.08	4.91	1	3	3	3	916	103.1	6.55
A0A126LAV0	Pp100 OS=Homo sapiens GN=U11 PE=4 SV=1 - [A0A126LAV0_HUMAN]	6.08	4.25	1	2	3	3	871	97.1	5.87
Q9Y4B5	Microtubule cross-linking factor 1 OS=Homo sapiens GN=MTCL1 PE=1 SV=5 - [MTCL1_HUMAN]	6.03	2.10	1	2	3	3	1905	209.4	6.43
Q8N913	cDNA FLJ38576 fis, clone HCHON2007482 OS=Homo sapiens PE=2 SV=1 - [Q8N913_HUMAN]	6.00	6.72	1	1	1	2	238	25.3	11.58
E9PDF6	Unconventional myosin-Ib OS=Homo sapiens GN=MYO1B PE=1 SV=1 - [E9PDF6_HUMAN]	6.00	2.89	5	2	2	2	1107	128.4	9.31
H0YEV2	Src substrate cortactin (Fragment) OS=Homo sapiens GN=CTTN PE=1 SV=1 - [H0YEV2_HUMAN]	5.97	15.63	6	1	1	2	128	14.3	5.35
C9JB51	Hyaluronidase (Fragment) OS=Homo sapiens GN=HYAL3 PE=1 SV=8 - [C9JB51_HUMAN]	5.94	10.06	4	1	1	2	159	17.6	8.54
V9HW54	Epididymis luminal protein 123 OS=Homo sapiens GN=HEL-123 PE=2 SV=1 - [V9HW54_HUMAN]	5.93	1.17	1	1	1	2	1026	110.3	9.06
Q8WV74	Nucleoside diphosphate-linked moiety X motif 8 OS=Homo sapiens GN=NUDT8 PE=1 SV=2 - [NUDT8_HUMAN]	5.92	6.78	1	1	1	2	236	25.4	8.41
B2R9F5	cDNA, FLJ94365 OS=Homo sapiens PE=2 SV=1 - [B2R9F5_HUMAN]	5.86	1.72	2	1	1	2	755	86.6	9.10
O60290	Zinc finger protein 862 OS=Homo sapiens GN=ZNF862 PE=2 SV=2 - [ZN862_HUMAN]	5.86	3.59	1	2	2	2	1169	131.6	7.23
A8KAK1	cDNA FLJ77398, highly similar to Homo sapiens UDP-glucose ceramide glucosyltransferase-like 1, transcript variant 2, mRNA OS=Homo sapiens PE=2 SV=1 - [A8KAK1_HUMAN]	5.84	2.61	2	2	2	2	1531	174.9	5.52
Q9HB62	Glutaminase (Fragment) OS=Homo sapiens PE=2 SV=1 - [Q9HB62_HUMAN]	5.83	10.45	2	1	1	2	134	14.7	5.48
P78412	Iroquois-class homeodomain protein IRX-6 OS=Homo sapiens GN=IRX6 PE=2 SV=3 - [IRX6_HUMAN]	5.83	2.69	1	1	1	2	446	48.2	6.02
Q8WYK1	Contactin-associated protein-like 5 OS=Homo sapiens GN=CNTNAP5 PE=2 SV=1 - [CNTP5_HUMAN]	5.82	4.13	1	2	2	2	1306	145.5	6.29
Q9Y512	Sorting and assembly machinery component 50 homolog OS=Homo sapiens GN=SAMM50 PE=1 SV=3 - [SAM50_HUMAN]	5.80	4.48	1	1	1	2	469	51.9	6.90
Q9Y615	Actin-like protein 7A OS=Homo sapiens GN=ACTL7A PE=1 SV=1 - [ACL7A_HUMAN]	5.80	8.05	1	1	2	2	435	48.6	7.09
Q96L33	Rho-related GTP-binding protein RhoV OS=Homo sapiens GN=RHOV PE=1 SV=1 - [RHOV_HUMAN]	5.79	17.37	2	2	2	2	236	26.2	8.05
Q08495	Dematin OS=Homo sapiens GN=DMTN PE=1 SV=3 - [DEMA_HUMAN]	5.75	6.91	5	1	2	2	405	45.5	8.88
Q12802	A-kinase anchor protein 13 OS=Homo sapiens GN=AKAP13 PE=1 SV=2 - [AKP13_HUMAN]	5.75	1.32	6	2	2	2	2813	307.4	5.24
B4E2C3	cDNA FLJ59291, highly similar to Slp homolog lacking C2 domains b (Fragment) OS=Homo sapiens PE=2 SV=1 - [B4E2C3_HUMAN]	5.74	1.01	6	1	1	2	1192	133.4	7.23
B3KRD0	cDNA FLJ34045 fis, clone FCBBF2007095, highly similar to AT-hook-containing transcription factor 1 (Fragment) OS=Homo sapiens PE=2 SV=1 - [B3KRD0_HUMAN]	5.72	4.13	2	1	2	2	750	83.4	7.77
B4DDS9	cDNA FLJ53878, weakly similar to Homo sapiens GREB1 protein (GREB1), transcript variant a, mRNA OS=Homo sapiens PE=2 SV=1 - [B4DDS9_HUMAN]	5.71	1.23	2	1	1	2	974	108.6	6.15
L8E7T4	Alternative protein LIMK2 OS=Homo sapiens GN=LIMK2 PE=4 SV=1 - [L8E7T4_HUMAN]	5.69	34.29	1	1	1	2	70	6.8	11.84
X5D7K9	Major vault protein isoform C (Fragment) OS=Homo sapiens GN=MVP PE=2 SV=1 - [X5D7K9_HUMAN]	5.69	4.96	11	1	2	2	827	91.9	5.41
Q96QI5	Heparan sulfate glucosamine 3-O-sulfotransferase 6 OS=Homo sapiens GN=HS3ST6 PE=1 SV=2 - [HS3S6_HUMAN]	5.68	10.82	1	2	2	2	342	37.2	10.78
B4DG61	cDNA FLJ56430, highly similar to Polyhomeotic-like protein 2 OS=Homo sapiens PE=2 SV=1 - [B4DG61_HUMAN]	5.68	8.22	5	2	2	2	572	61.9	8.19
E5KN59	Peptidyl-prolyl cis-trans isomerase D OS=Homo sapiens PE=4 SV=1 - [E5KN59_HUMAN]	5.66	10.81	4	1	2	2	370	40.7	7.21
Q68CP0	Putative uncharacterized protein DKFZp686B2325 (Fragment) OS=Homo sapiens GN=DKFZp686B2325 PE=2 SV=1 - [Q68CP0_HUMAN]	5.65	1.79	4	1	2	2	2403	273.3	7.88
B4DNB9	cDNA FLJ53069, highly similar to AP-2 complex subunit mu-1 OS=Homo sapiens PE=2 SV=1 - [B4DNB9_HUMAN]	5.64	8.70	8	2	2	2	460	52.3	9.50
H0YN28	Annexin (Fragment) OS=Homo sapiens GN=ANXA2 PE=1 SV=1 - [H0YN28_HUMAN]	5.64	17.99	17	2	2	2	139	16.1	5.17
A0A0A0MSJ4	Cytokine-dependent hematopoietic cell linker OS=Homo sapiens GN=CLNK PE=1 SV=1 - [A0A0A0MSJ4_HUMAN]	5.64	2.80	2	1	1	2	428	49.5	9.01
B3KSC3	cDNA FLJ35987 fis, clone TESTI2014269, highly similar to D-3-phosphoglycerate dehydrogenase (EC 1.1.1.95) OS=Homo sapiens PE=2 SV=1 - [B3KSC3_HUMAN]	5.64	2.20	4	1	1	2	499	53.0	7.12
Q00610	Clathrin heavy chain 1 OS=Homo sapiens GN=CLTC PE=1 SV=5 - [CLH1_HUMAN]	5.63	1.97	4	1	2	2	1675	191.5	5.69
Q8TER2	FLJ00131 protein (Fragment) OS=Homo sapiens GN=FLJ00131 PE=2 SV=1 - [Q8TER2_HUMAN]	5.61	29.48	1	1	2	2	173	18.4	8.48
Q96QA9	Multidrug resistance associated protein OS=Homo sapiens GN=MRP3 PE=4 SV=1 - [Q96QA9_HUMAN]	5.58	1.45	10	2	2	2	1514	167.7	7.18
B3KMZ2	cDNA FLJ13019 fis, clone NT2RP3000736, highly similar to Protein FAM53B OS=Homo sapiens PE=2 SV=1 - [B3KMZ2_HUMAN]	5.56	7.69	2	1	2	2	312	34.3	8.63
G3V3H2	A-kinase anchor protein 6 (Fragment) OS=Homo sapiens GN=AKAP6 PE=4 SV=8 - [G3V3H2_HUMAN]	5.55	7.30	5	1	1	2	356	38.4	5.96
B2R782	cDNA, FLJ93323, highly similar to Homo sapiens histamine receptor H1 (HRH1), mRNA OS=Homo sapiens PE=2 SV=1 - [B2R782_HUMAN]	5.52	7.80	3	2	2	2	487	55.6	9.17
P43364	Melanoma-associated antigen 11 OS=Homo sapiens GN=MAGEA11 PE=1 SV=2 - [MAGAB_HUMAN]	5.51	3.03	1	1	1	2	429	48.1	4.75
F5GXU9	2-oxoisovalerate dehydrogenase subunit alpha, mitochondrial (Fragment) OS=Homo sapiens GN=BCKDHA PE=4 SV=1 - [F5GXU9_HUMAN]	5.51	14.94	1	1	2	2	328	36.1	7.20
Q8N1W1	Rho guanine nucleotide exchange factor 28 OS=Homo sapiens GN=ARHGEF28 PE=1 SV=3 - [ARG28_HUMAN]	5.51	1.76	1	2	2	2	1705	191.8	6.04
Q9NWI4	cDNA FLJ20837 fis, clone ADKA02602 OS=Homo sapiens PE=2 SV=1 - [Q9NWI4_HUMAN]	5.49	5.77	4	1	1	2	208	23.3	7.09
A8MUP6	Germ cell-specific gene 1-like protein 2 OS=Homo sapiens GN=GSG1L2 PE=3 SV=3 - [GS1L2_HUMAN]	5.47	4.44	1	1	1	2	293	32.4	6.77
Q9P2J8	Zinc finger protein 624 OS=Homo sapiens GN=ZNF624 PE=1 SV=3 - [ZN624_HUMAN]	5.46	4.74	1	1	2	2	865	99.9	8.88
G3XAD2	Alpha-(1,6)-fucosyltransferase OS=Homo sapiens GN=FUT8 PE=1 SV=1 - [G3XAD2_HUMAN]	5.46	3.36	3	1	1	2	446	51.1	8.35
B4DGH9	cDNA FLJ58772, highly similar to Fragile X mental retardation syndrome-related protein 1 OS=Homo sapiens PE=2 SV=1 - [B4DGH9_HUMAN]	5.45	4.85	12	1	2	2	454	50.9	7.05
Q6ZVI8	cDNA FLJ42529 fis, clone BRACE3002390 OS=Homo sapiens PE=2 SV=1 - [Q6ZVI8_HUMAN]	5.45	18.80	1	1	2	2	133	15.1	7.64
H3BU23	Cerebellar degeneration-related protein 2 (Fragment) OS=Homo sapiens GN=CDR2 PE=1 SV=1 - [H3BU23_HUMAN]	5.44	12.39	2	1	2	2	234	27.0	4.89
C9IZR6	Cell division cycle-associated 7-like protein (Fragment) OS=Homo sapiens GN=CDCA7L PE=1 SV=1 - [C9IZR6_HUMAN]	5.43	10.90	3	1	1	2	156	18.0	4.88
Q6ZPC3	cDNA FLJ26079 fis, clone RCT03187 OS=Homo sapiens PE=2 SV=1 - [Q6ZPC3_HUMAN]	5.43	12.03	1	1	1	2	133	13.9	8.87
Q24JP5	Transmembrane protein 132A OS=Homo sapiens GN=TMEM132A PE=1 SV=1 - [T132A_HUMAN]	5.43	4.11	2	2	2	2	1023	110.0	5.62
Q92995	Ubiquitin carboxyl-terminal hydrolase 13 OS=Homo sapiens GN=USP13 PE=1 SV=2 - [UBP13_HUMAN]	5.43	3.71	1	1	2	2	863	97.3	5.53
A0AUM3	HSF5 protein (Fragment) OS=Homo sapiens GN=HSF5 PE=2 SV=1 - [A0AUM3_HUMAN]	5.42	6.67	2	1	1	2	495	53.8	6.62
E5RIZ6	Ras GTPase-activating protein-binding protein 1 (Fragment) OS=Homo sapiens GN=G3BP1 PE=1 SV=1 - [E5RIZ6_HUMAN]	5.42	16.89	5	2	2	2	148	17.0	9.00
Q70CQ4	Ubiquitin carboxyl-terminal hydrolase 31 OS=Homo sapiens GN=USP31 PE=2 SV=2 - [UBP31_HUMAN]	5.40	3.70	1	1	2	2	1352	146.6	9.22
Q96L67	Nardilysin OS=Homo sapiens GN=NRD1 PE=2 SV=1 - [Q96L67_HUMAN]	5.40	4.01	9	1	2	2	948	108.4	5.03
Q9H461	Frizzled-8 OS=Homo sapiens GN=FZD8 PE=1 SV=1 - [FZD8_HUMAN]	5.40	5.76	1	2	2	2	694	73.3	8.19
J3KSG3	ADP-ribosylation factor-binding protein GGA3 (Fragment) OS=Homo sapiens GN=GGA3 PE=1 SV=1 - [J3KSG3_HUMAN]	5.39	16.91	6	1	2	2	136	15.7	5.96
P0C1S8	Wee1-like protein kinase 2 OS=Homo sapiens GN=WEE2 PE=2 SV=2 - [WEE2_HUMAN]	5.38	3.35	1	1	1	2	567	62.9	6.51
H7C4H4	X-linked retinitis pigmentosa GTPase regulator (Fragment) OS=Homo sapiens GN=RPGR PE=1 SV=8 - [H7C4H4_HUMAN]	5.38	12.68	4	1	1	2	142	15.9	4.50
F8VX48	Palmitoyltransferase ZDHHC17 (Fragment) OS=Homo sapiens GN=ZDHHC17 PE=1 SV=1 - [F8VX48_HUMAN]	5.37	19.88	1	1	2	2	161	18.1	8.40
Q659C4	La-related protein 1B OS=Homo sapiens GN=LARP1B PE=1 SV=2 - [LAR1B_HUMAN]	5.37	2.63	1	1	2	2	914	105.3	7.61
O43593	Lysine-specific demethylase hairless OS=Homo sapiens GN=HR PE=1 SV=5 - [HAIR_HUMAN]	5.36	3.53	1	1	2	2	1189	127.4	7.08
Q59HG6	Rho GTPase activating protein 6 isoform 1 variant (Fragment) OS=Homo sapiens PE=2 SV=1 - [Q59HG6_HUMAN]	5.36	3.29	2	1	2	2	729	79.7	8.97
V9GYY7	Synaptotagmin-6 (Fragment) OS=Homo sapiens GN=SYT6 PE=4 SV=1 - [V9GYY7_HUMAN]	5.36	42.05	5	1	2	2	88	9.7	9.41
B7Z5X7	cDNA FLJ50844, highly similar to Tryptophanyl-tRNA synthetase, mitochondrial (EC 6.1.1.2) OS=Homo sapiens PE=2 SV=1 - [B7Z5X7_HUMAN]	5.35	6.77	3	1	2	2	266	29.6	9.10
Q9Y615	Actin-like protein 7A OS=Homo sapiens GN=ACTL7A PE=1 SV=1 - [ACL7A_HUMAN]	5.35	4.60	1	1	1	2	435	48.6	7.09
Q86UK7	Zinc finger protein 598 OS=Homo sapiens GN=ZNF598 PE=1 SV=1 - [ZN598_HUMAN]	5.35	3.43	1	1	2	2	904	98.6	8.40
Q0D2N8	SARM1 protein (Fragment) OS=Homo sapiens GN=SARM1 PE=1 SV=1 - [Q0D2N8_HUMAN]	5.34	1.55	2	1	1	2	710	77.7	6.35
A0A087WT76	Polypeptide N-acetylgalactosaminyltransferase 12 (Fragment) OS=Homo sapiens GN=GALNT12 PE=4 SV=1 - [A0A087WT76_HUMAN]	5.34	38.71	1	1	1	2	31	3.6	9.00
A0A087WYX6	Disrupted in schizophrenia 1 protein OS=Homo sapiens GN=DISC1 PE=1 SV=1 - [A0A087WYX6_HUMAN]	5.34	3.14	9	1	2	2	732	79.7	6.84
D6RHX2	ELMO domain-containing protein 2 (Fragment) OS=Homo sapiens GN=ELMOD2 PE=1 SV=1 - [D6RHX2_HUMAN]	5.31	10.42	3	1	1	2	96	11.2	8.78
Q5T8R8	Uncharacterized protein C9orf66 OS=Homo sapiens GN=C9orf66 PE=2 SV=1 - [CI066_HUMAN]	5.31	10.17	2	1	2	2	295	31.2	11.77
Q6MZI0	Annexin (Fragment) OS=Homo sapiens GN=DKFZp686H02120 PE=2 SV=1 - [Q6MZI0_HUMAN]	5.30	11.61	8	1	1	2	112	12.7	8.38
Q5W0V3	Protein FAM160B1 OS=Homo sapiens GN=FAM160B1 PE=1 SV=1 - [F16B1_HUMAN]	5.30	2.35	1	1	1	2	765	86.5	5.29
B4DK09	Tetraspanin OS=Homo sapiens PE=2 SV=1 - [B4DK09_HUMAN]	5.29	11.24	8	1	2	2	249	28.2	8.75
S6CNF7	BTB and CNC homology 1, basic leucine zipper transcription factor 2 (Fragment) OS=Homo sapiens GN=Bach2 PE=2 SV=1 - [S6CNF7_HUMAN]	5.29	13.68	8	2	2	2	190	21.2	4.65
F8WDD6	Cation channel sperm-associated protein subunit gamma (Fragment) OS=Homo sapiens GN=CATSPERG PE=4 SV=2 - [F8WDD6_HUMAN]	5.28	9.09	6	1	1	2	165	18.6	7.05
B0QYK0	RNA-binding protein EWS OS=Homo sapiens GN=EWSR1 PE=1 SV=1 - [B0QYK0_HUMAN]	5.28	9.71	5	1	2	2	618	64.9	9.38
X6R4N5	Erythroid membrane-associated protein OS=Homo sapiens GN=ERMAP PE=1 SV=1 - [X6R4N5_HUMAN]	5.28	6.75	5	1	2	2	385	42.8	8.70
E5RFD1	Oxidation resistance protein 1 OS=Homo sapiens GN=OXR1 PE=1 SV=1 - [E5RFD1_HUMAN]	5.28	55.00	2	1	2	2	40	4.4	11.36
Q86TA1	MOB kinase activator 3B OS=Homo sapiens GN=MOB3B PE=1 SV=2 - [MOB3B_HUMAN]	5.27	6.02	1	1	2	2	216	25.4	8.43
D6RCT7	Kinesin-like protein KIF15 (Fragment) OS=Homo sapiens GN=KIF15 PE=1 SV=1 - [D6RCT7_HUMAN]	5.27	3.80	3	1	2	2	711	82.4	6.48
A0A0A0MRC1	Kin of IRRE-like protein 2 OS=Homo sapiens GN=KIRREL2 PE=4 SV=1 - [A0A0A0MRC1_HUMAN]	5.27	2.74	4	1	1	2	583	61.7	6.48
Q15850	Urf-ret protein OS=Homo sapiens GN=urf-ret PE=2 SV=1 - [Q15850_HUMAN]	5.27	2.07	2	1	1	2	435	49.5	6.87
Q5VXJ5	Synaptonemal complex protein 1 (Fragment) OS=Homo sapiens GN=SYCP1 PE=1 SV=1 - [Q5VXJ5_HUMAN]	5.27	1.64	5	1	1	2	792	93.1	5.34
Q9H2L5	Ras association domain-containing protein 4 OS=Homo sapiens GN=RASSF4 PE=1 SV=2 - [RASF4_HUMAN]	5.27	12.46	6	1	2	2	321	36.7	7.75
A8K7A2	cDNA FLJ78084, highly similar to Homo sapiens cell division cycle associated 8, mRNA OS=Homo sapiens PE=2 SV=1 - [A8K7A2_HUMAN]	5.26	10.36	2	1	2	2	280	31.3	9.86
H0YBX3	Reactive intermediate imine deaminase A homolog (Fragment) OS=Homo sapiens GN=RIDA PE=1 SV=1 - [H0YBX3_HUMAN]	5.25	22.83	1	2	2	2	127	13.8	9.31
A0A024R869	Golgi autoantigen, golgin subfamily a, 1, isoform CRA_a OS=Homo sapiens GN=GOLGA1 PE=4 SV=1 - [A0A024R869_HUMAN]	5.25	3.65	4	2	2	2	767	88.1	5.27
B4DTQ6	cDNA FLJ54883, highly similar to Unc-13 homolog D OS=Homo sapiens PE=2 SV=1 - [B4DTQ6_HUMAN]	5.24	3.71	4	2	2	2	944	106.4	6.87
C9JFK9	BAG family molecular chaperone regulator 3 (Fragment) OS=Homo sapiens GN=BAG3 PE=1 SV=1 - [C9JFK9_HUMAN]	5.24	5.23	1	2	2	2	325	34.7	9.39
Q9Y6H7	PhLOP2 OS=Homo sapiens PE=2 SV=1 - [Q9Y6H7_HUMAN]	5.24	12.82	1	1	1	2	117	13.7	10.32
Q96ED9	Protein Hook homolog 2 OS=Homo sapiens GN=HOOK2 PE=1 SV=3 - [HOOK2_HUMAN]	5.23	6.12	3	1	2	2	719	83.2	5.47
B2RC37	cDNA, FLJ95836, highly similar to Homo sapiens CD207 antigen, langerin (CD207), mRNA OS=Homo sapiens PE=2 SV=1 - [B2RC37_HUMAN]	5.23	4.27	2	1	1	2	328	36.7	8.27
Q05DM0	HMMR protein (Fragment) OS=Homo sapiens GN=HMMR PE=2 SV=1 - [Q05DM0_HUMAN]	5.23	4.88	7	1	2	2	512	59.1	5.71
Q8IZJ1	Netrin receptor UNC5B OS=Homo sapiens GN=UNC5B PE=1 SV=2 - [UNC5B_HUMAN]	5.22	3.81	1	1	2	2	945	103.6	6.02
Q9UQL5	DEAD-box protein p72 OS=Homo sapiens PE=2 SV=1 - [Q9UQL5_HUMAN]	5.22	9.84	1	1	1	2	183	19.2	9.70
Q13751	Laminin subunit beta-3 OS=Homo sapiens GN=LAMB3 PE=1 SV=1 - [LAMB3_HUMAN]	5.22	2.30	2	2	2	2	1172	129.5	7.21
Q15333	Hr44 protein (Fragment) OS=Homo sapiens GN=hr44 PE=2 SV=1 - [Q15333_HUMAN]	5.22	11.24	1	2	2	2	338	37.3	4.87
O43300	Leucine-rich repeat transmembrane neuronal protein 2 OS=Homo sapiens GN=LRRTM2 PE=2 SV=3 - [LRRT2_HUMAN]	5.22	8.14	1	1	2	2	516	59.0	8.00
K7EPU5	Sprouty-related, EVH1 domain-containing protein 3 OS=Homo sapiens GN=SPRED3 PE=4 SV=1 - [K7EPU5_HUMAN]	5.21	3.52	1	1	2	2	454	46.7	8.46
H3BSZ2	PR domain-containing protein 11 (Fragment) OS=Homo sapiens GN=PRDM11 PE=1 SV=1 - [H3BSZ2_HUMAN]	5.21	3.75	1	2	2	2	480	53.2	8.13
E7EUI8	Glucose-6-phosphate 1-dehydrogenase (Fragment) OS=Homo sapiens GN=G6PD PE=1 SV=8 - [E7EUI8_HUMAN]	5.20	11.83	10	2	2	2	338	38.4	6.55
B7Z843	cDNA FLJ59794, highly similar to Carboxypeptidase D (EC 3.4.17.22) OS=Homo sapiens PE=2 SV=1 - [B7Z843_HUMAN]	5.20	5.41	2	1	2	2	905	101.2	5.77
H0Y2S1	Putative GTP-binding protein 6 OS=Homo sapiens GN=GTPBP6 PE=1 SV=2 - [H0Y2S1_HUMAN]	5.19	5.43	4	2	2	2	516	56.9	9.42
Q8NHG8	E3 ubiquitin-protein ligase ZNRF2 OS=Homo sapiens GN=ZNRF2 PE=1 SV=1 - [ZNRF2_HUMAN]	5.19	6.61	2	1	2	2	242	24.1	7.09
Q7RTP0	Magnesium transporter NIPA1 OS=Homo sapiens GN=NIPA1 PE=1 SV=1 - [NIPA1_HUMAN]	5.19	6.38	1	1	1	2	329	34.5	8.37
Q8IV36	Protein HID1 OS=Homo sapiens GN=HID1 PE=1 SV=1 - [HID1_HUMAN]	5.19	5.46	5	2	2	2	788	88.7	6.06
A0A024QZB1	Histone-lysine N-methyltransferase OS=Homo sapiens GN=hCG_1998636 PE=4 SV=1 - [A0A024QZB1_HUMAN]	5.19	3.37	2	2	2	2	1010	111.4	5.35
Q9H9J7	cDNA FLJ12692 fis, clone NT2RM4002623, weakly similar to ASPARTYL-TRNA SYNTHETASE (EC 6.1.1.12) OS=Homo sapiens PE=2 SV=1 - [Q9H9J7_HUMAN]	5.19	2.81	4	1	1	2	463	52.6	6.60
A5PLK7	RCC2 protein (Fragment) OS=Homo sapiens GN=RCC2 PE=2 SV=1 - [A5PLK7_HUMAN]	5.19	7.00	2	2	2	2	457	49.6	8.69
O15068	Guanine nucleotide exchange factor DBS OS=Homo sapiens GN=MCF2L PE=1 SV=2 - [MCF2L_HUMAN]	5.18	2.64	3	1	2	2	1137	128.0	6.43
P12270	Nucleoprotein TPR OS=Homo sapiens GN=TPR PE=1 SV=3 - [TPR_HUMAN]	5.18	1.18	4	1	2	2	2363	267.1	5.02
A0A0G2JL69	Complement C2 OS=Homo sapiens GN=C2 PE=1 SV=1 - [A0A0G2JL69_HUMAN]	5.18	2.07	2	1	1	2	723	80.1	7.46
A0A0A0MRN4	DBIRD complex subunit ZNF326 OS=Homo sapiens GN=ZNF326 PE=1 SV=1 - [A0A0A0MRN4_HUMAN]	5.17	8.92	2	2	2	2	493	55.5	5.05
H7C1S2	Bifunctional purine biosynthesis protein PURH (Fragment) OS=Homo sapiens GN=ATIC PE=1 SV=1 - [H7C1S2_HUMAN]	5.17	7.79	4	1	1	2	231	26.0	6.93
B2R8X4	cDNA, FLJ94105, highly similar to Homo sapiens GA binding protein transcription factor, alpha subunit 60kDa (GABPA), mRNA OS=Homo sapiens PE=2 SV=1 - [B2R8X4_HUMAN]	5.16	2.86	4	1	2	2	454	51.2	4.97
Q6PIF6	Unconventional myosin-VIIb OS=Homo sapiens GN=MYO7B PE=1 SV=2 - [MYO7B_HUMAN]	5.16	1.04	1	2	2	2	2116	241.4	8.57
A8K6Y1	cDNA FLJ75526, highly similar to Homo sapiens proliferation-associated 2G4, 38kDa (PA2G4), mRNA (Fragment) OS=Homo sapiens PE=2 SV=1 - [A8K6Y1_HUMAN]	5.16	6.81	7	2	2	3	367	40.9	6.40
E7EWF4	Fibroblast growth factor receptor 4 (Fragment) OS=Homo sapiens GN=FGFR4 PE=1 SV=1 - [E7EWF4_HUMAN]	5.15	20.40	8	2	2	2	201	22.2	8.12
Q92538	Golgi-specific brefeldin A-resistance guanine nucleotide exchange factor 1 OS=Homo sapiens GN=GBF1 PE=1 SV=2 - [GBF1_HUMAN]	5.15	1.61	1	2	2	2	1859	206.3	5.73
Q15070	Mitochondrial inner membrane protein OXA1L OS=Homo sapiens GN=OXA1L PE=1 SV=3 - [OXA1L_HUMAN]	5.15	2.76	4	1	1	2	435	48.5	9.45
B4DGJ5	RNA polymerase II-associated factor 1 homolog OS=Homo sapiens GN=PAF1 PE=1 SV=1 - [B4DGJ5_HUMAN]	5.15	13.19	1	2	2	2	288	32.9	4.91
A8K4A0	cDNA FLJ76497, highly similar to Homo sapiens arylsulfatase B (ARSB), transcript variant 2, mRNA OS=Homo sapiens PE=2 SV=1 - [A8K4A0_HUMAN]	5.15	3.87	2	1	1	2	413	46.0	8.34
H7C216	DCN1-like protein (Fragment) OS=Homo sapiens GN=DCUN1D2 PE=1 SV=1 - [H7C216_HUMAN]	5.15	9.84	4	2	2	2	244	27.9	9.89
Q9NP58	ATP-binding cassette sub-family B member 6, mitochondrial OS=Homo sapiens GN=ABCB6 PE=1 SV=1 - [ABCB6_HUMAN]	5.15	5.82	7	2	2	2	842	93.8	8.48
A0A0U1RRC9	Ubiquitin-associated and SH3 domain-containing protein A OS=Homo sapiens GN=UBASH3A PE=1 SV=1 - [A0A0U1RRC9_HUMAN]	5.14	4.61	3	1	2	2	521	58.4	7.43
Q9NZZ3	Charged multivesicular body protein 5 OS=Homo sapiens GN=CHMP5 PE=1 SV=1 - [CHMP5_HUMAN]	5.14	11.42	1	1	2	2	219	24.6	4.83
Q9Y6N6	Laminin subunit gamma-3 OS=Homo sapiens GN=LAMC3 PE=1 SV=3 - [LAMC3_HUMAN]	5.13	1.59	1	1	2	2	1575	171.1	6.58
P98168	Zinc finger X-linked protein ZXDA OS=Homo sapiens GN=ZXDA PE=1 SV=2 - [ZXDA_HUMAN]	5.13	5.38	2	1	2	2	799	84.7	7.52
A0A024R520	Synaptotagmin VII, isoform CRA_b OS=Homo sapiens GN=SYT7 PE=4 SV=1 - [A0A024R520_HUMAN]	5.13	8.82	3	2	2	2	465	52.2	9.51
F4MHG8	Ubiquitously transcribed tetratricopeptide repeat protein Y-linked transcript variant 203 OS=Homo sapiens GN=UTY PE=2 SV=1 - [F4MHG8_HUMAN]	5.12	4.92	64	1	2	2	792	86.2	7.78
Q5TZK3	Protein FAM74A4/A6 OS=Homo sapiens GN=FAM74A4 PE=1 SV=1 - [FAM74_HUMAN]	5.12	12.20	2	2	2	2	123	14.8	10.64
L8E9L7	Alternative protein WDR63 OS=Homo sapiens GN=WDR63 PE=4 SV=1 - [L8E9L7_HUMAN]	5.12	58.33	1	2	2	2	72	8.4	10.17
Q86W28	NACHT, LRR and PYD domains-containing protein 8 OS=Homo sapiens GN=NLRP8 PE=2 SV=2 - [NALP8_HUMAN]	5.12	3.72	1	2	2	2	1048	119.4	7.96
E7ER60	Synaptojanin-2 OS=Homo sapiens GN=SYNJ2 PE=1 SV=2 - [E7ER60_HUMAN]	5.11	1.67	1	1	1	2	839	92.2	6.79
Q16572	Vesicular acetylcholine transporter OS=Homo sapiens GN=SLC18A3 PE=1 SV=2 - [VACHT_HUMAN]	5.11	7.52	1	1	2	2	532	56.9	6.19
O60930	Ribonuclease H1 OS=Homo sapiens GN=RNASEH1 PE=1 SV=2 - [RNH1_HUMAN]	5.11	8.74	3	1	2	2	286	32.0	9.16
O60518	Ran-binding protein 6 OS=Homo sapiens GN=RANBP6 PE=1 SV=2 - [RNBP6_HUMAN]	5.11	2.71	2	1	2	2	1105	124.6	5.01
B7Z8G4	cDNA FLJ59648, highly similar to Dysferlin OS=Homo sapiens PE=2 SV=1 - [B7Z8G4_HUMAN]	5.10	3.32	4	1	2	2	844	96.9	5.68
Q7Z606	Breast and ovarian cancer susceptibility protein (Fragment) OS=Homo sapiens GN=BRCA1 PE=4 SV=1 - [Q7Z606_HUMAN]	5.10	2.72	14	1	2	2	1141	127.0	5.77
A0A0A0MTH5	Dual-specificity tyrosine-phosphorylation-regulated kinase 4 OS=Homo sapiens GN=DYRK4 PE=4 SV=1 - [A0A0A0MTH5_HUMAN]	5.10	4.10	4	2	2	2	634	72.5	9.48
Q8WTW3	Conserved oligomeric Golgi complex subunit 1 OS=Homo sapiens GN=COG1 PE=1 SV=1 - [COG1_HUMAN]	5.10	2.55	5	2	2	2	980	108.9	7.31
B3KSQ6	cDNA FLJ36801 fis, clone ADRGL2007810, highly similar to NADPH:adrenodoxin oxidoreductase, mitochondrial (EC 1.18.1.2) OS=Homo sapiens PE=2 SV=1 - [B3KSQ6_HUMAN]	5.10	6.82	1	1	2	2	381	41.5	8.69
K7EPU5	Sprouty-related, EVH1 domain-containing protein 3 OS=Homo sapiens GN=SPRED3 PE=4 SV=1 - [K7EPU5_HUMAN]	5.09	11.45	5	1	2	2	454	46.7	8.46
B3KRZ1	cDNA FLJ35128 fis, clone PLACE6008768, moderately similar to Insulin-like growth factor-binding protein 3 OS=Homo sapiens PE=2 SV=1 - [B3KRZ1_HUMAN]	5.09	11.55	10	2	2	2	277	30.3	9.66
J3QL56	Protein SCO1 homolog, mitochondrial OS=Homo sapiens GN=SCO1 PE=1 SV=1 - [J3QL56_HUMAN]	5.09	17.04	2	2	2	2	270	30.2	9.57
A0A0C4DGZ5	Tyrosine--tRNA ligase OS=Homo sapiens GN=YARS PE=1 SV=1 - [A0A0C4DGZ5_HUMAN]	5.08	6.44	2	1	2	2	388	43.9	8.65
E5RJA7	Matrix metalloproteinase-16 (Fragment) OS=Homo sapiens GN=MMP16 PE=4 SV=1 - [E5RJA7_HUMAN]	5.08	9.52	2	1	1	2	168	19.5	10.24
A8K8R2	cDNA FLJ77381, highly similar to Homo sapiens cation channel, sperm associated 3 (CATSPER3), mRNA OS=Homo sapiens PE=2 SV=1 - [A8K8R2_HUMAN]	5.08	10.55	2	1	2	2	398	46.4	6.30
P29084	Transcription initiation factor IIE subunit beta OS=Homo sapiens GN=GTF2E2 PE=1 SV=1 - [T2EB_HUMAN]	5.08	8.93	3	2	2	2	291	33.0	9.66
H0Y5F2	Uncharacterized protein C1orf167 (Fragment) OS=Homo sapiens GN=C1orf167 PE=1 SV=1 - [H0Y5F2_HUMAN]	5.08	4.55	5	2	2	2	616	68.4	11.33
Q14690	Protein RRP5 homolog OS=Homo sapiens GN=PDCD11 PE=1 SV=3 - [RRP5_HUMAN]	5.08	1.71	2	2	2	2	1871	208.6	8.87
B4DYR8	cDNA FLJ56473, highly similar to Zinc finger and BTB domain-containing protein 38 OS=Homo sapiens PE=2 SV=1 - [B4DYR8_HUMAN]	5.08	2.09	4	2	2	2	1196	134.2	8.03
I3L4J1	Uncharacterized protein (Fragment) OS=Homo sapiens PE=1 SV=3 - [I3L4J1_HUMAN]	5.08	5.84	6	2	2	2	428	48.0	7.53
G3V1T4	Nuclear pore complex protein Nup107 OS=Homo sapiens GN=NUP107 PE=1 SV=1 - [G3V1T4_HUMAN]	5.07	39.81	1	1	2	2	103	11.3	11.39
Q9Y4B6	Protein VPRBP OS=Homo sapiens GN=VPRBP PE=1 SV=3 - [VPRBP_HUMAN]	5.07	1.99	1	2	2	2	1507	168.9	5.06
Q8WVQ1	Soluble calcium-activated nucleotidase 1 OS=Homo sapiens GN=CANT1 PE=1 SV=1 - [CANT1_HUMAN]	5.07	2.99	1	1	1	2	401	44.8	6.09
E9PIN3	Nuclear RNA export factor 1 (Fragment) OS=Homo sapiens GN=NXF1 PE=1 SV=1 - [E9PIN3_HUMAN]	5.07	6.47	3	2	2	2	603	68.1	8.90
F8VZQ9	SAP domain-containing ribonucleoprotein OS=Homo sapiens GN=SARNP PE=1 SV=1 - [F8VZQ9_HUMAN]	5.07	16.43	4	1	2	2	213	24.1	5.30
Q8NDV3	Structural maintenance of chromosomes protein 1B OS=Homo sapiens GN=SMC1B PE=2 SV=2 - [SMC1B_HUMAN]	5.06	3.24	1	1	2	2	1235	143.8	7.66
A2N2G5	VH87-2 protein (Fragment) OS=Homo sapiens GN=VH87-2 PE=2 SV=1 - [A2N2G5_HUMAN]	5.06	12.59	6	1	2	2	135	14.5	8.79
E9PIJ7	Tyrosine-protein kinase Fes/Fps OS=Homo sapiens GN=FES PE=1 SV=1 - [E9PIJ7_HUMAN]	5.06	4.77	5	1	2	2	545	62.2	6.54
D3DTF8	Apelin, AGTRL1 ligand, isoform CRA_a OS=Homo sapiens GN=APLN PE=4 SV=1 - [D3DTF8_HUMAN]	5.06	42.31	2	2	2	2	130	13.7	8.54
Q5SY74	Kinetochore-associated protein NSL1 homolog OS=Homo sapiens GN=NSL1 PE=1 SV=1 - [Q5SY74_HUMAN]	5.06	28.49	4	1	2	2	172	19.5	4.98
A2RU34	CNTNAP3 protein OS=Homo sapiens GN=CNTNAP3 PE=2 SV=1 - [A2RU34_HUMAN]	5.06	3.23	6	1	2	2	1207	132.1	7.65
Q59EE7	Pro-alpha-1 type V collagen variant (Fragment) OS=Homo sapiens PE=2 SV=1 - [Q59EE7_HUMAN]	5.06	1.62	3	1	1	2	1792	178.4	5.00
Q9Y232	Chromodomain Y-like protein OS=Homo sapiens GN=CDYL PE=1 SV=2 - [CDYL1_HUMAN]	5.05	5.02	1	2	2	4	598	66.4	9.45
H3BNG0	Chromosome 15 open reading frame 17, isoform CRA_b OS=Homo sapiens GN=FAM219B PE=1 SV=1 - [H3BNG0_HUMAN]	5.05	27.40	7	2	2	2	73	7.6	11.93
Q59H91	Inositol 1,4,5-trisphosphate receptor type 1 variant (Fragment) OS=Homo sapiens PE=2 SV=1 - [Q59H91_HUMAN]	5.05	3.48	2	2	2	2	1207	136.3	5.74
Q9NXR9	cDNA FLJ20087 fis, clone COL03793 OS=Homo sapiens PE=2 SV=1 - [Q9NXR9_HUMAN]	5.05	3.43	2	1	2	2	758	85.9	8.06
J3QLR2	Septin-4 (Fragment) OS=Homo sapiens GN=SEPT4 PE=1 SV=1 - [J3QLR2_HUMAN]	5.05	18.36	19	1	2	2	207	23.2	7.11
Q5ZGJ2	BV17S1J1.2 protein (Fragment) OS=Homo sapiens GN=BV17S1J1.2 PE=4 SV=1 - [Q5ZGJ2_HUMAN]	5.04	14.77	7	1	1	2	88	10.0	8.69
E9PDR3	Voltage-dependent N-type calcium channel subunit alpha OS=Homo sapiens GN=CACNA1B PE=1 SV=3 - [E9PDR3_HUMAN]	5.04	1.61	7	1	2	2	2237	251.6	8.51
B0R0U3	N-lysine methyltransferase SMYD2 (Fragment) OS=Homo sapiens GN=SMYD2 PE=1 SV=2 - [B0R0U3_HUMAN]	5.04	11.22	4	1	1	2	98	11.4	6.52
M0R0Q7	DNA ligase OS=Homo sapiens GN=LIG1 PE=1 SV=1 - [M0R0Q7_HUMAN]	5.04	4.13	9	1	2	2	800	88.3	5.91
Q9HA92	Radical S-adenosyl methionine domain-containing protein 1, mitochondrial OS=Homo sapiens GN=RSAD1 PE=2 SV=2 - [RSAD1_HUMAN]	5.04	5.88	4	2	2	2	442	48.7	7.78
Q96HN9	Putative uncharacterized protein (Fragment) OS=Homo sapiens PE=2 SV=1 - [Q96HN9_HUMAN]	5.03	4.71	5	2	2	2	594	67.1	8.94
Q8IY13	FBLN7 protein (Fragment) OS=Homo sapiens GN=FBLN7 PE=1 SV=1 - [Q8IY13_HUMAN]	5.03	4.98	1	1	1	2	261	28.0	7.83
P55036	26S proteasome non-ATPase regulatory subunit 4 OS=Homo sapiens GN=PSMD4 PE=1 SV=1 - [PSMD4_HUMAN]	5.03	13.26	4	2	2	2	377	40.7	4.79
Q5VWI1	Transcription elongation regulator 1-like protein OS=Homo sapiens GN=TCERG1L PE=2 SV=2 - [TCRGL_HUMAN]	5.03	6.14	1	1	2	2	586	65.6	9.83
Q6PJ72	LRP1 protein OS=Homo sapiens GN=LRP1 PE=1 SV=1 - [Q6PJ72_HUMAN]	5.03	7.52	1	1	2	2	439	48.1	5.00
B4DLJ1	Upstream stimulatory factor 2 OS=Homo sapiens GN=USF2 PE=1 SV=1 - [B4DLJ1_HUMAN]	5.02	5.73	1	2	2	2	349	36.6	5.57
Q9Y4K3	TNF receptor-associated factor 6 OS=Homo sapiens GN=TRAF6 PE=1 SV=1 - [TRAF6_HUMAN]	5.02	4.21	1	1	2	2	522	59.5	6.44
A0A024RD40	Tumor necrosis factor receptor superfamily, member 21, isoform CRA_a OS=Homo sapiens GN=TNFRSF21 PE=4 SV=1 - [A0A024RD40_HUMAN]	5.02	5.06	4	2	2	2	632	68.7	8.57
A0A5E8	GAS2-like protein 1 OS=Homo sapiens GN=GAS2L1 PE=1 SV=1 - [A0A5E8_HUMAN]	5.02	5.58	3	1	2	2	681	72.6	10.05
B3KP28	cDNA FLJ31026 fis, clone HLUNG2000549, highly similar to Ubiquitin carboxyl-terminal hydrolase 11 (EC 3.1.2.15) OS=Homo sapiens PE=2 SV=1 - [B3KP28_HUMAN]	5.02	6.53	5	1	2	2	689	78.9	5.58
P35354	Prostaglandin G/H synthase 2 OS=Homo sapiens GN=PTGS2 PE=1 SV=2 - [PGH2_HUMAN]	5.02	3.97	1	1	2	2	604	69.0	7.39
Q16804	Cytochrome P450db1 (Fragment) OS=Homo sapiens PE=2 SV=1 - [Q16804_HUMAN]	5.02	11.26	43	2	2	2	373	42.0	6.84
B4DMR3	cDNA FLJ51896, highly similar to Glia-derived nexin OS=Homo sapiens PE=2 SV=1 - [B4DMR3_HUMAN]	5.02	3.89	3	1	1	2	334	37.1	9.52
Q14674	Separin OS=Homo sapiens GN=ESPL1 PE=1 SV=3 - [ESPL1_HUMAN]	5.02	1.27	1	1	2	2	2120	233.0	7.55
A0A0S2Z4X4	Methylmalonyl CoA mutase isoform 2 OS=Homo sapiens GN=MUT PE=2 SV=1 - [A0A0S2Z4X4_HUMAN]	5.02	5.44	4	2	2	2	680	75.5	7.39
Q6ZN28	Metastasis-associated in colon cancer protein 1 OS=Homo sapiens GN=MACC1 PE=1 SV=2 - [MACC1_HUMAN]	5.02	4.93	1	2	2	2	852	96.6	6.90
P31944	Caspase-14 OS=Homo sapiens GN=CASP14 PE=1 SV=2 - [CASPE_HUMAN]	5.01	4.55	1	1	1	2	242	27.7	5.58
B4DXD1	cDNA FLJ51135, highly similar to Ribonucleoside-diphosphate reductase large subunit (EC 1.17.4.1) OS=Homo sapiens PE=2 SV=1 - [B4DXD1_HUMAN]	5.01	6.17	8	2	2	2	454	52.0	6.16
P51812	Ribosomal protein S6 kinase alpha-3 OS=Homo sapiens GN=RPS6KA3 PE=1 SV=1 - [KS6A3_HUMAN]	5.01	4.86	5	2	2	2	740	83.7	6.89
F8WBD0	Selenoprotein T OS=Homo sapiens GN=SELENOT PE=1 SV=1 - [F8WBD0_HUMAN]	5.01	28.89	3	1	1	2	45	4.9	11.06
A2VCT1	LCOR protein (Fragment) OS=Homo sapiens GN=LCOR PE=2 SV=1 - [A2VCT1_HUMAN]	5.01	9.70	2	1	2	2	268	28.6	9.35
A0A0J9YY22	PRAME family member 19 OS=Homo sapiens GN=PRAMEF19 PE=4 SV=1 - [A0A0J9YY22_HUMAN]	5.01	3.76	5	1	1	2	479	55.3	7.94
Q9H8B7	cDNA FLJ13786 fis, clone PLACE4000654, highly similar to Mus musculus ubiquitin conjugating enzyme OS=Homo sapiens PE=2 SV=1 - [Q9H8B7_HUMAN]	5.01	1.61	2	2	2	2	1867	204.0	6.60
Q59GS6	Diacylglycerol kinase (Fragment) OS=Homo sapiens PE=2 SV=1 - [Q59GS6_HUMAN]	5.01	6.78	4	1	2	2	605	68.3	6.07
A0A0G2JRD1	RNA-binding protein fox-1 homolog 2 (Fragment) OS=Homo sapiens GN=RBFOX2 PE=1 SV=1 - [A0A0G2JRD1_HUMAN]	5.01	6.61	24	1	2	2	227	23.5	9.61
C9JIY9	Nucleoporin NUP53 (Fragment) OS=Homo sapiens GN=NUP35 PE=1 SV=1 - [C9JIY9_HUMAN]	5.01	43.42	8	2	2	3	76	7.7	10.27
Q5U0H8	Myelin protein zero-like 1 OS=Homo sapiens PE=2 SV=1 - [Q5U0H8_HUMAN]	5.00	6.32	1	1	1	2	269	29.1	8.72
P00491	Purine nucleoside phosphorylase OS=Homo sapiens GN=PNP PE=1 SV=2 - [PNPH_HUMAN]	5.00	4.84	2	1	1	2	289	32.1	6.95
Q9UII4	E3 ISG15--protein ligase HERC5 OS=Homo sapiens GN=HERC5 PE=1 SV=2 - [HERC5_HUMAN]	5.00	3.22	1	2	2	2	1024	116.8	7.65
H7C0J8	Leucine-rich repeat and calponin homology domain-containing protein 3 (Fragment) OS=Homo sapiens GN=LRCH3 PE=1 SV=1 - [H7C0J8_HUMAN]	5.00	19.38	6	2	2	2	227	24.8	6.92
Q32M78	Zinc finger protein 699 OS=Homo sapiens GN=ZNF699 PE=1 SV=1 - [ZN699_HUMAN]	5.00	3.27	1	1	2	2	642	73.9	8.24
Q6ZT12	E3 ubiquitin-protein ligase UBR3 OS=Homo sapiens GN=UBR3 PE=2 SV=2 - [UBR3_HUMAN]	4.99	2.12	2	1	2	2	1888	212.3	6.10
Q8IW08	Gamma-aminobutyric acid (GABA) B receptor, 1 OS=Homo sapiens GN=GABBR1 PE=2 SV=1 - [Q8IW08_HUMAN]	4.99	5.57	7	2	2	2	844	95.1	8.51
H0Y901	Ladinin-1 (Fragment) OS=Homo sapiens GN=LAD1 PE=1 SV=1 - [H0Y901_HUMAN]	4.99	13.02	5	2	2	2	192	21.5	9.92
B7Z7Y7	cDNA FLJ55813, highly similar to DNA-binding protein RFX2 OS=Homo sapiens PE=2 SV=1 - [B7Z7Y7_HUMAN]	4.99	9.28	4	1	2	2	474	53.6	6.73
H0Y2X5	Aldehyde dehydrogenase 1 family, member A3, isoform CRA_b OS=Homo sapiens GN=ALDH1A3 PE=1 SV=1 - [H0Y2X5_HUMAN]	4.98	6.17	4	1	2	2	405	44.2	7.56
Q59EX1	ADAM 32 (A disintegrin and metalloprotease domain 32) variant (Fragment) OS=Homo sapiens PE=2 SV=1 - [Q59EX1_HUMAN]	4.98	15.41	11	1	2	2	279	32.1	4.84
A8K4P8	cDNA FLJ75337 OS=Homo sapiens PE=2 SV=1 - [A8K4P8_HUMAN]	4.98	1.64	4	1	2	2	1524	170.4	7.31
B3KX98	cDNA FLJ45012 fis, clone BRAWH3013264, highly similar to Homo sapiens SNF2 histone linker PHD RING helicase (SHPRH), mRNA OS=Homo sapiens PE=2 SV=1 - [B3KX98_HUMAN]	4.98	4.42	1	1	2	2	882	100.9	7.68
O94812	BAI1-associated protein 3 OS=Homo sapiens GN=BAIAP3 PE=1 SV=2 - [BAIP3_HUMAN]	4.97	3.20	2	1	2	2	1187	131.8	6.37
Q96E14	RecQ-mediated genome instability protein 2 OS=Homo sapiens GN=RMI2 PE=1 SV=2 - [RMI2_HUMAN]	4.97	6.80	1	1	1	2	147	15.9	7.90
B2RUW4	Chromosome 10 open reading frame 93 OS=Homo sapiens GN=C10orf93 PE=2 SV=1 - [B2RUW4_HUMAN]	4.97	8.36	1	1	2	2	347	40.4	8.31
O15354	Prosaposin receptor GPR37 OS=Homo sapiens GN=GPR37 PE=1 SV=2 - [GPR37_HUMAN]	4.96	4.57	1	2	2	2	613	67.1	8.27
P61006	Ras-related protein Rab-8A OS=Homo sapiens GN=RAB8A PE=1 SV=1 - [RAB8A_HUMAN]	4.96	12.56	1	2	2	2	207	23.7	9.07
B4E0J9	cDNA FLJ57348, highly similar to Homo sapiens hexokinase domain containing 1 (HKDC1), mRNA OS=Homo sapiens PE=2 SV=1 - [B4E0J9_HUMAN]	4.96	3.97	4	1	2	2	780	86.6	7.46
Q8NH68	Olfactory receptor OS=Homo sapiens PE=3 SV=1 - [Q8NH68_HUMAN]	4.96	6.41	1	1	2	2	312	34.9	8.81
J3KRZ1	Probable ATP-dependent RNA helicase DDX5 (Fragment) OS=Homo sapiens GN=DDX5 PE=1 SV=1 - [J3KRZ1_HUMAN]	4.96	15.06	2	1	2	2	166	18.9	5.66
G5E9V5	28S ribosomal protein S22, mitochondrial OS=Homo sapiens GN=MRPS22 PE=1 SV=1 - [G5E9V5_HUMAN]	4.96	11.42	1	1	2	2	359	41.2	7.90
Q8NE73	ENTPD4 protein OS=Homo sapiens GN=ENTPD4 PE=1 SV=1 - [Q8NE73_HUMAN]	4.96	4.73	4	2	2	2	571	64.8	8.06
E5RK97	Cytoplasmic dynein 2 light intermediate chain 1 OS=Homo sapiens GN=DYNC2LI1 PE=4 SV=1 - [E5RK97_HUMAN]	4.95	16.00	1	1	1	2	75	8.6	10.08
Q86UP4	Interferon alpha 2b OS=Homo sapiens PE=2 SV=1 - [Q86UP4_HUMAN]	4.95	7.83	2	1	1	2	166	19.4	6.33
A6NHR2	39S ribosomal protein L37, mitochondrial OS=Homo sapiens GN=MRPL37 PE=1 SV=2 - [A6NHR2_HUMAN]	4.95	4.11	2	1	1	2	292	32.5	9.36
Q6ZNW9	cDNA FLJ26980 fis, clone SLV02741 OS=Homo sapiens PE=2 SV=1 - [Q6ZNW9_HUMAN]	4.95	10.34	1	1	2	2	232	27.2	9.80
Q8TF47	Zinc finger protein 90 homolog OS=Homo sapiens GN=ZFP90 PE=1 SV=2 - [ZFP90_HUMAN]	4.95	5.50	1	2	2	2	636	73.0	8.06
G0Z2K6	MHC class I antigen (Fragment) OS=Homo sapiens GN=HLA-B PE=3 SV=1 - [G0Z2K6_HUMAN]	4.95	4.76	1	1	1	2	273	31.6	5.96
Q99988	Growth/differentiation factor 15 OS=Homo sapiens GN=GDF15 PE=1 SV=3 - [GDF15_HUMAN]	4.95	9.42	1	1	2	2	308	34.1	9.66
Q86XU0	Zinc finger protein 677 OS=Homo sapiens GN=ZNF677 PE=2 SV=1 - [ZN677_HUMAN]	4.94	5.82	1	2	2	2	584	68.0	9.13
E9PRL9	Chitinase-3-like protein 2 (Fragment) OS=Homo sapiens GN=CHI3L2 PE=1 SV=1 - [E9PRL9_HUMAN]	4.94	9.02	9	1	1	2	122	13.9	8.94
Q5U071	High-mobility group box 2 OS=Homo sapiens PE=2 SV=1 - [Q5U071_HUMAN]	4.94	6.73	2	1	1	2	208	23.9	8.13
Q5JB53	Proliferation-inducing gene 6 (Fragment) OS=Homo sapiens PE=2 SV=1 - [Q5JB53_HUMAN]	4.94	1.96	4	1	1	2	766	83.2	5.94
C9K0F9	Histone acetyltransferase (Fragment) OS=Homo sapiens GN=KAT6A PE=1 SV=1 - [C9K0F9_HUMAN]	4.93	3.85	1	1	2	2	728	84.1	6.55
O43432	Eukaryotic translation initiation factor 4 gamma 3 OS=Homo sapiens GN=EIF4G3 PE=1 SV=2 - [IF4G3_HUMAN]	4.93	1.83	9	1	2	2	1585	176.5	5.38
F8W732	Zinc finger protein 366 (Fragment) OS=Homo sapiens GN=ZNF366 PE=4 SV=1 - [F8W732_HUMAN]	4.93	18.75	4	1	2	2	64	7.4	8.84
H7BXI1	Extended synaptotagmin-2 (Fragment) OS=Homo sapiens GN=ESYT2 PE=1 SV=1 - [H7BXI1_HUMAN]	4.93	3.28	3	2	2	2	884	97.9	8.57
A0A0A6YYK7	T cell receptor alpha variable 19 (Fragment) OS=Homo sapiens GN=TRAV19 PE=4 SV=5 - [A0A0A6YYK7_HUMAN]	4.93	23.28	2	2	2	2	116	13.2	4.77
A0A0B4J233	Retinol-binding protein 5 OS=Homo sapiens GN=RBP5 PE=1 SV=1 - [A0A0B4J233_HUMAN]	4.93	13.40	1	1	1	2	97	11.0	8.16
H0YHL7	Coronin-1C (Fragment) OS=Homo sapiens GN=CORO1C PE=1 SV=1 - [H0YHL7_HUMAN]	4.93	6.06	12	1	1	2	165	18.7	8.38
Q6NX55	Chromosome 19 open reading frame 2 OS=Homo sapiens GN=C19orf2 PE=2 SV=1 - [Q6NX55_HUMAN]	4.93	4.86	3	1	2	2	494	55.4	5.26
Q9NRW8	Neurofibromatosis type 2 (Fragment) OS=Homo sapiens GN=NF2 PE=4 SV=1 - [Q9NRW8_HUMAN]	4.93	42.11	8	2	2	2	38	4.3	9.04
A0A090N8G0	Glycyl-tRNA synthetase OS=Homo sapiens GN=GARS PE=4 SV=1 - [A0A090N8G0_HUMAN]	4.93	3.80	2	1	2	2	685	77.5	6.24
B4E061	cDNA FLJ51170, highly similar to DNA topoisomerase I, mitochondrial (EC 5.99.1.2) OS=Homo sapiens PE=2 SV=1 - [B4E061_HUMAN]	4.93	5.03	11	1	2	2	477	53.4	8.78
A8KAE4	cDNA FLJ75520 OS=Homo sapiens PE=2 SV=1 - [A8KAE4_HUMAN]	4.93	3.85	3	2	2	2	1194	131.2	7.62
Q6IAJ3	TMEM9 protein OS=Homo sapiens GN=TMEM9 PE=2 SV=1 - [Q6IAJ3_HUMAN]	4.93	7.10	5	1	1	2	183	20.5	6.96
B4DVZ0	cDNA FLJ50253, highly similar to Heat shock 70 kDa protein 12B OS=Homo sapiens PE=2 SV=1 - [B4DVZ0_HUMAN]	4.93	3.83	6	1	2	2	600	66.8	8.95
A0A024R254	Melanoma antigen family D, 1, isoform CRA_a OS=Homo sapiens GN=MAGED1 PE=4 SV=1 - [A0A024R254_HUMAN]	4.92	5.14	3	1	2	2	778	86.1	5.83
Q8WTV1	THAP domain-containing protein 3 OS=Homo sapiens GN=THAP3 PE=1 SV=1 - [THAP3_HUMAN]	4.92	5.02	1	1	1	2	239	27.0	10.24
B7Z8G0	cDNA FLJ58964 OS=Homo sapiens PE=2 SV=1 - [B7Z8G0_HUMAN]	4.92	10.69	8	1	2	2	318	34.7	10.27
C9J3I0	DNA-binding protein SATB1 (Fragment) OS=Homo sapiens GN=SATB1 PE=1 SV=8 - [C9J3I0_HUMAN]	4.92	57.14	8	2	2	2	70	7.5	10.11
B4E2I4	cDNA FLJ58227, highly similar to Glutamate--cysteine ligase catalytic subunit (EC 6.3.2.2) OS=Homo sapiens PE=2 SV=1 - [B4E2I4_HUMAN]	4.92	1.88	3	1	1	2	584	66.4	5.66
Q96RG4	Insulin receptor substrate 2 insertion mutant (Fragment) OS=Homo sapiens GN=IRS2 PE=4 SV=1 - [Q96RG4_HUMAN]	4.92	2.54	3	1	2	2	1338	137.2	8.69
C9JZN9	Troponin T, fast skeletal muscle OS=Homo sapiens GN=TNNT3 PE=1 SV=1 - [C9JZN9_HUMAN]	4.92	9.21	16	2	2	2	239	28.3	9.44
Q02846	Retinal guanylyl cyclase 1 OS=Homo sapiens GN=GUCY2D PE=1 SV=2 - [GUC2D_HUMAN]	4.91	2.36	1	2	2	2	1103	120.0	7.44
A6NKP2	Putative short-chain dehydrogenase/reductase family 42E member 2 OS=Homo sapiens GN=SDR42E2 PE=3 SV=3 - [D42E2_HUMAN]	4.91	6.16	1	2	2	2	422	46.8	9.63
Q17RV3	Leucine-rich repeat kinase 2 OS=Homo sapiens GN=LRRK2 PE=2 SV=1 - [Q17RV3_HUMAN]	4.91	0.99	6	2	2	3	2527	285.9	6.79
P08F94	Fibrocystin OS=Homo sapiens GN=PKHD1 PE=1 SV=1 - [PKHD1_HUMAN]	4.91	0.69	2	2	2	2	4074	446.4	6.57
Q96JE9	Microtubule-associated protein 6 OS=Homo sapiens GN=MAP6 PE=1 SV=2 - [MAP6_HUMAN]	4.91	1.97	1	1	1	2	813	86.5	9.16
A2VCL2	Coiled-coil domain-containing protein 162 OS=Homo sapiens GN=CCDC162P PE=2 SV=3 - [CC162_HUMAN]	4.91	4.52	1	1	2	2	907	103.8	7.90
Q9C007	Sodium channel protein OS=Homo sapiens GN=SCN3A PE=2 SV=1 - [Q9C007_HUMAN]	4.91	1.85	5	2	2	2	1951	221.4	5.72
Q5VXH4	PRAME family member 6 OS=Homo sapiens GN=PRAMEF6 PE=2 SV=1 - [PRAM6_HUMAN]	4.90	8.61	16	2	2	2	476	54.8	8.13
B4DQU2	cDNA FLJ51744, highly similar to Trpc4-associated protein OS=Homo sapiens PE=2 SV=1 - [B4DQU2_HUMAN]	4.90	4.09	4	1	2	2	782	89.1	7.12
Q5U0B9	Stem cell growth factor; lymphocyte secreted C-type lectin OS=Homo sapiens PE=2 SV=1 - [Q5U0B9_HUMAN]	4.90	6.81	3	2	2	2	323	35.6	5.16
B7Z747	cDNA FLJ51120, highly similar to Matrix metalloproteinase-9 (EC 3.4.24.35) OS=Homo sapiens PE=2 SV=1 - [B7Z747_HUMAN]	4.90	6.23	5	2	2	2	594	66.1	6.83
O60890	Oligophrenin-1 OS=Homo sapiens GN=OPHN1 PE=1 SV=1 - [OPHN1_HUMAN]	4.90	1.37	1	1	1	2	802	91.6	7.96
E7EQ67	Protein FAM184A OS=Homo sapiens GN=FAM184A PE=1 SV=1 - [E7EQ67_HUMAN]	4.90	5.10	6	1	2	2	529	61.4	5.55
G3V5X4	Nesprin-2 OS=Homo sapiens GN=SYNE2 PE=1 SV=1 - [G3V5X4_HUMAN]	4.90	0.34	5	2	2	2	6818	787.2	5.45
Q6ZSZ6	Teashirt homolog 1 OS=Homo sapiens GN=TSHZ1 PE=1 SV=2 - [TSH1_HUMAN]	4.90	3.25	5	2	2	2	1077	117.8	7.06
Q6MZE7	Putative uncharacterized protein DKFZp686A1525 (Fragment) OS=Homo sapiens GN=DKFZp686A1525 PE=2 SV=1 - [Q6MZE7_HUMAN]	4.89	8.06	5	1	2	2	335	37.8	5.44
A0A024RBT8	Coiled-coil domain containing 62, isoform CRA_a OS=Homo sapiens GN=CCDC62 PE=4 SV=1 - [A0A024RBT8_HUMAN]	4.89	2.62	2	1	1	2	497	56.4	6.21
B2RBA0	cDNA, FLJ95388, highly similar to Homo sapiens step II splicing factor SLU7 (SLU7), mRNA OS=Homo sapiens PE=2 SV=1 - [B2RBA0_HUMAN]	4.89	7.00	2	1	2	2	586	68.3	7.14
B3KU55	cDNA FLJ39219 fis, clone OCBBF2006849, weakly similar to Transmembrane protein 131 OS=Homo sapiens PE=2 SV=1 - [B3KU55_HUMAN]	4.89	1.56	3	2	2	2	895	99.5	6.95
B3KUW3	cDNA FLJ40751 fis, clone TRACH2000702, highly similar to Coiled-coil domain-containing protein 46 OS=Homo sapiens PE=2 SV=1 - [B3KUW3_HUMAN]	4.89	5.39	5	2	2	2	519	62.0	6.01
G3XAK3	CAP-Gly domain-containing linker protein 4 OS=Homo sapiens GN=CLIP4 PE=1 SV=1 - [G3XAK3_HUMAN]	4.89	2.42	7	1	1	2	495	53.7	7.34
Q7Z699	Sprouty-related, EVH1 domain-containing protein 1 OS=Homo sapiens GN=SPRED1 PE=1 SV=2 - [SPRE1_HUMAN]	4.89	4.50	1	1	2	2	444	50.4	6.54
P23409	Myogenic factor 6 OS=Homo sapiens GN=MYF6 PE=1 SV=1 - [MYF6_HUMAN]	4.89	10.74	1	1	2	2	242	26.9	5.96
A0A096LNL0	Uncharacterized protein OS=Homo sapiens PE=4 SV=1 - [A0A096LNL0_HUMAN]	4.88	7.49	1	1	1	2	227	25.2	10.40
L8EBG7	Alternative protein PPARD OS=Homo sapiens GN=PPARD PE=4 SV=1 - [L8EBG7_HUMAN]	4.88	30.95	1	1	1	2	42	4.7	8.98
A0A0A0MS88	Collagen and calcium-binding EGF domain-containing protein 1 OS=Homo sapiens GN=CCBE1 PE=1 SV=1 - [A0A0A0MS88_HUMAN]	4.88	11.01	2	1	2	2	336	36.5	7.62
K7EQA0	DNA-binding protein RFX2 (Fragment) OS=Homo sapiens GN=RFX2 PE=1 SV=1 - [K7EQA0_HUMAN]	4.88	34.01	1	1	2	2	147	16.8	9.77
Q96G74	OTU domain-containing protein 5 OS=Homo sapiens GN=OTUD5 PE=1 SV=1 - [OTUD5_HUMAN]	4.88	3.50	1	1	1	2	571	60.6	6.54
Q101R5	Receptor for advanced glycation end-products OS=Homo sapiens GN=AGER PE=2 SV=1 - [Q101R5_HUMAN]	4.87	8.98	1	2	2	2	323	34.8	9.26
Q6ZWL3	Cytochrome P450 4V2 OS=Homo sapiens GN=CYP4V2 PE=1 SV=2 - [CP4V2_HUMAN]	4.87	8.00	1	1	2	2	525	60.7	7.50
A0AUP3	LOC339290 protein (Fragment) OS=Homo sapiens GN=LOC339290 PE=2 SV=1 - [A0AUP3_HUMAN]	4.87	11.68	1	1	1	2	137	14.4	10.51
B4DKU5	cDNA FLJ56514, highly similar to Decaprenyl-diphosphate synthase subunit 2 (EC 2.5.1.-) OS=Homo sapiens PE=2 SV=1 - [B4DKU5_HUMAN]	4.87	7.07	3	1	2	2	297	32.6	9.07
B7Z8H1	cDNA FLJ54814 OS=Homo sapiens PE=2 SV=1 - [B7Z8H1_HUMAN]	4.87	9.82	2	1	2	2	224	24.2	8.66
Q86TF7	Homeobox C4 OS=Homo sapiens GN=HOXC4 PE=1 SV=1 - [Q86TF7_HUMAN]	4.87	6.06	1	1	1	2	264	29.8	9.13
Q6PII3	Coiled-coil domain-containing protein 174 OS=Homo sapiens GN=CCDC174 PE=1 SV=3 - [CC174_HUMAN]	4.86	6.85	2	1	2	2	467	53.9	6.33
Q96JM3	Chromosome alignment-maintaining phosphoprotein 1 OS=Homo sapiens GN=CHAMP1 PE=1 SV=2 - [CHAP1_HUMAN]	4.86	2.34	1	1	1	2	812	89.0	8.44
Q13715	Putative uncharacterized protein OS=Homo sapiens PE=4 SV=1 - [Q13715_HUMAN]	4.86	13.94	1	1	2	2	251	26.7	8.60
Q71SA9	GCDRP OS=Homo sapiens PE=2 SV=1 - [Q71SA9_HUMAN]	4.86	11.52	1	2	2	2	165	18.8	10.56
Q9BXD7	CMT duplicated region transcript 1 OS=Homo sapiens GN=CDRT1 PE=2 SV=1 - [Q9BXD7_HUMAN]	4.86	6.17	3	1	1	2	243	27.0	9.99
Q9BS19	HPX protein OS=Homo sapiens GN=HPX PE=1 SV=1 - [Q9BS19_HUMAN]	4.86	5.91	2	2	2	2	254	28.6	6.92
F5GZK2	Collagen alpha-1(XXI) chain OS=Homo sapiens GN=COL21A1 PE=1 SV=2 - [F5GZK2_HUMAN]	4.86	2.51	3	2	2	2	956	99.2	8.47
Q4QRI4	RGS9 protein OS=Homo sapiens GN=RGS9 PE=2 SV=1 - [Q4QRI4_HUMAN]	4.86	4.04	1	1	1	2	445	49.7	9.42
B7ZA10	cDNA, FLJ79024, highly similar to Arfaptin-1 OS=Homo sapiens PE=2 SV=1 - [B7ZA10_HUMAN]	4.86	12.16	3	2	2	2	296	33.7	8.43
H0YJJ4	Protein O-mannosyl-transferase 2 (Fragment) OS=Homo sapiens GN=POMT2 PE=1 SV=1 - [H0YJJ4_HUMAN]	4.86	9.84	1	1	1	2	193	21.7	9.92
A3KMF9	PDCD7 protein (Fragment) OS=Homo sapiens GN=PDCD7 PE=2 SV=1 - [A3KMF9_HUMAN]	4.86	6.67	4	1	2	2	270	32.0	9.52
K7EJV0	Septin-9 (Fragment) OS=Homo sapiens GN=SEPT9 PE=1 SV=1 - [K7EJV0_HUMAN]	4.85	11.20	8	1	1	2	125	13.7	10.33
B2RCX0	cDNA, FLJ96345, Homo sapiens SET translocation (myeloid leukemia-associated) (SET),mRNA OS=Homo sapiens PE=2 SV=1 - [B2RCX0_HUMAN]	4.85	8.66	6	2	2	2	277	32.1	4.22
B5MEB3	Calcineurin binding protein 1, isoform CRA_c OS=Homo sapiens GN=CABIN1 PE=1 SV=1 - [B5MEB3_HUMAN]	4.85	4.58	5	1	2	2	590	63.3	6.77
Q9UJN7	Zinc finger protein 391 OS=Homo sapiens GN=ZNF391 PE=2 SV=2 - [ZN391_HUMAN]	4.85	9.78	2	1	2	2	358	40.6	8.60
Q96J02	E3 ubiquitin-protein ligase Itchy homolog OS=Homo sapiens GN=ITCH PE=1 SV=2 - [ITCH_HUMAN]	4.85	3.43	3	2	2	2	903	102.7	6.30
B7Z7U4	Tyrosine-protein kinase receptor OS=Homo sapiens GN=NTRK3 PE=1 SV=1 - [B7Z7U4_HUMAN]	4.85	4.70	10	2	2	2	617	69.0	6.73
A6NNA5	Dorsal root ganglia homeobox protein OS=Homo sapiens GN=DRGX PE=3 SV=1 - [DRGX_HUMAN]	4.85	9.51	1	2	2	2	263	28.7	8.46
Q9H009	Nascent polypeptide-associated complex subunit alpha-2 OS=Homo sapiens GN=NACA2 PE=1 SV=1 - [NACA2_HUMAN]	4.85	6.98	1	1	1	2	215	23.2	4.73
Q9BVI0	PHD finger protein 20 OS=Homo sapiens GN=PHF20 PE=1 SV=2 - [PHF20_HUMAN]	4.85	4.15	5	2	2	2	1012	115.3	6.99
J3QKW2	28S ribosomal protein S7, mitochondrial OS=Homo sapiens GN=MRPS7 PE=1 SV=1 - [J3QKW2_HUMAN]	4.85	18.58	5	1	2	2	183	20.8	9.55
B4DP10	Secretory carrier-associated membrane protein OS=Homo sapiens PE=2 SV=1 - [B4DP10_HUMAN]	4.84	21.62	8	1	2	2	259	28.4	7.36
A0A024R872	Chromosome 9 open reading frame 88, isoform CRA_a OS=Homo sapiens GN=C9orf88 PE=4 SV=1 - [A0A024R872_HUMAN]	4.84	6.41	2	2	2	2	733	82.6	6.15
D6RF15	Acyl-CoA synthetase family member 2, mitochondrial OS=Homo sapiens GN=ACSF2 PE=4 SV=1 - [D6RF15_HUMAN]	4.84	68.52	6	2	2	2	54	5.8	11.62
Q075Z2	Binder of sperm protein homolog 1 OS=Homo sapiens GN=BSPH1 PE=2 SV=1 - [BSPH1_HUMAN]	4.84	9.85	1	1	1	2	132	15.7	7.17
B3KWB6	cDNA FLJ42728 fis, clone BRAWH2010000, highly similar to Homo sapiens multiple coiled-coil GABABR1-binding protein (MARLIN1), mRNA OS=Homo sapiens PE=2 SV=1 - [B3KWB6_HUMAN]	4.84	3.19	5	2	2	2	626	73.1	6.10
Q2M329	Coiled-coil domain-containing protein 96 OS=Homo sapiens GN=CCDC96 PE=2 SV=2 - [CCD96_HUMAN]	4.84	3.96	1	1	2	2	555	62.7	4.94
Q69YP1	Putative uncharacterized protein DKFZp762M013 (Fragment) OS=Homo sapiens GN=DKFZp762M013 PE=2 SV=1 - [Q69YP1_HUMAN]	4.84	4.12	1	1	2	2	728	87.3	6.87
Q8IVS5	ZNF544 protein OS=Homo sapiens GN=ZNF544 PE=2 SV=1 - [Q8IVS5_HUMAN]	4.84	31.13	6	1	2	2	106	12.0	4.28
Q96JS0	Tubby homologue (Fragment) OS=Homo sapiens GN=TUB PE=3 SV=1 - [Q96JS0_HUMAN]	4.84	9.92	5	1	2	2	373	40.4	9.23
A0A075B6T1	Activating molecule in BECN1-regulated autophagy protein 1 OS=Homo sapiens GN=AMBRA1 PE=1 SV=1 - [A0A075B6T1_HUMAN]	4.84	1.36	3	2	2	2	1179	129.5	6.98
Q96S00	Putative uncharacterized protein gs85 OS=Homo sapiens GN=gs85 PE=4 SV=1 - [Q96S00_HUMAN]	4.83	7.51	1	2	2	2	639	68.7	8.91
A0A087WXF6	NADH dehydrogenase [ubiquinone] iron-sulfur protein 7, mitochondrial OS=Homo sapiens GN=NDUFS7 PE=1 SV=1 - [A0A087WXF6_HUMAN]	4.83	15.42	11	2	2	2	214	23.7	11.66
Q6ZT07	TBC1 domain family member 9 OS=Homo sapiens GN=TBC1D9 PE=2 SV=2 - [TBCD9_HUMAN]	4.83	2.61	1	1	2	2	1266	143.1	5.31
F8VW50	Kinesin-like protein (Fragment) OS=Homo sapiens GN=KIF19 PE=3 SV=1 - [F8VW50_HUMAN]	4.83	4.24	2	1	2	2	613	70.1	6.93
Q15051	IQ calmodulin-binding motif-containing protein 1 OS=Homo sapiens GN=IQCB1 PE=1 SV=1 - [IQCB1_HUMAN]	4.83	4.85	2	1	2	2	598	68.9	9.10
O75973	C1q-related factor OS=Homo sapiens GN=C1QL1 PE=1 SV=1 - [C1QRF_HUMAN]	4.83	11.24	1	2	2	2	258	26.4	5.57
B4DJX2	cDNA FLJ52085, highly similar to BTB/POZ domain-containing protein KCTD3 OS=Homo sapiens PE=2 SV=1 - [B4DJX2_HUMAN]	4.83	5.64	18	2	2	2	567	62.0	6.67
Q96EB6	NAD-dependent protein deacetylase sirtuin-1 OS=Homo sapiens GN=SIRT1 PE=1 SV=2 - [SIR1_HUMAN]	4.82	3.48	6	1	2	2	747	81.6	4.67
B5BU99	High glucose-regulated protein 8 OS=Homo sapiens GN=YTHDF2 PE=2 SV=1 - [B5BU99_HUMAN]	4.82	5.79	2	2	2	2	570	61.3	9.10
G3V4J0	Protein TALPID3 (Fragment) OS=Homo sapiens GN=KIAA0586 PE=1 SV=1 - [G3V4J0_HUMAN]	4.82	8.33	5	1	1	2	132	14.2	5.12
Q96Q42	Alsin OS=Homo sapiens GN=ALS2 PE=1 SV=2 - [ALS2_HUMAN]	4.82	1.75	1	1	2	2	1657	183.5	6.27
Q9H8B9	cDNA FLJ13778 fis, clone PLACE4000431, highly similar to H.sapiens U5 snRNP-specific 200kD protein OS=Homo sapiens PE=2 SV=1 - [Q9H8B9_HUMAN]	4.82	3.36	3	1	2	2	774	87.8	6.70
B4DG59	cDNA FLJ60105, highly similar to Protein RUFY3 OS=Homo sapiens PE=2 SV=1 - [B4DG59_HUMAN]	4.82	7.36	4	1	2	2	435	49.2	5.47
A0A024RA74	Up-regulated gene 4, isoform CRA_a OS=Homo sapiens GN=URG4 PE=4 SV=1 - [A0A024RA74_HUMAN]	4.82	3.15	6	1	2	2	922	104.0	6.48
H9KVD5	UAP56-interacting factor (Fragment) OS=Homo sapiens GN=FYTTD1 PE=1 SV=1 - [H9KVD5_HUMAN]	4.81	17.46	1	1	2	2	126	14.4	10.77
Q13418	Integrin-linked protein kinase OS=Homo sapiens GN=ILK PE=1 SV=2 - [ILK_HUMAN]	4.81	5.75	3	2	2	2	452	51.4	8.07
Q6ZNZ9	cDNA FLJ26814 fis, clone PRS06344 OS=Homo sapiens PE=2 SV=1 - [Q6ZNZ9_HUMAN]	4.81	12.27	1	1	2	2	277	29.5	10.99
P08842	Steryl-sulfatase OS=Homo sapiens GN=STS PE=1 SV=2 - [STS_HUMAN]	4.81	6.00	1	2	2	2	583	65.5	7.66
F8W1E3	Tastin (Fragment) OS=Homo sapiens GN=TROAP PE=1 SV=1 - [F8W1E3_HUMAN]	4.81	10.69	4	1	2	2	290	31.3	11.19
A8K0R6	cDNA FLJ78496, highly similar to Homo sapiens TBC1 domain family, member 19, mRNA OS=Homo sapiens PE=2 SV=1 - [A8K0R6_HUMAN]	4.81	5.13	5	2	2	2	526	60.1	5.97
B4E3T6	cDNA FLJ56405, highly similar to Epidermal growth factor receptor kinase substrate 8 OS=Homo sapiens PE=2 SV=1 - [B4E3T6_HUMAN]	4.81	1.74	2	1	1	2	691	77.0	7.85
A0A193CHR8	10E8 light chain variable region (Fragment) OS=Homo sapiens PE=2 SV=1 - [A0A193CHR8_HUMAN]	4.80	13.76	1	1	1	2	109	11.6	9.20
H7C1N6	Uncharacterized protein (Fragment) OS=Homo sapiens PE=4 SV=2 - [H7C1N6_HUMAN]	4.80	7.89	3	1	1	2	152	17.8	6.02
H0YLD8	SH2 domain-containing adapter protein F OS=Homo sapiens GN=SHF PE=1 SV=1 - [H0YLD8_HUMAN]	4.80	18.28	4	2	2	2	290	29.8	4.87
K7ELZ8	Protein FAM32A (Fragment) OS=Homo sapiens GN=FAM32A PE=1 SV=1 - [K7ELZ8_HUMAN]	4.80	29.27	4	2	2	2	82	9.4	10.29
Q5VVM6	Coiled-coil domain-containing protein 30 OS=Homo sapiens GN=CCDC30 PE=2 SV=1 - [CCD30_HUMAN]	4.80	3.32	4	1	2	2	783	91.3	5.77
Q13537	Putative transposase OS=Homo sapiens PE=4 SV=2 - [Q13537_HUMAN]	4.80	6.83	1	2	2	2	454	51.6	8.85
P10301	Ras-related protein R-Ras OS=Homo sapiens GN=RRAS PE=1 SV=1 - [RRAS_HUMAN]	4.80	9.17	1	1	2	2	218	23.5	6.93
Q7Z517	Transgelin OS=Homo sapiens PE=2 SV=1 - [Q7Z517_HUMAN]	4.80	14.48	3	1	2	2	221	24.9	8.15
B2RTX8	WAPAL protein OS=Homo sapiens GN=WAPAL PE=2 SV=1 - [B2RTX8_HUMAN]	4.80	2.28	4	1	2	2	1184	132.1	5.48
K7EQN3	Cysteine protease ATG4D OS=Homo sapiens GN=ATG4D PE=4 SV=1 - [K7EQN3_HUMAN]	4.80	10.00	1	1	1	2	160	16.2	9.73
A0A024R4A5	Trinucleotide repeat containing 15, isoform CRA_a OS=Homo sapiens GN=TNRC15 PE=4 SV=1 - [A0A024R4A5_HUMAN]	4.80	2.00	7	1	2	2	1298	149.9	5.54
Q9H7I8	FLJ00096 protein (Fragment) OS=Homo sapiens GN=FLJ00096 PE=2 SV=1 - [Q9H7I8_HUMAN]	4.79	13.46	1	1	2	2	208	22.3	10.26
P23470	Receptor-type tyrosine-protein phosphatase gamma OS=Homo sapiens GN=PTPRG PE=1 SV=4 - [PTPRG_HUMAN]	4.79	2.01	1	1	2	2	1445	161.9	6.42
F8W6K2	N-chimaerin (Fragment) OS=Homo sapiens GN=CHN1 PE=1 SV=1 - [F8W6K2_HUMAN]	4.79	17.53	9	1	2	2	194	21.8	7.37
Q9H2F9	Coiled-coil domain-containing protein 68 OS=Homo sapiens GN=CCDC68 PE=1 SV=1 - [CCD68_HUMAN]	4.79	4.48	1	1	1	2	335	38.8	8.65
A0AV47	Topoisomerase (DNA) II binding protein 1 OS=Homo sapiens GN=TOPBP1 PE=2 SV=2 - [A0AV47_HUMAN]	4.79	2.09	3	1	2	2	1435	160.5	6.99
H7C1U3	Coiled-coil and C2 domain-containing protein 1B (Fragment) OS=Homo sapiens GN=CC2D1B PE=1 SV=2 - [H7C1U3_HUMAN]	4.79	2.08	2	1	1	2	672	74.6	8.54
O15050	TPR and ankyrin repeat-containing protein 1 OS=Homo sapiens GN=TRANK1 PE=2 SV=4 - [TRNK1_HUMAN]	4.78	0.99	1	1	2	2	2925	336.0	6.76
O95447	Lebercilin-like protein OS=Homo sapiens GN=LCA5L PE=1 SV=1 - [LCA5L_HUMAN]	4.78	3.88	1	1	2	2	670	76.5	9.48
Q8N1G4	Leucine-rich repeat-containing protein 47 OS=Homo sapiens GN=LRRC47 PE=1 SV=1 - [LRC47_HUMAN]	4.78	4.12	1	1	2	2	583	63.4	8.28
Q15554	Telomeric repeat-binding factor 2 OS=Homo sapiens GN=TERF2 PE=1 SV=3 - [TERF2_HUMAN]	4.78	5.90	5	2	2	2	542	59.6	9.35
P06213	Insulin receptor OS=Homo sapiens GN=INSR PE=1 SV=4 - [INSR_HUMAN]	4.78	2.82	2	2	2	2	1382	156.2	6.20
H0YHL6	Methionine--tRNA ligase, cytoplasmic (Fragment) OS=Homo sapiens GN=MARS PE=1 SV=1 - [H0YHL6_HUMAN]	4.78	14.81	7	1	2	2	81	8.8	8.59
O15054	Lysine-specific demethylase 6B OS=Homo sapiens GN=KDM6B PE=1 SV=4 - [KDM6B_HUMAN]	4.78	2.01	1	1	2	2	1643	176.5	8.54
Q68DC4	Putative uncharacterized protein DKFZp779G2333 (Fragment) OS=Homo sapiens GN=DKFZp779G2333 PE=2 SV=1 - [Q68DC4_HUMAN]	4.78	28.30	5	1	1	2	53	6.0	9.47
B4DKB5	Dipeptidyl-peptidase 10, isoform CRA_b OS=Homo sapiens GN=DPP10 PE=2 SV=1 - [B4DKB5_HUMAN]	4.77	3.42	5	1	2	2	789	90.1	6.39
B4E0B7	Condensin complex subunit 1 OS=Homo sapiens PE=2 SV=1 - [B4E0B7_HUMAN]	4.77	2.06	6	1	2	2	1356	152.1	6.74
Q5H9M0	PWWP domain-containing protein MUM1L1 OS=Homo sapiens GN=MUM1L1 PE=2 SV=1 - [MUML1_HUMAN]	4.77	1.58	1	1	1	2	696	79.0	4.97
P17040	Zinc finger and SCAN domain-containing protein 20 OS=Homo sapiens GN=ZSCAN20 PE=2 SV=3 - [ZSC20_HUMAN]	4.77	3.16	1	2	2	2	1043	117.5	6.43
H3BMM9	RNA-binding protein with serine-rich domain 1 (Fragment) OS=Homo sapiens GN=RNPS1 PE=1 SV=1 - [H3BMM9_HUMAN]	4.77	7.75	13	2	2	2	284	31.7	11.62
Q9Y5T5	Ubiquitin carboxyl-terminal hydrolase 16 OS=Homo sapiens GN=USP16 PE=1 SV=1 - [UBP16_HUMAN]	4.77	3.16	1	2	2	2	823	93.5	6.93
Q8NBB4	Zinc finger and SCAN domain-containing protein 1 OS=Homo sapiens GN=ZSCAN1 PE=1 SV=2 - [ZSCA1_HUMAN]	4.77	7.35	3	2	2	2	408	45.3	8.54
F5GWA4	BTB/POZ domain-containing adapter for CUL3-mediated RhoA degradation protein 3 OS=Homo sapiens GN=KCTD10 PE=1 SV=1 - [F5GWA4_HUMAN]	4.77	12.89	4	1	2	2	287	32.4	7.06
H0YMS2	Hepatocyte nuclear factor 6 OS=Homo sapiens GN=ONECUT1 PE=4 SV=1 - [H0YMS2_HUMAN]	4.77	19.70	1	1	1	2	66	7.6	10.08
P52735	Guanine nucleotide exchange factor VAV2 OS=Homo sapiens GN=VAV2 PE=1 SV=2 - [VAV2_HUMAN]	4.77	1.94	1	1	1	2	878	101.2	7.08
Q5T2E7	UPF0668 protein C10orf76 OS=Homo sapiens GN=C10orf76 PE=1 SV=1 - [Q5T2E7_HUMAN]	4.77	5.56	3	1	1	2	198	22.9	8.37
Q6AHZ1	Zinc finger protein 518A OS=Homo sapiens GN=ZNF518A PE=1 SV=2 - [Z518A_HUMAN]	4.77	2.23	1	2	2	2	1483	166.7	9.28
Q9HC84	Mucin-5B OS=Homo sapiens GN=MUC5B PE=1 SV=3 - [MUC5B_HUMAN]	4.77	1.49	2	1	2	2	5762	596.0	6.64
B4E2U2	cDNA FLJ52839, highly similar to Cell surface glycoprotein OX2 receptor OS=Homo sapiens PE=2 SV=1 - [B4E2U2_HUMAN]	4.76	12.74	4	2	2	2	212	23.8	8.19
A0A087WZ85	Roundabout homolog 1 OS=Homo sapiens GN=ROBO1 PE=1 SV=1 - [A0A087WZ85_HUMAN]	4.76	2.16	6	1	2	2	1525	166.6	6.13
C9JLV4	Apoptotic protease-activating factor 1 OS=Homo sapiens GN=APAF1 PE=1 SV=1 - [C9JLV4_HUMAN]	4.76	3.01	4	1	2	2	1163	132.4	6.51
E7EWM1	Nuclear receptor coactivator 2 OS=Homo sapiens GN=NCOA2 PE=1 SV=2 - [E7EWM1_HUMAN]	4.76	2.43	3	1	2	2	946	102.7	6.74
V9HW15	Epididymis secretory protein Li 87 OS=Homo sapiens GN=HEL-S-87 PE=2 SV=1 - [V9HW15_HUMAN]	4.76	13.78	2	1	2	2	196	22.5	8.19
B4E2L8	cDNA FLJ53487, highly similar to Coagulation factor XIII A chain (EC 2.3.2.13) OS=Homo sapiens PE=2 SV=1 - [B4E2L8_HUMAN]	4.76	4.79	3	1	2	2	626	70.3	5.34
B4E3H4	cDNA FLJ54470, highly similar to Puratrophin-1 OS=Homo sapiens PE=2 SV=1 - [B4E3H4_HUMAN]	4.76	2.51	2	2	2	2	998	110.9	6.57
Q14DG7	Transmembrane protein 132B OS=Homo sapiens GN=TMEM132B PE=2 SV=2 - [T132B_HUMAN]	4.76	2.41	1	1	2	2	1078	119.4	4.75
A8MUI8	Putative UPF0607 protein ENSP00000383783 OS=Homo sapiens PE=3 SV=2 - [YA034_HUMAN]	4.76	7.04	7	1	2	2	341	37.6	9.88
B4DR70	cDNA FLJ58049, highly similar to RNA-binding protein FUS OS=Homo sapiens PE=2 SV=1 - [B4DR70_HUMAN]	4.76	6.53	9	1	2	2	429	44.8	9.00
Q07283	Trichohyalin OS=Homo sapiens GN=TCHH PE=1 SV=2 - [TRHY_HUMAN]	4.76	1.34	1	1	2	2	1943	253.8	5.78
H0UI63	Zinc finger, NFX1-type containing 1, isoform CRA_b OS=Homo sapiens GN=ZNFX1 PE=4 SV=1 - [H0UI63_HUMAN]	4.75	1.62	6	2	2	2	1918	220.1	7.30
C9JCH4	Sarcolemmal membrane-associated protein (Fragment) OS=Homo sapiens GN=SLMAP PE=1 SV=1 - [C9JCH4_HUMAN]	4.75	26.61	9	2	2	2	109	12.6	4.82
P57773	Gap junction alpha-9 protein OS=Homo sapiens GN=GJA9 PE=2 SV=2 - [CXA9_HUMAN]	4.75	2.14	1	1	1	2	515	58.8	8.37
Q8N7J2	APC membrane recruitment protein 2 OS=Homo sapiens GN=AMER2 PE=1 SV=3 - [AMER2_HUMAN]	4.75	3.73	1	1	2	2	671	69.5	6.99
A4ZLL2	ATP synthase protein 8 OS=Homo sapiens GN=ATP8 PE=3 SV=1 - [A4ZLL2_HUMAN]	4.75	23.53	3	1	1	2	68	8.0	9.55
F8WDP4	Mitogen-activated protein kinase 11 OS=Homo sapiens GN=MAPK11 PE=1 SV=1 - [F8WDP4_HUMAN]	4.75	9.20	2	1	1	2	163	18.4	9.72
Q7Z674	Fasciculation and elongation protein zeta 2 (Zygin II), isoform CRA_d OS=Homo sapiens GN=DKFZp779C2259 PE=1 SV=1 - [Q7Z674_HUMAN]	4.75	12.64	11	1	2	2	182	20.9	5.26
O94760	N(G),N(G)-dimethylarginine dimethylaminohydrolase 1 OS=Homo sapiens GN=DDAH1 PE=1 SV=3 - [DDAH1_HUMAN]	4.74	10.18	3	1	2	2	285	31.1	5.81
Q9UKK3	Poly [ADP-ribose] polymerase 4 OS=Homo sapiens GN=PARP4 PE=1 SV=3 - [PARP4_HUMAN]	4.74	2.78	2	2	2	2	1724	192.5	5.66
H0Y4Y4	EF-hand domain-containing protein D2 (Fragment) OS=Homo sapiens GN=EFHD2 PE=1 SV=1 - [H0Y4Y4_HUMAN]	4.74	16.20	2	2	2	2	179	19.6	6.35
Q15908	Uncharacterized protein (Fragment) OS=Homo sapiens PE=2 SV=1 - [Q15908_HUMAN]	4.74	22.56	1	1	2	2	133	15.0	8.87
Q15070	Mitochondrial inner membrane protein OXA1L OS=Homo sapiens GN=OXA1L PE=1 SV=3 - [OXA1L_HUMAN]	4.74	5.29	6	1	2	2	435	48.5	9.45
Q96NP5	HCG2008157 OS=Homo sapiens GN=hCG_2008157 PE=2 SV=1 - [Q96NP5_HUMAN]	4.74	8.40	1	1	2	2	262	29.0	8.56
Q14766	Latent-transforming growth factor beta-binding protein 1 OS=Homo sapiens GN=LTBP1 PE=1 SV=4 - [LTBP1_HUMAN]	4.74	0.81	1	1	1	2	1721	186.7	5.96
B4DEW9	cDNA FLJ52478, highly similar to Eukaryotic translation initiation factor 3 subunit 5 OS=Homo sapiens PE=2 SV=1 - [B4DEW9_HUMAN]	4.74	5.77	4	1	1	2	208	23.2	5.80
B3KRP4	cDNA FLJ34665 fis, clone LIVER2000626, highly similar to Zinc finger protein 38 OS=Homo sapiens PE=2 SV=1 - [B3KRP4_HUMAN]	4.74	9.79	9	1	2	2	429	49.4	7.65
B7Z6C1	cDNA FLJ56880 OS=Homo sapiens PE=2 SV=1 - [B7Z6C1_HUMAN]	4.74	8.24	1	1	2	2	449	47.2	11.33
E5RJ29	PH and SEC7 domain-containing protein 3 OS=Homo sapiens GN=PSD3 PE=1 SV=1 - [E5RJ29_HUMAN]	4.73	2.55	8	2	2	2	982	108.9	6.05
A0A1B0GUG6	Ras association domain-containing protein 3 OS=Homo sapiens GN=RASSF3 PE=1 SV=1 - [A0A1B0GUG6_HUMAN]	4.73	13.71	3	1	2	2	299	34.6	8.75
O15266	Short stature homeobox protein OS=Homo sapiens GN=SHOX PE=1 SV=1 - [SHOX_HUMAN]	4.73	4.79	2	1	1	2	292	32.2	7.64
Q8TAE8	Growth arrest and DNA damage-inducible proteins-interacting protein 1 OS=Homo sapiens GN=GADD45GIP1 PE=1 SV=1 - [G45IP_HUMAN]	4.73	16.67	1	2	2	2	222	25.4	10.02
Q92884	Tissue plasminogen activator (Fragment) OS=Homo sapiens PE=2 SV=1 - [Q92884_HUMAN]	4.73	9.64	1	2	2	2	166	18.0	9.26
N0DVX5	DBF4-type zinc finger-containing protein 2 OS=Homo sapiens GN=ZDBF2 PE=1 SV=1 - [N0DVX5_HUMAN]	4.73	0.77	2	1	2	2	2352	264.9	6.11
C9JG86	Histone-lysine N-methyltransferase SETD2 (Fragment) OS=Homo sapiens GN=SETD2 PE=1 SV=1 - [C9JG86_HUMAN]	4.73	2.54	5	1	2	2	1340	149.2	6.27
Q8N412	Sperm-tail PG-rich repeat-containing protein 2 OS=Homo sapiens GN=STPG2 PE=2 SV=1 - [STPG2_HUMAN]	4.73	5.01	1	1	2	2	459	50.6	9.57
E9PQL2	Non-receptor tyrosine-protein kinase TYK2 (Fragment) OS=Homo sapiens GN=TYK2 PE=1 SV=1 - [E9PQL2_HUMAN]	4.73	21.19	5	2	2	2	118	13.2	8.57
Q7Z406	Myosin-14 OS=Homo sapiens GN=MYH14 PE=1 SV=2 - [MYH14_HUMAN]	4.73	1.25	4	1	2	2	1995	227.7	5.60
Q14678	KN motif and ankyrin repeat domain-containing protein 1 OS=Homo sapiens GN=KANK1 PE=1 SV=3 - [KANK1_HUMAN]	4.73	1.70	5	1	2	2	1352	147.2	5.30
Q8IWP8	Transient receptor potential channel 7 beta splice variant OS=Homo sapiens PE=2 SV=1 - [Q8IWP8_HUMAN]	4.73	1.86	4	1	1	2	806	93.2	7.50
Q70E73	Ras-associated and pleckstrin homology domains-containing protein 1 OS=Homo sapiens GN=RAPH1 PE=1 SV=3 - [RAPH1_HUMAN]	4.72	2.32	4	1	2	2	1250	135.2	8.85
C9JS03	Zinc finger protein 655 (Fragment) OS=Homo sapiens GN=ZNF655 PE=1 SV=1 - [C9JS03_HUMAN]	4.72	12.09	13	2	2	2	182	21.1	4.72
O75387	Large neutral amino acids transporter small subunit 3 OS=Homo sapiens GN=SLC43A1 PE=1 SV=1 - [LAT3_HUMAN]	4.72	4.47	6	1	2	2	559	61.4	7.68
H7C3P6	Nuclear pore complex protein Nup98-Nup96 (Fragment) OS=Homo sapiens GN=NUP98 PE=1 SV=1 - [H7C3P6_HUMAN]	4.72	5.44	3	2	2	2	753	85.7	6.19
Q6P1L5	Protein FAM117B OS=Homo sapiens GN=FAM117B PE=1 SV=2 - [F117B_HUMAN]	4.72	4.24	1	1	2	2	589	61.9	9.82
B0QYA6	Eukaryotic translation initiation factor 3 subunit D (Fragment) OS=Homo sapiens GN=EIF3D PE=1 SV=1 - [B0QYA6_HUMAN]	4.72	14.45	4	1	2	2	173	20.6	9.92
[truncated: 3,565 more rows]
